# Supplementary material for: Feeding of prehistoric and historic horses at the eastern Baltic Sea region and western Russia
Source: Research Square preprint supplement (doi:10.21203/rs.3.rs-7044177/v1), 2025-07-15
Supplement: Supplementary file 1 [file 189058df379b8bfa105f7317.xlsx]

## Sheet: Sheet1
Supplementary Table 1. Archaeological bones and teeth of horses used as references from dIANA batabase (Dietary Isotopic Baseline for the Ancient North) or publications with stable isotope ratios of carbon (δ13C) and nitrogen (δ15N) measured. The samples are grouped by country and wild status also indicated. Sample id, archaeological site, country, study material, dating based on archaeological c…
Nro	Group	Species	Id	Site	Country	Material	Phase	Time period	14C age yr BP	Standard deviation	δ13C (‰)	δ15N (‰)	% C	% N	C/N atomic ratio	14C/stable isotope laboratory	Authors	Publication	DOI/Website
1	Finland reference	Equus caballus	KM 21814:584	Isokyrö Levänluhta (Leväluhta)	Finland	Bone		Holocene	593	29	-22.8	4.3	37.7	13.1	3.4	Laboratory of Chronology University of Helsinki; Finland and Department of Geosciences at the University of Tübingen; Germany	SI: Oinonen et al. 2020; AMS: Wessman et al. EJA 2018	SI: PloS one (2020): 15(4); e0231787; AMS: European Journal of Archaeology (2018): 21(3), 431–454	SI: https://doi.org/10.1371/journal.pone.0231787; AMS: https://doi.org/doi:10.1017/eaa.2017.84
2	Finland reference	Equus caballus	KM 22395:43	Isokyrö Levänluhta (Leväluhta)	Finland	Bone		Holocene	382	25	-22.7	5.5	39.6	14	3.3	Laboratory of Chronology University of Helsinki; Finland and Department of Geosciences at the University of Tübingen; Germany	SI: Oinonen et al. 2020; AMS: Wessman et al. EJA 2019	SI: PloS one (2020): 15(4); e0231787; AMS: European Journal of Archaeology (2018): 21(3), 431–455	SI: https://doi.org/10.1371/journal.pone.0231787; AMS: https://doi.org/doi:10.1017/eaa.2017.85
3	Finland reference	Equus caballus	KM 21814:23	Isokyrö Levänluhta (Leväluhta)	Finland	Bone		Holocene	555	29	-22.4	5.9	40	14.2	3.3	Laboratory of Chronology University of Helsinki; Finland and Department of Geosciences at the University of Tübingen; Germany	SI: Oinonen et al. 2020; AMS: Wessman et al. EJA 2020	SI: PloS one (2020): 15(4); e0231787; AMS: European Journal of Archaeology (2018): 21(3), 431–456	SI: https://doi.org/10.1371/journal.pone.0231787; AMS: https://doi.org/doi:10.1017/eaa.2017.86
4	Finland reference	Equus caballus	KM 21814:525	Isokyrö Levänluhta (Leväluhta)	Finland	Bone		Holocene	572	29	-22.8	5.2	40.7	14.4	3.3	Laboratory of Chronology University of Helsinki; Finland and Department of Geosciences at the University of Tübingen; Germany	SI: Oinonen et al. 2020; AMS: Wessman et al. EJA 2021	SI: PloS one (2020): 15(4); e0231787; AMS: European Journal of Archaeology (2018): 21(3), 431–457	SI: https://doi.org/10.1371/journal.pone.0231787; AMS: https://doi.org/doi:10.1017/eaa.2017.87
5	Finland reference	Equus caballus	KM 2441:5	Isokyrö Levänluhta (Leväluhta)	Finland	Bone		Holocene	585	28	-22.7	7.3	40.7	14.4	3.2	Laboratory of Chronology University of Helsinki; Finland and Department of Geosciences at the University of Tübingen; Germany	SI: Oinonen et al. 2020; AMS: Wessman et al. EJA 2022	SI: PloS one (2020): 15(4); e0231787; AMS: European Journal of Archaeology (2018): 21(3), 431–458	SI: https://doi.org/10.1371/journal.pone.0231787; AMS: https://doi.org/doi:10.1017/eaa.2017.88
6	Finland reference	Equus caballus	KM 10202:4 or 10438:14	Isokyrö Levänluhta (Leväluhta)	Finland	Bone		Holocene	117	25	-22.1	7.8	38.9	14	3.2	Laboratory of Chronology University of Helsinki; Finland and Department of Geosciences at the University of Tübingen; Germany	SI: Oinonen et al. 2020; AMS: Wessman et al. EJA 2023	SI: PloS one (2020): 15(4); e0231787; AMS: European Journal of Archaeology (2018): 21(3), 431–459	SI: https://doi.org/10.1371/journal.pone.0231787; AMS: https://doi.org/doi:10.1017/eaa.2017.89
7	Finland reference	Equus caballus	KM 6111:7;701	Isokyrö Levänluhta (Leväluhta)	Finland	Bone		Holocene	330	27	-22.6	5.7	38.5	13.9	3.2	Laboratory of Chronology University of Helsinki; Finland and Department of Geosciences at the University of Tübingen; Germany	SI: Oinonen et al. 2020; AMS: Wessman et al. EJA 2024	SI: PloS one (2020): 15(4); e0231787; AMS: European Journal of Archaeology (2018): 21(3), 431–460	SI: https://doi.org/10.1371/journal.pone.0231787; AMS: https://doi.org/doi:10.1017/eaa.2017.90
8	Finland reference	Equus caballus	KM 21814:526	Isokyrö Levänluhta (Leväluhta)	Finland	Bone		Holocene	595	26	-22.8	5.7	42.3	14.8	3.3	Laboratory of Chronology University of Helsinki; Finland and Department of Geosciences at the University of Tübingen; Germany	SI: Oinonen et al. 2020; AMS: Wessman et al. EJA 2025	SI: PloS one (2020): 15(4); e0231787; AMS: European Journal of Archaeology (2018): 21(3), 431–461	SI: https://doi.org/10.1371/journal.pone.0231787; AMS: https://doi.org/doi:10.1017/eaa.2017.91
9	Finland reference	Equus caballus	KM 6373:15; 14; 17; 1420	Isokyrö Levänluhta (Leväluhta)	Finland	Bone		Holocene			-22.3	7.9	37	13	3.3	Laboratory of Chronology University of Helsinki; Finland and Department of Geosciences at the University of Tübingen; Germany	SI: Oinonen et al. 2020; AMS: Wessman et al. EJA 2026	SI: PloS one (2020): 15(4); e0231787; AMS: European Journal of Archaeology (2018): 21(3), 431–462	SI: https://doi.org/10.1371/journal.pone.0231787; AMS: https://doi.org/doi:10.1017/eaa.2017.92
10	Finland reference	Equus caballus	Equus 1	Eura Luistari	Finland	Dentine	Late grave	Holocene			-22.9	5.1	23.4	8.3	3.3	Laboratory of Chronology University of Helsinki	Etu-Sihvola et al. 2019	Journal of Archaeological Science: Reports 24 (2019): 1003–1013	https://doi.org/10.1016/j.jasrep.2019.03.005
11	Finland reference	Equus caballus	Equus 2	Eura Luistari	Finland	Dentine	Late grave	Holocene			-23.3	3.7	26.5	9.4	3.3	Laboratory of Chronology University of Helsinki	Etu-Sihvola et al. 2019	Journal of Archaeological Science: Reports 24 (2019): 1003–1013	https://doi.org/10.1016/j.jasrep.2019.03.005
12	Finland reference	Equus caballus	AKS-19	Tornio	Finland	Bone		Holocene	276	25	-23.4	5.9	42.9	15.1	3.3		Lahtinen & Salmi 2018	Arctic Anthropology (2018): 55(2), 76-96	https://doi.org/10.3368/aa.55.2.76
13	Finland reference	Equus caballus	AKS-20	Tornio	Finland	Bone		Holocene	394	24	-23.4	5.1	36.4	12.7	3.4		Lahtinen & Salmi 2018	Arctic Anthropology (2018): 55(2), 76-96	https://doi.org/10.3368/aa.55.2.76
14	Sweden reference	Equus	ALM66	Alvastra dolmen	Sweden	Bone		Holocene	1271	30	-22	7.9	43.4	16.1	3.1	Stable Isotope Laboratory (SIL); Department of Geological Sciences; Stockholm University; Sweden	Fornander 2011	Current Swedish Archaeology 19 (2011): 113–141	https://doi.org/10.37718/CSA.2011.09
15	Sweden reference	Equus	ALM65	Alvastra dolmen	Sweden	Dentine		Holocene	1274	31	-22.1	6.3	43.7	16.1	3.2	Stable Isotope Laboratory (SIL); Department of Geological Sciences; Stockholm University; Sweden	Fornander 2011	Current Swedish Archaeology 19 (2011): 113–141	https://doi.org/10.37718/CSA.2011.09
16	Sweden reference	Equus caballus	F434	Björned; Torsåker Ångermanland	Sweden	Bone	Late Iron Age	Holocene			-23	4.3			3.3	Department of Geology and Geochemistry; University of Stockholm; Sweden	Linderholm et al. 2008	Fornvännen 103 (2008): 176–189	http://kulturarvsdata.se/raa/fornvannen/2008_176
17	Sweden reference	Equus caballus	BJA1028	Bjärby Öland	Sweden	Dentine		Holocene			-22.1	9.4			3.3	Department of Geology and Geochemistry; University of Stockholm; Sweden	Eriksson et al. 2008	Journal of Anthropological Archaeology 27 (2008): 520–543	https://doi.org/10.1016/j.jaa.2008.08.004
18	Sweden reference	Equus caballus	KOP188	Köpingsvik Öland	Sweden	Dentine		Holocene			-21.8	5.8			3.3	Department of Geology and Geochemistry; University of Stockholm; Sweden	Eriksson et al. 2008	Journal of Anthropological Archaeology 27 (2008): 520–543	https://doi.org/10.1016/j.jaa.2008.08.004
19	Sweden reference	Equus caballus	VÄS91	Västerbjers Gotland	Sweden	Dentine	Neolithic Pitted ware	Holocene			-21.8	4.6			3.3		Eriksson 2003	Eriksson G Doctoral dissertation 2003
20	Sweden reference	Equus caballus	VÄS92	Västerbjers Gotland	Sweden	Dentine	Neolithic Pitted ware	Holocene			-21.8	5.4			3.2		Eriksson 2003	Eriksson G Doctoral dissertation 2003
21	Norway reference	Equus caballus		Flakstad; Lofoten archipelago	Norway	Bone	Viking Age	Holocene			-22.3	4.9	38.5	14	3.2	Stable Isotope Laboratory (SIL); Department of Geological Sciences; Stockholm University; Sweden	Naumann et al. 2014	Journal of Archaeological Science 41 (2014): 533–540	https://doi.org/10.1016/j.jas.2013.08.022
22	Norway reference	Equus caballus		Flakstad; Lofoten archipelago	Norway	Bone	Viking Age	Holocene			-22.8	4.9	36.8	13.4	3.2	Stable Isotope Laboratory (SIL); Department of Geological Sciences; Stockholm University; Sweden	Naumann et al. 2014	Journal of Archaeological Science 41 (2014): 533–540	https://doi.org/10.1016/j.jas.2013.08.022
23	Denmark reference	Equus caballus	BOHEST1	Bofa/Tornegård	Denmark	Bone		Holocene			-22.7	6.1	42.6	15	3.3	Laboratory of Biological Anthropology Institute of Forensic Medicine University of Copenhagen Denmark	Jørkov et al. 2010	American Journal of Biological Anthropology 143:4 (2010): 523–533	https://doi.org/10.1002/ajpa.21346
24	Estonia reference	Equus caballus	KIA-55655	Lehmja (settlement)	Estonia	Bone	Iron Age (Late Iron Age)	Holocene	890	23	-21.7	5.2	41.5	15.4	3.1		Aguraiuja-Lätti et al. 2022	PLoS ONE 17(12): e0279583	https://doi.org/10.1371/journal.pone.0279583
25	Estonia reference	Equus caballus	KIA-55656	Rebala (settlement)	Estonia	Bone	Iron Age (Viking Age)	Holocene	1096	23	-21.7	5.2	43.3	16.2	3.1		Aguraiuja-Lätti et al. 2022	PLoS ONE 17(12): e0279583	https://doi.org/10.1371/journal.pone.0279583
26	Estonia reference	Equus caballus	KIA-55255	Pada (settlement)	Estonia	Bone	Iron Age (Viking Age)	Holocene	1193	19	-22	6.9	40.1	15.8	3		Aguraiuja-Lätti et al. 2022	PLoS ONE 17(12): e0279583	https://doi.org/10.1371/journal.pone.0279583
27	Estonia reference	Equus caballus	GUsi9817/Poz-135543	Valjala hill fort	Estonia	Bone	Iron Age (Late Iron Age)	Holocene	980	30	-23.1	4.9	43.7	14.6	3.5		Aguraiuja-Lätti et al. 2022	PLoS ONE 17(12): e0279583	https://doi.org/10.1371/journal.pone.0279583
28	Estonia reference	Equus caballus	KIA-55671	Sargvere (settlement)	Estonia	Bone	Medieval	Holocene	668	20	-21.8	5.7	41.2	15.2	3.2		Aguraiuja-Lätti et al. 2022	PLoS ONE 17(12): e0279583	https://doi.org/10.1371/journal.pone.0279583
29	Estonia reference	Equus caballus	GUsi10245	Otepää hill fort	Estonia	Bone	Iron Age (Pre-Viking/Viking/Late Iron Age)	Holocene			-22.3	4.6	41.9	13.6	3.6		Aguraiuja-Lätti et al. 2022	PLoS ONE 17(12): e0279583	https://doi.org/10.1371/journal.pone.0279583
30	Estonia reference	Equus caballus	KIA-55668	Hinniala hill fort	Estonia	Dentine	Iron Age (Pre-Viking Age)	Holocene	1501	20	-22.4	6.8	39	14.5	3.2		Aguraiuja-Lätti et al. 2022	PLoS ONE 17(12): e0279583	https://doi.org/10.1371/journal.pone.0279583
31	Estonia reference	Equus caballus	KIA-55263	Laossina (cemetery)	Estonia	Bone	Iron Age (Pre-Viking Age)	Holocene	1451	24	-20.9	10.3	40.6	15.1	3.2		Aguraiuja-Lätti et al. 2022	PLoS ONE 17(12): e0279583	https://doi.org/10.1371/journal.pone.0279583
32	Latvia reference	Equus caballus	Aiz1	Aizkraukle hillfort	Latvia	Bone	11th-13th C AD	Holocene			-22.7	5.6	41	14	3.3	Research Laboratory for Archaeology and the History of Art University of Oxford (RLAHA); UK	Gunnarssone et al. 2020	Estonian Journal of Archaeology 24:1 (2020): 45–69	https://doi.org/10.3176/arch.2020.1.02
33	Lithuania reference	Equus caballus/E. ferus	32	Šventoji 41B	Lithuania	Bone	Subneolithic	Holocene			-22.3	4.4	34	12.2	3.3		Piličiauskas et al 2017	Archaeological and Anthropological Sciences 9 (2017):1421-1437	https://doi.org/10.1007/s12520-017-0463-z
34	Lithuania reference	Equus caballus	2	Paduobe-Šaltaliūnė III 17	Lithuania	Dentine	263-530 cal AD	Holocene			-22.1	4.8			3.2	Centre for Physical Sciences and Technology, Vilnius	Piličiauskienė et al. 2022	Heritage (5): 332–352	https://doi.org/10.3390/heritage5010018
35	Lithuania reference	Equus caballus	3	Pagrybys 104	Lithuania	Dentine	580-668 cal AD	Holocene			-22.1	4.1			3.2	Centre for Physical Sciences and Technology, Vilnius	Piličiauskienė et al. 2022	Heritage (5): 332–352	https://doi.org/10.3390/heritage5010018
36	Lithuania reference	Equus caballus	4	Pagrybys 145	Lithuania	Dentine	601-662 cal AD	Holocene			-22.6	5.5			3.3	Centre for Physical Sciences and Technology, Vilnius	Piličiauskienė et al. 2022	Heritage (5): 332–352	https://doi.org/10.3390/heritage5010018
37	Lithuania reference	Equus caballus	5	Pagrybys 157	Lithuania	Dentine	540-640 cal AD	Holocene			-22.6	5.6			3.3	Centre for Physical Sciences and Technology, Vilnius	Piličiauskienė et al. 2022	Heritage (5): 332–352	https://doi.org/10.3390/heritage5010018
38	Lithuania reference	Equus caballus	6	Pagrybys 207	Lithuania	Dentine	565-654 cal AD	Holocene			-22.4	7.1			3.2	Centre for Physical Sciences and Technology, Vilnius	Piličiauskienė et al. 2022	Heritage (5): 332–352	https://doi.org/10.3390/heritage5010018
39	Lithuania reference	Equus caballus	7	Pavajuonis-Rėkučiai 6	Lithuania	Dentine	234-426 cal AD	Holocene			-24	7.4			3.2	Centre for Physical Sciences and Technology, Vilnius	Piličiauskienė et al. 2022	Heritage (5): 332–352	https://doi.org/10.3390/heritage5010018
40	Lithuania reference	Equus caballus	8	Plinkaigalis 2	Lithuania	Dentine	585-774 cal AD	Holocene			-23.1	4.8			3.2	Centre for Physical Sciences and Technology, Vilnius	Piličiauskienė et al. 2022	Heritage (5): 332–352	https://doi.org/10.3390/heritage5010018
41	Lithuania reference	Equus caballus	9	Plinkaigalis 3A	Lithuania	Dentine	574-651 cal AD	Holocene			-22.5	6			3.3	Centre for Physical Sciences and Technology, Vilnius	Piličiauskienė et al. 2022	Heritage (5): 332–352	https://doi.org/10.3390/heritage5010018
42	Lithuania reference	Equus caballus	10	Plinkaigalis 3B	Lithuania	Dentine	600-663 cal AD	Holocene			-22.6	7			3.3	Centre for Physical Sciences and Technology, Vilnius	Piličiauskienė et al. 2022	Heritage (5): 332–352	https://doi.org/10.3390/heritage5010018
43	Lithuania reference	Equus caballus	11	Taurapilis 4	Lithuania	Dentine	259-538 cal AD	Holocene			-21.9	5.5			3.2	Centre for Physical Sciences and Technology, Vilnius	Piličiauskienė et al. 2022	Heritage (5): 332–352	https://doi.org/10.3390/heritage5010018
44	Lithuania reference	Equus caballus	12	Taurapilis 5	Lithuania	Dentine	236-530 cal AD	Holocene			-22.4	5.5			3.3	Centre for Physical Sciences and Technology, Vilnius	Piličiauskienė et al. 2022	Heritage (5): 332–352	https://doi.org/10.3390/heritage5010018
45	Lithuania reference	Equus caballus	13	Taurapilis 6	Lithuania	Dentine	235-430 cal AD	Holocene			-22.8	5.4			3.1	Centre for Physical Sciences and Technology, Vilnius	Piličiauskienė et al. 2022	Heritage (5): 332–352	https://doi.org/10.3390/heritage5010018
46	Lithuania reference	Equus caballus	BE17	Mineikiškės	Lithuania	Bone	796-547 cal BC	Holocene			-21.02	5.97					Minkevičius et al. 2023	Archaeologia Baltica 30: 58-79	https://doi.org/10.15181/ab.v30i0.2564
47	Lithuania reference	Equus caballus		Anykščiai settlement site	Lithuania		426-584 cal AD	Holocene			-22.94	4.82				Centre for Physical Sciences and Technology, Vilnius	SI: Petrulis unpublished data; AMS: Petrulis 2024	AMS: Archeologiniai tyrinėjimai Lietuvoje 2023 metais	In press
48	Lithuania reference	Equus caballus		Anykščiai manor place	Lithuania		1426-1618 cal AD	Holocene			-21.86	6.45				Centre for Physical Sciences and Technology, Vilnius	SI: Petrulis unpublished data; AMS: Petrulis 2025	AMS: Archeologiniai tyrinėjimai Lietuvoje 2023 metais	In press
49	Russia reference	Equus caballus	347	Klin-Yar	Russia	Bone		Holocene			-20.4	5.27			3.2		Higham et al. 2010	Proceedings of the 20th International Radiocarbon Conference, edited by A J T Jull RADIOCARBON, Vol 52, Nr 2–3, 2010, p 653–670	https://doi.org/10.1017/S0033822200045689
50	Russia reference	Equus caballus	357	Klin-Yar	Russia	Bone		Holocene			-20.1	5.06			3.2		Higham et al. 2010	Proceedings of the 20th International Radiocarbon Conference, edited by A J T Jull RADIOCARBON, Vol 52, Nr 2–3, 2010, p 653–670	https://doi.org/10.1017/S0033822200045689
51	Russia reference	Equus caballus	360	Klin-Yar	Russia	Bone		Holocene			-20.3	4.89			3.2		Higham et al. 2010	Proceedings of the 20th International Radiocarbon Conference, edited by A J T Jull RADIOCARBON, Vol 52, Nr 2–3, 2010, p 653–670	https://doi.org/10.1017/S0033822200045689
52	Russia reference	Equus caballus	363	Klin-Yar	Russia	Bone		Holocene			-20.8	3.12			3.2		Higham et al. 2010	Proceedings of the 20th International Radiocarbon Conference, edited by A J T Jull RADIOCARBON, Vol 52, Nr 2–3, 2010, p 653–670	https://doi.org/10.1017/S0033822200045689
53	Russia reference	Equus caballus	367	Klin-Yar	Russia	Bone		Holocene			-21.1	2.36			3.2		Higham et al. 2010	Proceedings of the 20th International Radiocarbon Conference, edited by A J T Jull RADIOCARBON, Vol 52, Nr 2–3, 2010, p 653–670	https://doi.org/10.1017/S0033822200045689
54	Russia reference	Equus caballus	370	Klin-Yar	Russia	Bone		Holocene			-21	4.16			3.2		Higham et al. 2010	Proceedings of the 20th International Radiocarbon Conference, edited by A J T Jull RADIOCARBON, Vol 52, Nr 2–3, 2010, p 653–670	https://doi.org/10.1017/S0033822200045689
55	Russia reference	Equus caballus	371	Klin-Yar	Russia	Bone		Holocene			-21.1	2.69			3.2		Higham et al. 2010	Proceedings of the 20th International Radiocarbon Conference, edited by A J T Jull RADIOCARBON, Vol 52, Nr 2–3, 2010, p 653–670	https://doi.org/10.1017/S0033822200045689
56	Russia reference	Equus caballus	372	Klin-Yar	Russia	Bone		Holocene			-20.9	5.2			3.2		Higham et al. 2010	Proceedings of the 20th International Radiocarbon Conference, edited by A J T Jull RADIOCARBON, Vol 52, Nr 2–3, 2010, p 653–670	https://doi.org/10.1017/S0033822200045689
57	Russia reference	Equus caballus	372	Klin-Yar	Russia	Bone		Holocene			-20.6	3.74			3.2		Higham et al. 2010	Proceedings of the 20th International Radiocarbon Conference, edited by A J T Jull RADIOCARBON, Vol 52, Nr 2–3, 2010, p 653–670	https://doi.org/10.1017/S0033822200045689
58	Russia reference	Equus caballus	378	Klin-Yar	Russia	Bone		Holocene			-20.9	4.1			3.2		Higham et al. 2010	Proceedings of the 20th International Radiocarbon Conference, edited by A J T Jull RADIOCARBON, Vol 52, Nr 2–3, 2010, p 653–670	https://doi.org/10.1017/S0033822200045689
59	Russia reference	Equus caballus	388	Klin-Yar	Russia	Bone		Holocene			-21.1	4.26			3.2		Higham et al. 2010	Proceedings of the 20th International Radiocarbon Conference, edited by A J T Jull RADIOCARBON, Vol 52, Nr 2–3, 2010, p 653–670	https://doi.org/10.1017/S0033822200045689
60	Russia reference	Equus caballus	Ex1 Ch1	Klin-Yar	Russia	Bone		Holocene			-20.5	5.95			3.2		Higham et al. 2010	Proceedings of the 20th International Radiocarbon Conference, edited by A J T Jull RADIOCARBON, Vol 52, Nr 2–3, 2010, p 653–670	https://doi.org/10.1017/S0033822200045689
61	Russia reference	Equus caballus	KY III 341	Klin-Yar	Russia	Bone		Holocene	1428	28	-20.2	5.7			3.2		Higham et al. 2010	Proceedings of the 20th International Radiocarbon Conference, edited by A J T Jull RADIOCARBON, Vol 52, Nr 2–3, 2010, p 653–670	https://doi.org/10.1017/S0033822200045689
62	Russia reference	Equus caballus	KY III 357	Klin-Yar	Russia	Bone		Holocene	1497	28	-19.6	6			3.3		Higham et al. 2010	Proceedings of the 20th International Radiocarbon Conference, edited by A J T Jull RADIOCARBON, Vol 52, Nr 2–3, 2010, p 653–670	https://doi.org/10.1017/S0033822200045689
63	Russia reference	Equus caballus	KY III 360	Klin-Yar	Russia	Bone		Holocene	1345	29	-20.3	4.9			3.6		Higham et al. 2010	Proceedings of the 20th International Radiocarbon Conference, edited by A J T Jull RADIOCARBON, Vol 52, Nr 2–3, 2010, p 653–670	https://doi.org/10.1017/S0033822200045689
64	Russia reference	Equus caballus	KY III 361B	Klin-Yar	Russia	Bone		Holocene	1780	30	-20.2	3.8			3.2		Higham et al. 2010	Proceedings of the 20th International Radiocarbon Conference, edited by A J T Jull RADIOCARBON, Vol 52, Nr 2–3, 2010, p 653–670	https://doi.org/10.1017/S0033822200045689
65	Russia reference	Equus caballus	KY III 363B	Klin-Yar	Russia	Bone		Holocene	1411	28	-20.1	4.3					Higham et al. 2010	Proceedings of the 20th International Radiocarbon Conference, edited by A J T Jull RADIOCARBON, Vol 52, Nr 2–3, 2010, p 653–670	https://doi.org/10.1017/S0033822200045689
66	Russia reference	Equus caballus	KY III 378	Klin-Yar	Russia	Tooth		Holocene	1771	28	-20.4	4.1					Higham et al. 2010	Proceedings of the 20th International Radiocarbon Conference, edited by A J T Jull RADIOCARBON, Vol 52, Nr 2–3, 2010, p 653–670	https://doi.org/10.1017/S0033822200045689
67	Russia reference	Equus caballus	9/2	Abganerovo	Russia	Bone	700-600 BP	Holocene			-20.9	3.2	42.2	14.8	3.3		Iacumin et al. 2003	Geobios 37 (2004) 37–47	https://doi.org/10.1016/j.geobios.2003.05.001
68	Russia reference	Equus caballus	Ayg-2/22/16	Aygurskiy	Russia	Bone		Holocene			-20.3	6.9			3.1		Hollund et al. 2010	Journal of Archaeological Science 37:12 (2010) 2971-2983	https://doi.org/10.1016/j.jas.2010.08.009
69	Russia reference	Equus caballus	Ayg-2/22/19	Aygurskiy	Russia	Bone		Holocene			-20.3	10.2			3.2		Hollund et al. 2010	Journal of Archaeological Science 37:12 (2010) 2971-2983	https://doi.org/10.1016/j.jas.2010.08.009
70	Russia reference	Equus caballus	Gor 2/3/3	Goryadchevodskiy	Russia	Bone		Holocene			-19.5	7.4			3.3		Hollund et al. 2010	Journal of Archaeological Science 37:12 (2010) 2971-2983	https://doi.org/10.1016/j.jas.2010.08.009
71	Kazakhstan reference	Equus caballus	EA-SI-132	Taksai-1	Kazakhstan		IA	Holocene			-19.57	5.85	44.31	16.1	3.2		Ananyevskaya et al. 2020	Journal of Archaeological Science: Reports 34 (2020) 102615	https://doi.org/10.1016/j.jasrep.2020.102615
72	Kazakhstan reference	Equus caballus	EA-SI-134	Taksai-2	Kazakhstan		IA	Holocene			-19.83	7.18	43.6	15.29	3.3		Ananyevskaya et al. 2020	Journal of Archaeological Science: Reports 34 (2020) 102615	https://doi.org/10.1016/j.jasrep.2020.102615
73	Kazakhstan reference	Equus caballus	EA-SI-136	Taksai-2	Kazakhstan		IA	Holocene			-20.18	6	45.74	16.27	3.3		Ananyevskaya et al. 2020	Journal of Archaeological Science: Reports 34 (2020) 102615	https://doi.org/10.1016/j.jasrep.2020.102615
74	Kazakhstan reference	Equus caballus	EA-SI-137	Taksai-2	Kazakhstan		IA	Holocene			-19.75	8.23	45.74	16.27	3.3		Ananyevskaya et al. 2020	Journal of Archaeological Science: Reports 34 (2020) 102615	https://doi.org/10.1016/j.jasrep.2020.102615
75	Kazakhstan reference	Equus caballus	EA-SI-147	Taksai-3	Kazakhstan		IA	Holocene			-20.75	5.1	44.23	15.88	3.3		Ananyevskaya et al. 2020	Journal of Archaeological Science: Reports 34 (2020) 102615	https://doi.org/10.1016/j.jasrep.2020.102615
76	Kazakhstan reference	Equus caballus	EA-SI-149	Taksai-3	Kazakhstan		IA	Holocene			-21.02	5.57	41.04	13.61	3.5		Ananyevskaya et al. 2020	Journal of Archaeological Science: Reports 34 (2020) 102615	https://doi.org/10.1016/j.jasrep.2020.102615
77	Germany (wild) reference	Equus ferus		Hüde I	Germany	Bone	~6.15/5.95–4.75 ka cal B.P.	Holocene			-22.5409	4.24549	35.2585	12.7163	3.23417		Kveiborg et al. 2024	Palaeogeography, Palaeoclimatology, Palaeoecology 649 (2024) 112334	https://doi.org/10.1016/j.palaeo.2024.112334
78	Germany (wild) reference	Equus ferus		Hüde I	Germany	Bone	~6.15/5.95–4.75 ka cal B.P.	Holocene			-23.1035	4.33664	31.3	11.3392	3.22054		Kveiborg et al. 2024	Palaeogeography, Palaeoclimatology, Palaeoecology 649 (2024) 112334	https://doi.org/10.1016/j.palaeo.2024.112334
79	Germany (wild) reference	Equus ferus		Hüde I	Germany	Bone	~6.15/5.95–4.75 ka cal B.P.	Holocene			-22.2561	3.49367	41.7518	15.2715	3.18698		Kveiborg et al. 2024	Palaeogeography, Palaeoclimatology, Palaeoecology 649 (2024) 112334	https://doi.org/10.1016/j.palaeo.2024.112334
80	Germany (wild) reference	Equus ferus		Hüde I	Germany	Bone	~6.15/5.95–4.75 ka cal B.P.	Holocene			-23.2829	4.24848	35.0341	12.3122	3.31817		Kveiborg et al. 2024	Palaeogeography, Palaeoclimatology, Palaeoecology 649 (2024) 112334	https://doi.org/10.1016/j.palaeo.2024.112334
81	Belgium (wild) reference	Equus		Place Saint-Lambert (Liege)	Belgium	Bone		Holocene	6360	55	-23.3	5.9			3.3		Stevens & Hedges 2004	Quaternary Science Reviews 23 (2004) 977–991	https://doi.org/10.1016/j.quascirev.2003.06.024
82	Belgium (wild) reference	Equus		Place Saint-Lambert (Liege)	Belgium	Bone		Holocene	7970	80	-22.4	7.7			3.3		Stevens & Hedges 2004	Quaternary Science Reviews 23 (2004) 977–991	https://doi.org/10.1016/j.quascirev.2003.06.024
83	United Kingdom (wild) reference	Equus		Flixton 2	Great Britain	Bone		Holocene	9160	80	-20.3	5.6			3.6		Stevens & Hedges 2004	Quaternary Science Reviews 23 (2004) 977–991	https://doi.org/10.1016/j.quascirev.2003.06.024
84	Denmark (wild) reference	Equus caballus		Ginnerup, A4 (2020)	Denmark	Bone	5.1 and 4.9 ka cal BP by 14C	Holocene	4386	25	-21.4854	3.12879	30.9958	11.0738	3.26422		Klassen et al. 2023	Journal of Neolithic Archaeology (2023) 25:35 – 65	https://doi.org/10.12766/jna.2023.2
85	Denmark (wild) reference	Equus caballus		Ginnerup, A4 (2020)	Denmark	Bone	5.1 and 4.9 ka cal BP by 14C	Holocene	4352	26	-22.0102	3.24082	30.9409	10.8808	3.31679		Klassen et al. 2023	Journal of Neolithic Archaeology (2023) 25:35 – 65	https://doi.org/10.12766/jna.2023.2
86	Denmark (wild) reference	Equus caballus		Ginnerup A1 (trail)	Denmark	Bone	~5.45 and 4.9 ka cal B.P by 14C	Holocene			-22	3.28	44.8	16.3	3.21658		Makarewicz 2023	Journal of Archaeological Science 158 (2023) 105689	https://doi.org/10.1016/j.jas.2022.105689
87	Denmark (wild) reference	Equus caballus		Ginnerup A4 (trail)	Denmark	Bone	5.1 and 4.9 ka cal BP by 14C	Holocene			-22.59	3.19	44	15.8	3.28985		Makarewicz 2023	Journal of Archaeological Science 158 (2023) 105689	https://doi.org/10.1016/j.jas.2022.105689
