# Supplementary material for: Feeding of prehistoric and historic horses at the eastern Baltic Sea region and western Russia
Source: Research Square preprint supplement (doi:10.21203/rs.3.rs-7044177/v1), 2025-07-15
Supplement: Supplementary file 2 [file 81a73e903388c8dad11ab062.xlsx]

## Sheet: Sheet 1
Supplementary Table 2. Archaeological bones and teeth of domestic and wild animals used as references from dIANA batabase (Dietary Isotopic Baseline for the Ancient North) or publications with stable isotope ratios of carbon (δ13C) and nitrogen (δ15N) measured. The samples are grouped by species with goats and sheeps grouped to Ovicaprid, pig and wild boar group together as well as domestic and w…
Nro	Group	Species	Id	Site	Country	Material	Phase	14C age yr BP	Standard deviation	δ13C (‰)	δ15N (‰)	% C	% N	C/N atomic ratio	Authors	Publication	DOI/Website
1	Cattle	Bos taurus	363	Klin-Yar	Russia	Bone				-17.5	9.76			3.2	Higham et al. 2010	Proceedings of the 20th International Radiocarbon Conference, edited by A J T Jull RADIOCARBON, Vol 52, Nr 2–3, 2010, p 653–670	https://doi.org/10.1017/S0033822200045689
2	Cattle	Bos taurus	366	Klin-Yar	Russia	Bone				-18.3	6.18			3.2	Higham et al. 2010	Proceedings of the 20th International Radiocarbon Conference, edited by A J T Jull RADIOCARBON, Vol 52, Nr 2–3, 2010, p 653–670	https://doi.org/10.1017/S0033822200045689
3	Cattle	Bos taurus	384	Klin-Yar	Russia	Bone				-20.4	6.21			3.2	Higham et al. 2010	Proceedings of the 20th International Radiocarbon Conference, edited by A J T Jull RADIOCARBON, Vol 52, Nr 2–3, 2010, p 653–670	https://doi.org/10.1017/S0033822200045689
4	Cattle	Bos taurus	Koban Sq 1 Bldg 1	Klin-Yar	Russia	Bone				-19	7.8			3.3	Higham et al. 2010	Proceedings of the 20th International Radiocarbon Conference, edited by A J T Jull RADIOCARBON, Vol 52, Nr 2–3, 2010, p 653–670	https://doi.org/10.1017/S0033822200045689
5	Cattle	Bos taurus	Koban Sq 1 Bldg 3	Klin-Yar	Russia	Bone				-18.8	7.3			3.3	Higham et al. 2010	Proceedings of the 20th International Radiocarbon Conference, edited by A J T Jull RADIOCARBON, Vol 52, Nr 2–3, 2010, p 653–670	https://doi.org/10.1017/S0033822200045689
6	Cattle	Bos taurus	KY III 360	Klin-Yar	Russia	Bone		1356	28	-19.7	5.1			3.5	Higham et al. 2010	Proceedings of the 20th International Radiocarbon Conference, edited by A J T Jull RADIOCARBON, Vol 52, Nr 2–3, 2010, p 653–670	https://doi.org/10.1017/S0033822200045689
7	Cattle	Bos taurus	KY III 361A	Klin-Yar	Russia	Bone		2981	31	-18.8	7.5			3.2	Higham et al. 2010	Proceedings of the 20th International Radiocarbon Conference, edited by A J T Jull RADIOCARBON, Vol 52, Nr 2–3, 2010, p 653–670	https://doi.org/10.1017/S0033822200045689
8	Cattle	Bos taurus	R-19	Abganerovo	Russia	Bone	3750-3650 BP			-19.2	8.2	37.7	13.6	3.2	Iacumin et al. 2003	Geobios 37 (2004) 37–47	https://doi.org/10.1016/j.geobios.2003.05.001
9	Cattle	Bos taurus	R-11	Abganerovo	Russia	Bone	3950-3750 BP			-19.8	5.6	38.3	14.5	3.1	Iacumin et al. 2003	Geobios 37 (2004) 37–47	https://doi.org/10.1016/j.geobios.2003.05.001
10	Cattle	Bos taurus	8/5	Black Sea coast	Russia	Bone	6000 BP			-20.6	4.1	31.4	10.7	3.4	Iacumin et al. 2003	Geobios 37 (2004) 37–47	https://doi.org/10.1016/j.geobios.2003.05.001
11	Cattle	Bos taurus	8/6	Black Sea coast	Russia	Bone	6000 BP			-20.6	4.1	32.1	12.2	3.2	Iacumin et al. 2003	Geobios 37 (2004) 37–47	https://doi.org/10.1016/j.geobios.2003.05.001
12	Cattle	Bos taurus	VeA1/V/2	Velikent	Russia	Bone				-20.61	7.14			3.14	Hollund et al. 2010	Journal of Archaeological Science 37:12 (2010) 2971-2983	https://doi.org/10.1016/j.jas.2010.08.009
13	Cattle	Bos taurus	VeA3/III/11	Velikent	Russia	Bone				-18.58	6.14			3.19	Hollund et al. 2010	Journal of Archaeological Science 37:12 (2010) 2971-2983	https://doi.org/10.1016/j.jas.2010.08.010
14	Cattle	Bos taurus	VeA4/III/11	Velikent	Russia	Bone				-19.77	6.83			3.14	Hollund et al. 2010	Journal of Archaeological Science 37:12 (2010) 2971-2983	https://doi.org/10.1016/j.jas.2010.08.011
15	Cattle	Bos taurus	VeA5/III/11	Velikent	Russia	Bone				-19.53	7.26			3.18	Hollund et al. 2010	Journal of Archaeological Science 37:12 (2010) 2971-2983	https://doi.org/10.1016/j.jas.2010.08.012
16	Cattle	Bos taurus	VeA6/III/11	Velikent	Russia	Bone				-18.29	7.99			3.15	Hollund et al. 2010	Journal of Archaeological Science 37:12 (2010) 2971-2983	https://doi.org/10.1016/j.jas.2010.08.013
17	Cattle	Bos taurus	VeA7/III/11	Velikent	Russia	Bone				-19.85	6.97			3.16	Hollund et al. 2010	Journal of Archaeological Science 37:12 (2010) 2971-2983	https://doi.org/10.1016/j.jas.2010.08.014
18	Cattle	Bos taurus	VeA8/II	Velikent	Russia	Bone				-21.07	7.04			3.22	Hollund et al. 2010	Journal of Archaeological Science 37:12 (2010) 2971-2983	https://doi.org/10.1016/j.jas.2010.08.015
19	Cattle	Bos taurus	VeA10/II	Velikent	Russia	Bone				-19.14	8.58			3.21	Hollund et al. 2010	Journal of Archaeological Science 37:12 (2010) 2971-2983	https://doi.org/10.1016/j.jas.2010.08.016
20	Cattle	Bos taurus	VeA11/II	Velikent	Russia	Bone				-19.96	5.91			3.18	Hollund et al. 2010	Journal of Archaeological Science 37:12 (2010) 2971-2983	https://doi.org/10.1016/j.jas.2010.08.017
21	Cattle	Bos taurus	VeA13/II	Velikent	Russia	Bone				-19.23	9.25			3.16	Hollund et al. 2010	Journal of Archaeological Science 37:12 (2010) 2971-2983	https://doi.org/10.1016/j.jas.2010.08.018
22	Cattle	Bos taurus	VeA14/III	Velikent	Russia	Bone				-19.84	7.56			3.17	Hollund et al. 2010	Journal of Archaeological Science 37:12 (2010) 2971-2983	https://doi.org/10.1016/j.jas.2010.08.019
23	Cattle	Bos taurus	VeA16/III	Velikent	Russia	Bone				-19.2	6.25			3.2	Hollund et al. 2010	Journal of Archaeological Science 37:12 (2010) 2971-2983	https://doi.org/10.1016/j.jas.2010.08.020
24	Cattle	Bos taurus	VeA17/III	Velikent	Russia	Bone				-20.2	6.93			3.17	Hollund et al. 2010	Journal of Archaeological Science 37:12 (2010) 2971-2983	https://doi.org/10.1016/j.jas.2010.08.021
25	Cattle	Bos taurus	VeA20/II	Velikent	Russia	Bone				-20.12	7.82			3.16	Hollund et al. 2010	Journal of Archaeological Science 37:12 (2010) 2971-2983	https://doi.org/10.1016/j.jas.2010.08.022
26	Cattle	Bos taurus	VeA22/II	Velikent	Russia	Bone				-20.28	8.95			3.19	Hollund et al. 2010	Journal of Archaeological Science 37:12 (2010) 2971-2983	https://doi.org/10.1016/j.jas.2010.08.023
27	Cattle	Bos taurus	6917	Turlojiškė	Lithuania	bone	Late bronze			-21.1	7.4			3.2	Antanaitis-Jacobs et al 2009	Archaeologia Baltica 12 (2009): 12–30
28	Cattle	Bos taurus		Žemaitiškė 2	Lithuania	bone	Subneolithic			-22.7	4.8	40.5	14.7	3.2	Piličiauskas et al 2017a	Journal of Archaological Science: Reports 14 (2017): 530–542	https://doi.org/10.1016/j.jasrep.2017.06.004
29	Cattle	Bos taurus	ŽPVR 31	The lower castle of Vilnius and The Palace of the Grand Dukes of Lithuania; Vilnius	Lithuania	bone	16–17th C AD			-21.6	7.3	40.8	14.8	3.2	Simčenka et al 2020	Archaeological and Anthropological Sciences 12 (2020): 1–14	https://doi.org/10.1007/s12520-020-01063-9
30	Cattle	Bos taurus	ŽPVR 48	The lower castle of Vilnius and The Palace of the Grand Dukes of Lithuania; Vilnius	Lithuania	bone	17th C AD			-22.1	6.6	43.5	15.8	3.2	Simčenka et al 2020	Archaeological and Anthropological Sciences 12 (2020): 1–14	https://doi.org/10.1007/s12520-020-01063-9
31	Cattle	Bos taurus	ŽPVR 49	The lower castle of Vilnius and The Palace of the Grand Dukes of Lithuania; Vilnius	Lithuania	bone	17th C AD			-21.9	7.9	41.2	14.8	3.2	Simčenka et al 2020	Archaeological and Anthropological Sciences 12 (2020): 1–14	https://doi.org/10.1007/s12520-020-01063-9
32	Cattle	Bos taurus	Aiz2	Aizkraukle hillfort	Latvia	bone	11th-13th C AD			-23.3	5.5	44	16	3.2	Gunnarssone et al 2020	Estonian Journal of Archaeology 24:1 (2020): 45–69	https://doi.org/10.3176/arch.2020.1.02
33	Cattle	Bos taurus	LTL29	Tallinn Tartu St (EKA)	Estonia	dentine	15th to 16th AD layers			-21.9	5.7			3.2	Lightfoot et al 2016	Estonian Journal of Archaeology 20:1 (2016): 8–107	https://doi.org/10.3176/arch.2016.1.04
34	Cattle	Bos taurus	LTL30	Tallinn Tartu St (EKA)	Estonia	dentine	15th to 16th AD layers			-21.9	6.3			3.2	Lightfoot et al 2016	Estonian Journal of Archaeology 20:1 (2016): 8–107	https://doi.org/10.3176/arch.2016.1.04
35	Cattle	Bos taurus	LTL31	Tallinn Tartu St (EKA)	Estonia	dentine	15th to 16th AD layers			-21.6	5.3			3.1	Lightfoot et al 2016	Estonian Journal of Archaeology 20:1 (2016): 8–107	https://doi.org/10.3176/arch.2016.1.04
36	Cattle	Bos taurus	LTL36	Tallinn Tartu St (EKA)	Estonia	dentine	15th to 16th AD layers			-21.9	5.9			3.2	Lightfoot et al 2016	Estonian Journal of Archaeology 20:1 (2016): 8–107	https://doi.org/10.3176/arch.2016.1.04
37	Cattle	Bos taurus	KIA-54594	Kukruse (cemetery)	Estonia	dentine	Iron Age (Viking Age)	1177	22	-21.2	6.6	41.6	15.4	3.1	Aguraiuja-Lätti et al. 2022	PLoS ONE 17(12): e0279583	https://doi.org/10.1371/journal.pone.0279583
38	Cattle	Bos taurus	KIA-54596	Kukruse (cemetery)	Estonia	dentine	Medieval	491	22	-20.8	6.9	41.7	15.6	3.1	Aguraiuja-Lätti et al. 2022	PLoS ONE 17(12): e0279583	https://doi.org/10.1371/journal.pone.0279583
39	Cattle	Bos taurus	KIA-54041	Kõpu XIV (settlement)	Estonia	dentine	Early Modern	298	23	-21.6	5.5	38.6	14.4	3.1	Aguraiuja-Lätti et al. 2022	PLoS ONE 17(12): e0279583	https://doi.org/10.1371/journal.pone.0279583
40	Cattle	Bos taurus	KIA-55032	Nurmsi (cemetery)	Estonia	dentine	Iron Age (Viking Age/Late Iron Age)	1006	20	-21.6	6	39.7	14.6	3.2	Aguraiuja-Lätti et al. 2022	PLoS ONE 17(12): e0279583	https://doi.org/10.1371/journal.pone.0279583
41	Cattle	Bos taurus	KIA-55036	Nurmsi (cemetery)	Estonia	dentine	Early Modern	345	19	-22	6.8	39.2	14.4	3.2	Aguraiuja-Lätti et al. 2022	PLoS ONE 17(12): e0279583	https://doi.org/10.1371/journal.pone.0279583
42	Cattle	Bos taurus	GUsi9202	Tallinn, Sauna St 10	Estonia	bone	Medieval			-21.2	4.9	37.9	13.6	3.3	Aguraiuja-Lätti et al. 2022	PLoS ONE 17(12): e0279583	https://doi.org/10.1371/journal.pone.0279583
43	Cattle	Bos taurus	GUsi9203	Tallinn, Sauna St 10	Estonia	bone	Medieval			-21.9	5.6	37.2	13.3	3.3	Aguraiuja-Lätti et al. 2022	PLoS ONE 17(12): e0279583	https://doi.org/10.1371/journal.pone.0279583
44	Cattle	Bos taurus	GUsi9204	Tallinn, Sauna St 10	Estonia	bone	Medieval			-22.4	3.9	39.8	13.9	3.3	Aguraiuja-Lätti et al. 2022	PLoS ONE 17(12): e0279583	https://doi.org/10.1371/journal.pone.0279583
45	Cattle	Bos taurus	GUsi9210	Tallinn, Vabaduse Sq	Estonia	bone	Medieval			-22.5	4.5	42.4	14.7	3.4	Aguraiuja-Lätti et al. 2022	PLoS ONE 17(12): e0279583	https://doi.org/10.1371/journal.pone.0279583
46	Cattle	Bos taurus	GUsi9211	Tallinn, Vabaduse Sq	Estonia	bone	Medieval			-22.5	5	39.6	14	3.3	Aguraiuja-Lätti et al. 2022	PLoS ONE 17(12): e0279583	https://doi.org/10.1371/journal.pone.0279583
47	Cattle	Bos taurus	GUsi9212	Tallinn, Vabaduse Sq	Estonia	bone	Medieval			-23	5.5	32.3	11.2	3.4	Aguraiuja-Lätti et al. 2022	PLoS ONE 17(12): e0279583	https://doi.org/10.1371/journal.pone.0279583
48	Cattle	Bos taurus	GUsi9226	Tallinn, Jahu St 6	Estonia	bone	Medieval			-21.9	5.9	27	9.6	3.3	Aguraiuja-Lätti et al. 2022	PLoS ONE 17(12): e0279583	https://doi.org/10.1371/journal.pone.0279583
49	Cattle	Bos taurus	GUsi9227	Tallinn, Jahu St 6	Estonia	bone	Medieval			-22.2	5	28.8	10.2	3.3	Aguraiuja-Lätti et al. 2022	PLoS ONE 17(12): e0279583	https://doi.org/10.1371/journal.pone.0279583
50	Cattle	Bos taurus	GUsi9231	Tallinn, Jahu St 6	Estonia	bone	Medieval			-21.2	4.9	26.2	9.5	3.2	Aguraiuja-Lätti et al. 2022	PLoS ONE 17(12): e0279583	https://doi.org/10.1371/journal.pone.0279583
51	Cattle	Bos taurus	GUsi9801	Tallinn, Härjapea	Estonia	bone	Medieval			-21.8	5.5	44.9	15.5	3.4	Aguraiuja-Lätti et al. 2022	PLoS ONE 17(12): e0279583	https://doi.org/10.1371/journal.pone.0279583
52	Cattle	Bos taurus	GUsi9803/Poz-134118	Lehmja (settlement)	Estonia	bone	Medieval	480	30	-21.4	5.8	44	15.6	3.3	Aguraiuja-Lätti et al. 2022	PLoS ONE 17(12): e0279583	https://doi.org/10.1371/journal.pone.0279583
53	Cattle	Bos taurus	GUsi9804	Lehmja (settlement)	Estonia	bone	Medieval			-21.9	5.5	36	12.6	3.3	Aguraiuja-Lätti et al. 2022	PLoS ONE 17(12): e0279583	https://doi.org/10.1371/journal.pone.0279583
54	Cattle	Bos taurus	GUsi9805	Lehmja (settlement)	Estonia	bone	Medieval			-21.6	4.9	43.3	15	3.4	Aguraiuja-Lätti et al. 2022	PLoS ONE 17(12): e0279583	https://doi.org/10.1371/journal.pone.0279583
55	Cattle	Bos taurus	GUsi10855	Lehmja (settlement)	Estonia	bone	Medieval			-21.5	4.6	40.1	13.8	3.4	Aguraiuja-Lätti et al. 2022	PLoS ONE 17(12): e0279583	https://doi.org/10.1371/journal.pone.0279583
56	Cattle	Bos taurus	GUsi10856	Lehmja (settlement)	Estonia	bone	Medieval			-21.4	7	43.2	14.3	3.5	Aguraiuja-Lätti et al. 2022	PLoS ONE 17(12): e0279583	https://doi.org/10.1371/journal.pone.0279583
57	Cattle	Bos taurus	GUsi10857	Lehmja (settlement)	Estonia	bone	Medieval			-21.9	6.3	41.8	14.2	3.4	Aguraiuja-Lätti et al. 2022	PLoS ONE 17(12): e0279583	https://doi.org/10.1371/journal.pone.0279583
58	Cattle	Bos taurus	GUsi10858	Lehmja (settlement)	Estonia	bone	Medieval			-21.7	5.1	36.6	12.5	3.4	Aguraiuja-Lätti et al. 2022	PLoS ONE 17(12): e0279583	https://doi.org/10.1371/journal.pone.0279583
59	Cattle	Bos taurus	GUsi9808	Rebala (settlement)	Estonia	bone	Medieval			-21.4	5.5	41.6	14.5	3.3	Aguraiuja-Lätti et al. 2022	PLoS ONE 17(12): e0279583	https://doi.org/10.1371/journal.pone.0279583
60	Cattle	Bos taurus	GUsi9809/Poz-134119	Rebala (settlement)	Estonia	bone	Medieval	530	30	-21.9	7.1	32.2	11.2	3.3	Aguraiuja-Lätti et al. 2022	PLoS ONE 17(12): e0279583	https://doi.org/10.1371/journal.pone.0279583
61	Cattle	Bos taurus	KIA-55650	Jõelähtme Teemeistri (stone-cist graves)	Estonia	bone	Iron Age (Viking Age/Late Iron Age)	967	23	-21.4	4.3	40.2	15.1	3.1	Aguraiuja-Lätti et al. 2022	PLoS ONE 17(12): e0279583	https://doi.org/10.1371/journal.pone.0279583
62	Cattle	Bos taurus	KIA-55258	Muuksi (cemetery)	Estonia	bone	Iron Age (Migration Period)	1616	26	-22.4	7.7	40	15	3.1	Aguraiuja-Lätti et al. 2022	PLoS ONE 17(12): e0279583	https://doi.org/10.1371/journal.pone.0279583
63	Cattle	Bos taurus	KIA-55254	Pada (settlement)	Estonia	bone	Iron Age (Viking Age)	1215	28	-21.8	6.1	38.3	14.3	3.1	Aguraiuja-Lätti et al. 2022	PLoS ONE 17(12): e0279583	https://doi.org/10.1371/journal.pone.0279583
64	Cattle	Bos taurus	GUsi10244/Poz-134222	Valjala hill fort	Estonia	bone	Medieval	495	30	-21.2	5.2	42.1	14.4	3.4	Aguraiuja-Lätti et al. 2022	PLoS ONE 17(12): e0279583	https://doi.org/10.1371/journal.pone.0279583
65	Cattle	cf. Bos taurus	GUsi10832/Poz-135549	Pöide hill fort	Estonia	bone	Iron Age (Late Iron Age)	790	30	-20.9	4.9	41.4	14.4	3.3	Aguraiuja-Lätti et al. 2022	PLoS ONE 17(12): e0279583	https://doi.org/10.1371/journal.pone.0279583
66	Cattle	cf. Bos taurus	GUsi10847/Poz-135553	Pöide hill fort	Estonia	bone	Iron Age (Pre-Viking Age)	1300	30	-21.1	5.4	42.6	14.1	3.5	Aguraiuja-Lätti et al. 2022	PLoS ONE 17(12): e0279583	https://doi.org/10.1371/journal.pone.0279583
67	Cattle	Bos taurus	GUsi10455/Poz-126138	Salme	Estonia	bone	Early Modern	305	30	-22.2	5	35.5	12.2	3.4	Aguraiuja-Lätti et al. 2022	PLoS ONE 17(12): e0279583	https://doi.org/10.1371/journal.pone.0279583
68	Cattle	Bos taurus	GUsi10818	Pärnu, Põhja Blvd	Estonia	bone	Medieval			-22.2	5.9	40.3	13.9	3.4	Aguraiuja-Lätti et al. 2022	PLoS ONE 17(12): e0279583	https://doi.org/10.1371/journal.pone.0279583
69	Cattle	Bos taurus	GUsi10819	Pärnu, Põhja Blvd	Estonia	bone	Medieval			-22	5	26.7	9.5	3.3	Aguraiuja-Lätti et al. 2022	PLoS ONE 17(12): e0279583	https://doi.org/10.1371/journal.pone.0279583
70	Cattle	Bos taurus	GUsi10820	Pärnu, Põhja Blvd	Estonia	bone	Medieval			-22	6.6	20.3	7.4	3.2	Aguraiuja-Lätti et al. 2022	PLoS ONE 17(12): e0279583	https://doi.org/10.1371/journal.pone.0279583
71	Cattle	Bos taurus	GUsi10821	Pärnu, Põhja Blvd	Estonia	bone	Early Modern			-21.9	4.9	29.3	10.3	3.3	Aguraiuja-Lätti et al. 2022	PLoS ONE 17(12): e0279583	https://doi.org/10.1371/journal.pone.0279583
72	Cattle	Bos taurus	GUsi10813	Rakvere, Pikk St	Estonia	bone	Early Modern			-22.1	5.8	38.9	13.2	3.4	Aguraiuja-Lätti et al. 2022	PLoS ONE 17(12): e0279583	https://doi.org/10.1371/journal.pone.0279583
73	Cattle	Bos taurus	KIA-54590	Rakvere, Pikk St	Estonia	bone	Early Modern	340	24	-21.6	4.9	41.6	15.5	3.1	Aguraiuja-Lätti et al. 2022	PLoS ONE 17(12): e0279583	https://doi.org/10.1371/journal.pone.0279583
74	Cattle	Bos taurus	KIA-54591	Rakvere, Pikk St	Estonia	bone	Medieval	601	24	-20.9	5.7	42.2	15.8	3.1	Aguraiuja-Lätti et al. 2022	PLoS ONE 17(12): e0279583	https://doi.org/10.1371/journal.pone.0279583
75	Cattle	Bos taurus	KIA-55267	Varbola hill fort	Estonia	bone	Iron Age (Late Iron Age)	801	23	-20.1	10.1	39.1	14.6	3.1	Aguraiuja-Lätti et al. 2022	PLoS ONE 17(12): e0279583	https://doi.org/10.1371/journal.pone.0279583
76	Cattle	Bos taurus	KIA-55050	Soontagana hill fort	Estonia	bone	Iron Age (Late Iron Age)	887	25	-21.3	4.8	40.3	15.1	3.1	Aguraiuja-Lätti et al. 2022	PLoS ONE 17(12): e0279583	https://doi.org/10.1371/journal.pone.0279583
77	Cattle	Bos taurus	GUsi10837	Sargvere (settlement)	Estonia	bone	Medieval			-22.7	5.7	41.1	13	3.7	Aguraiuja-Lätti et al. 2022	PLoS ONE 17(12): e0279583	https://doi.org/10.1371/journal.pone.0279583
78	Cattle	Bos taurus	GUsi10838	Sargvere (settlement)	Estonia	bone	Medieval			-21.9	6.4	41.4	14.2	3.4	Aguraiuja-Lätti et al. 2022	PLoS ONE 17(12): e0279583	https://doi.org/10.1371/journal.pone.0279583
79	Cattle	Bos taurus	GUsi10839	Sargvere (settlement)	Estonia	bone	Medieval			-22.4	6.1	40.3	14.4	3.3	Aguraiuja-Lätti et al. 2022	PLoS ONE 17(12): e0279583	https://doi.org/10.1371/journal.pone.0279583
80	Cattle	Bos taurus	KIA-55037	Tarbja (cemetery)	Estonia	bone	Iron Age (Late Iron Age)	889	20	-22	4.7	40.8	14.8	3.2	Aguraiuja-Lätti et al. 2022	PLoS ONE 17(12): e0279583	https://doi.org/10.1371/journal.pone.0279583
81	Cattle	Bos taurus	KIA-55059	Kunila (cemetery)	Estonia	bone	Early Modern	348	24	-22.1	7.7	39.7	14.7	3.2	Aguraiuja-Lätti et al. 2022	PLoS ONE 17(12): e0279583	https://doi.org/10.1371/journal.pone.0279583
82	Cattle	Bos taurus	GUsi9821	Otepää hill fort	Estonia	bone	Iron Age (Pre-Viking/Viking/Late Iron Age)			-22	5.9	42.3	14.4	3.4	Aguraiuja-Lätti et al. 2022	PLoS ONE 17(12): e0279583	https://doi.org/10.1371/journal.pone.0279583
83	Cattle	Bos taurus	KIA-55056	Otepää hill fort	Estonia	bone	Medieval	803	25	-21.9	8	41.7	15.5	3.1	Aguraiuja-Lätti et al. 2022	PLoS ONE 17(12): e0279583	https://doi.org/10.1371/journal.pone.0279583
84	Cattle	Bos taurus	GUsi10223	Tartu, Jakobi St 2	Estonia	bone	Medieval			-21.9	3.8	42.5	14.2	3.5	Aguraiuja-Lätti et al. 2022	PLoS ONE 17(12): e0279583	https://doi.org/10.1371/journal.pone.0279583
85	Cattle	Bos taurus	GUsi10228	Tartu, Lutsu St 12	Estonia	bone	Medieval			-22	5.7	44.5	15.7	3.3	Aguraiuja-Lätti et al. 2022	PLoS ONE 17(12): e0279583	https://doi.org/10.1371/journal.pone.0279583
86	Cattle	Bos taurus	GUsi10235	Viljandi, Pikk St 4	Estonia	bone	Medieval			-21.7	5.3	42.1	14.9	3.3	Aguraiuja-Lätti et al. 2022	PLoS ONE 17(12): e0279583	https://doi.org/10.1371/journal.pone.0279583
87	Cattle	Bos taurus	GUsi10242	Viljandi Museum yard	Estonia	bone	Medieval			-21.3	5.5	44.9	15.4	3.4	Aguraiuja-Lätti et al. 2022	PLoS ONE 17(12): e0279583	https://doi.org/10.1371/journal.pone.0279583
88	Cattle	Bos taurus	GUsi10483	Viljandi Castle	Estonia	bone	Medieval			-22.3	5.1	40.6	14	3.4	Aguraiuja-Lätti et al. 2022	PLoS ONE 17(12): e0279583	https://doi.org/10.1371/journal.pone.0279583
89	Cattle	Bos taurus	GUsi10484	Viljandi Castle	Estonia	bone	Medieval			-22	6.3	42.3	14.8	3.3	Aguraiuja-Lätti et al. 2022	PLoS ONE 17(12): e0279583	https://doi.org/10.1371/journal.pone.0279583
90	Cattle	Bos taurus	GUsi10809	Vastseliina Castle	Estonia	bone	Early Modern			-22.4	6.7	42.4	13.6	3.6	Aguraiuja-Lätti et al. 2022	PLoS ONE 17(12): e0279583	https://doi.org/10.1371/journal.pone.0279583
91	Cattle	Bos taurus	AAR-4452/KML 49.5/76.0: 5038	Åkonge	Denmark	bone		5120	40	-22	4.3			3.1	Fischer et al 2007	Journal of Archaeological Science 34 (2007): 2125–2150	https://doi.org/10.1016/j.jas.2007.02.028
92	Cattle	Bos taurus	AAR-6945/34768	Bodal C	Denmark	bone		5110	40	-21.4	5			3.3	Fischer et al 2007	Journal of Archaeological Science 34 (2007): 2125–2150	https://doi.org/10.1016/j.jas.2007.02.028
93	Cattle	Bos taurus	BOOXE2	Bofa/Tornegård	Denmark	bone				-21.4	5.4	41.8	14.4	3.4	Jørkov et al 2010	American Journal of Biological Anthropology 143:4 (2010): 523–533	https://doi.org/10.1002/ajpa.21346
94	Cattle	Bos taurus	HIOXE	Himlingøje	Denmark	bone				-21.9	5.3	43.6	16.2	3.1	Jørkov et al 2010	American Journal of Biological Anthropology 143:4 (2010): 523–533	https://doi.org/10.1002/ajpa.21346
95	Cattle	Bos taurus	Husede I	Husede; Sealand	Denmark	bone		4510	90	-21.9	4.5			3.05	Noe-Nygaard et al 2005	Journal of Archaeological Science 32 (2005): 855–871	https://doi.org/10.1016/j.jas.2005.01.004
96	Cattle	Bos taurus	K-4979/BCH200: 20+40	Ulkestrup Lyng M	Denmark	bone		4630	85	-22.5	5			3.3	Fischer et al 2007	Journal of Archaeological Science 34 (2007): 2125–2150	https://doi.org/10.1016/j.jas.2007.02.028
97	Cattle	Bos taurus	KAOXE3	Kassebjerggård	Denmark					-21.5	6.2	41	14.1	3.4	Jørkov et al 2010	American Journal of Biological Anthropology 143:4 (2010): 523–533	https://doi.org/10.1002/ajpa.21346
98	Cattle	Bos taurus	KML Åmosen 50.0/79.5:4	KLM Åmosen; Sealand	Denmark	bone		5120	65	-21.5	4.4			2.93	Noe-Nygaard et al 2005	Journal of Archaeological Science 32 (2005): 855–871	https://doi.org/10.1016/j.jas.2005.01.004
99	Cattle	Bos taurus	Muldbjerg Mul-I 41247	Muldbjerg Mul; Sealand	Denmark	bone	late Atlantic/Early Subboreal	5050	50	-21.7	5.5			3.57	Noe-Nygaard et al 2005	Journal of Archaeological Science 32 (2005): 855–871	https://doi.org/10.1016/j.jas.2005.01.004
100	Cattle	Bos taurus	Muldbjerg Mul-I 690	Muldbjerg Mul; Sealand	Denmark	bone	late Atlantic/Early Subboreal	5050	50	-21.5	5			3.16	Noe-Nygaard et al 2005	Journal of Archaeological Science 32 (2005): 855–871	https://doi.org/10.1016/j.jas.2005.01.004
101	Cattle	Bos taurus	Sandhuse C-LXIV	Sandhuse; Sealand	Denmark	bone		2665	65	-21.7	5.8			2.98	Noe-Nygaard et al 2005	Journal of Archaeological Science 32 (2005): 855–871	https://doi.org/10.1016/j.jas.2005.01.004
102	Cattle	Bos taurus	Sandhuse Mose (Okse I)	Sandhuse Mose (Okse I); Sealand	Denmark	bone		4530	70	-21.5	7.2			2.89	Noe-Nygaard et al 2005	Journal of Archaeological Science 32 (2005): 855–871	https://doi.org/10.1016/j.jas.2005.01.004
103	Cattle	Bos taurus	Verupgårds Mose	Verupgårds Mose; Sealand	Denmark	bone		4480	70	-21.8	5.1			2.86	Noe-Nygaard et al 2005	Journal of Archaeological Science 32 (2005): 855–871	https://doi.org/10.1016/j.jas.2005.01.004
104	Cattle	Bos taurus	Visborg CQX 3933	Visborg; Jylland	Denmark	bone		4925	55	-22.5	3.9			3.16	Noe-Nygaard et al 2005	Journal of Archaeological Science 32 (2005): 855–871	https://doi.org/10.1016/j.jas.2005.01.004
105	Cattle	Bos taurus	Visborg FHM 3933 JOC	Visborg; Jylland	Denmark	bone		4650	55	-21.3	4.7			2.9	Noe-Nygaard et al 2005	Journal of Archaeological Science 32 (2005): 855–871	https://doi.org/10.1016/j.jas.2005.01.004
106	Cattle	Bos taurus	Øgårde (Okse II)	Øgårde (Okse II); Sealand	Denmark	bone		4675	75	-22.2	4.3			2.91	Noe-Nygaard et al 2005	Journal of Archaeological Science 32 (2005): 855–871	https://doi.org/10.1016/j.jas.2005.01.004
107	Cattle	Bos taurus	KJGCol-37	Havnø	Denmark	bone	ENI			-22.6	4.3			3.16	Gron & Rowley-Conwy 2017	The Holocene 27:1 (2017): 98–109	https://doi.org/10.1177/0959683616652705
108	Cattle	Bos taurus	KJGCol-38	Havnø	Denmark	bone	ENI			-22.6	4.3			3.15	Gron & Rowley-Conwy 2017	The Holocene 27:1 (2017): 98–109	https://doi.org/10.1177/0959683616652705
109	Cattle	Bos taurus	KJGCol-39	Havnø	Denmark	bone	ENI			-22.5	4.7			3.23	Gron & Rowley-Conwy 2017	The Holocene 27:1 (2017): 98–109	https://doi.org/10.1177/0959683616652705
110	Cattle	Bos taurus	285575	Havnø	Denmark	bone	ENI			-22.4	4			3.44	Gron & Rowley-Conwy 2017	The Holocene 27:1 (2017): 98–109	https://doi.org/10.1177/0959683616652705
111	Cattle	Bos taurus	284483	Havnø	Denmark	bone	ENI			-22	3.9			3.27	Gron & Rowley-Conwy 2017	The Holocene 27:1 (2017): 98–109	https://doi.org/10.1177/0959683616652705
112	Cattle	Bos taurus	KJGCol-24	Norsminde	Denmark	bone	ENI			-21.4	4.8			3.21	Gron & Rowley-Conwy 2017	The Holocene 27:1 (2017): 98–109	https://doi.org/10.1177/0959683616652705
113	Cattle	Bos taurus	Bos	Sigtuna	Sweden	bone	Medieval			-22.5	5.2			3.2	Kjellström et al 2009	Journal of Archaeological Science 36 (2009): 2689–2699	https://doi.org/10.1016/j.jas.2009.08.007
114	Cattle	Bos taurus	KOP182	Köpingsvik Öland	Sweden	dentine				-21.3	8.1			3.2	Eriksson et al 2008	Journal of Anthropological Archaeology 27 (2008): 520–543	https://doi.org/10.1016/j.jaa.2008.08.004
115	Cattle	Bos taurus	RES128	Resmo Öland	Sweden	dentine				-21.3	7.3	42.2	15.4	3.2	Eriksson et al 2008	Journal of Anthropological Archaeology 27 (2008): 520–543	https://doi.org/10.1016/j.jaa.2008.08.004
116	Cattle	Bos taurus	RES182	Resmo Öland	Sweden	dentine		2837	39	-21.3	8.1	41	14.8	3.2	Linderholm et al 2014	Internet Archaeology 37 (2014)	https://doi.org/10.11141/ia.37.9
117	Cattle	Bos taurus	TOR29	Torsborg Öland	Sweden	dentine				-21.5	4.9			3	Eriksson et al 2008	Journal of Anthropological Archaeology 27 (2008): 520–543	https://doi.org/10.1016/j.jaa.2008.08.004
118	Cattle	Bos taurus	VÄS148	Västerbjers Gotland	Sweden	dentine	Neolithic Pitted ware			-20.8	5.1			3.2	Eriksson 2003	Eriksson G Doctoral dissertation 2003
119	Cattle	Bos taurus	Karleby 63:47	Karleby Logården	Sweden	dentine	MN A	4314	33	-21.3	5.1			3.2	Sjögren 2017	Journal of Archaeological Science: Reports 12 (2017): 295–306	https://doi.org/10.1016/j.jasrep.2017.01.044
120	Cattle	Bos taurus	Karleby 63:48	Karleby Logården	Sweden	dentine	MN A	4414	40	-20.6	6.9			3.22	Sjögren 2017	Journal of Archaeological Science: Reports 12 (2017): 295–306	https://doi.org/10.1016/j.jasrep.2017.01.044
121	Cattle	Bos taurus	Karleby 63:88	Karleby Logården	Sweden	dentine	MN A	4495	39	-21.6	5.3			3.17	Sjögren 2017	Journal of Archaeological Science: Reports 12 (2017): 295–306	https://doi.org/10.1016/j.jasrep.2017.01.044
122	Cattle	Bos taurus	F194	Björned; Torsåker Ångermanland	Sweden	bone	Late Iron Age			-22.5	4.4			3.1	Linderholm et al 2008b	Fornvännen 103 (2008): 176–189	http://kulturarvsdata.se/raa/fornvannen/2008_176
123	Cattle	Bos taurus	KOP164	Köpingsvik Öland	Sweden	bone		4150	48	-21.9	6.5	39.3	15.4	3	Eriksson et al 2008	Journal of Anthropological Archaeology 27 (2008): 520–543	https://doi.org/10.1016/j.jaa.2008.08.004
124	Cattle	Bos taurus	KOP186	Köpingsvik Öland	Sweden	bone				-21.5	4.4	39.4	14.3	3.2	Eriksson et al 2008	Journal of Anthropological Archaeology 27 (2008): 520–543	https://doi.org/10.1016/j.jaa.2008.08.004
125	Cattle	Bos taurus	RES188	Resmo Öland	Sweden	bone		2015	30	-20.9	8.2	42	15.9	3.1	Eriksson et al 2008	Journal of Anthropological Archaeology 27 (2008): 520–543	https://doi.org/10.1016/j.jaa.2008.08.004
126	Cattle	Bos taurus	VÄS97	Västerbjers Gotland	Sweden	bone	Neolithic Pitted ware			-21	4.6			3.1	Eriksson 2003	Eriksson G Doctoral dissertation 2003
127	Cattle	Bos taurus	VÄS98	Västerbjers Gotland	Sweden	bone	Neolithic Pitted ware			-21.4	4.1			3.2	Eriksson 2003	Eriksson G Doctoral dissertation 2003
128	Cattle	Bos taurus	KJGCol-27	Almhov	Sweden	bone	ENI			-21.8	5.9			3.12	Gron & Rowley-Conwy 2017	The Holocene 27:1 (2017): 98–109	https://doi.org/10.1177/0959683616652705
129	Cattle	Bos taurus	KJGCol-29	Almhov	Sweden	bone	ENI			-22	6.2			3.19	Gron & Rowley-Conwy 2017	The Holocene 27:1 (2017): 98–109	https://doi.org/10.1177/0959683616652705
130	Cattle	Bos taurus	KJGCol-30	Almhov	Sweden	bone	ENI			-21.4	5.2			3.29	Gron & Rowley-Conwy 2017	The Holocene 27:1 (2017): 98–109	https://doi.org/10.1177/0959683616652705
131	Cattle	Bos taurus	KJGCol-42	Almhov	Sweden	bone	ENI			-21.4	5.6			3.14	Gron & Rowley-Conwy 2017	The Holocene 27:1 (2017): 98–109	https://doi.org/10.1177/0959683616652705
132	Cattle	Bos taurus	Karleby 63:49	Karleby Logården	Sweden	bone	MN A	4284	33	-21.7	6.1			3.17	Sjögren 2017	Journal of Archaeological Science: Reports 12 (2017): 295–306	https://doi.org/10.1016/j.jasrep.2017.01.044
133	Cattle	Bos taurus	Karleby 63:50	Karleby Logården	Sweden	bone	MN A	4330	33	-21.6	4.9			3.19	Sjögren 2017	Journal of Archaeological Science: Reports 12 (2017): 295–306	https://doi.org/10.1016/j.jasrep.2017.01.044
134	Cattle	Bos taurus	Karleby 63:51	Karleby Logården	Sweden	bone	MN A	4408	44	-21.7	5.3			3.22	Sjögren 2017	Journal of Archaeological Science: Reports 12 (2017): 295–306	https://doi.org/10.1016/j.jasrep.2017.01.044
135	Cattle	Bos taurus	Karleby 63:52	Karleby Logården	Sweden	bone	MN A	4314	44	-21.5	6			3.2	Sjögren 2017	Journal of Archaeological Science: Reports 12 (2017): 295–306	https://doi.org/10.1016/j.jasrep.2017.01.044
136	Cattle	Bos taurus	Karleby 63:53	Karleby Logården	Sweden	bone	MN A	4352	42	-21.9	5.8			3.2	Sjögren 2017	Journal of Archaeological Science: Reports 12 (2017): 295–306	https://doi.org/10.1016/j.jasrep.2017.01.044
137	Cattle	Bos taurus	Karleby 63:54	Karleby Logården	Sweden	bone	MN A	4357	45	-22.1	5.5			3.19	Sjögren 2017	Journal of Archaeological Science: Reports 12 (2017): 295–306	https://doi.org/10.1016/j.jasrep.2017.01.044
138	Cattle	Bos taurus	Karleby 63:55	Karleby Logården	Sweden	bone	MN A	4360	44	-22.1	5.3			3.19	Sjögren 2017	Journal of Archaeological Science: Reports 12 (2017): 295–306	https://doi.org/10.1016/j.jasrep.2017.01.044
139	Cattle	Bos taurus	Karleby 63:56	Karleby Logården	Sweden	bone	MN A	4334	41	-21.7	5.7			3.19	Sjögren 2017	Journal of Archaeological Science: Reports 12 (2017): 295–306	https://doi.org/10.1016/j.jasrep.2017.01.044
140	Cattle	Bos taurus	DBV 09 Fnr 364	Annexet 2 Visby Gotland	Sweden		Medieval			-21.7	5.7	43	15.7	3.2	Lindkvist 2007 thesis	Lindkvist 2007 Master´s Thesis
141	Cattle	Bos taurus	DBV 10 Fnr 30	S:t Hans 3 Visby Gotland	Sweden		Medieval			-21.2	6.3	37.1	13	3.3	Lindkvist 2007 thesis	Lindkvist 2007 Master´s Thesis
142	Cattle	Bos taurus	DBV 11 Fnr 481	S:t Hans 3 Visby Gotland	Sweden		Medieval			-22.1	7.7	43.9	15.3	3.3	Lindkvist 2007 thesis	Lindkvist 2007 Master´s Thesis
143	Cattle	Bos taurus	DBV 12 Fnr 552	S:t Hans 3 Visby Gotland	Sweden		Medieval			-22.3	6.4	41	14.4	3.3	Lindkvist 2007 thesis	Lindkvist 2007 Master´s Thesis
144	Cattle	Bos taurus	46	Skänninge Östegötland	Sweden		Medieval			-21.9	8	44.9	16.4	3.2	Arcini et al 2012	International Journal of Osteoarchaeology 24 (2012): 543–556	https://doi.org/10.1002/oa.2247
145	Cattle	Bos taurus		Ridanäs Gotland	Sweden		6–12th century AD			-16.1	7.3				Kosiba et al 2007	Journal of Anthropological Archaeology 26 (2007): 394–411	https://doi.org/10.1016/j.jaa.2007.02.001
146	Cattle	Bos taurus	BtNak1	Nakkila	Finland	dentine		3086	30	-21.7	6.8				Bläuer et al 2016	Fennoscandia Archaeologica XXXIV: 171-188	http://www.sarks.fi/fa/PDF/FA33_171.pdf
147	Cattle	Bos taurus	Bt Päl 1	Pälkäne	Finland	dentine		408	30	-21.8	4	39.8991	14.0861	3.30324	Bläuer et al 2016	Fennoscandia Archaeologica XXXIV: 171-188	http://www.sarks.fi/fa/PDF/FA33_171.pdf
148	Cattle	Bos taurus	Bt Lui 2	Eura	Finland	dentine				-21.2	5	30.1376	11.2234	3.1315	Bläuer et al 2016	Fennoscandia Archaeologica XXXIV: 171-188	http://www.sarks.fi/fa/PDF/FA33_171.pdf
149	Cattle	Bos taurus	Bt Häm 1	Hämeenlinna	Finland	dentine		984	24	-21.3	7	40.8299	14.6691	3.24594	Bläuer et al 2016	Fennoscandia Archaeologica XXXIV: 171-188	http://www.sarks.fi/fa/PDF/FA33_171.pdf
150	Cattle	Bos taurus	Bos 1	Eura Luistari	Finland	dentine	600-800 CE			-22.5	4.7	30.5	11.2	3.2	Etu-Sihvola et al 2019	Journal of Archaeological Science: Reports 24 (2019): 1003–1013	https://doi.org/10.1016/j.jasrep.2019.03.005
151	Cattle	Bos taurus	Bt M 1	Raisio	Finland	bone		990	30	-21.1	3.8	40.8521	15.5904	3.05579	Bläuer et al 2016	Fennoscandia Archaeologica XXXIV: 171-188	http://www.sarks.fi/fa/PDF/FA33_171.pdf
152	Cattle	Bos taurus	Bt M 2	Raisio	Finland	bone		984	30	-21.7	4.8	42.6606	15.4079	3.22887	Bläuer et al 2016	Fennoscandia Archaeologica XXXIV: 171-188	http://www.sarks.fi/fa/PDF/FA33_171.pdf
153	Cattle	Bos taurus	Bt M 4	Raisio	Finland	bone		990	30	-21.1	4.4	30.4394	10.6281	3.34001	Bläuer et al 2016	Fennoscandia Archaeologica XXXIV: 171-188	http://www.sarks.fi/fa/PDF/FA33_171.pdf
154	Cattle	Bos taurus	Bt Sys 1	Sysmä	Finland	bone		637	30	-21.8	6.1	41.2529	14.4893	3.32027	Bläuer et al 2016	Fennoscandia Archaeologica XXXIV: 171-188	http://www.sarks.fi/fa/PDF/FA33_171.pdf
155	Cattle	Bos taurus	Bt Mik 1	Mikkeli	Finland	bone		567	30	-21.7	7.2	39.6487	14.1022	3.27876	Bläuer et al 2016	Fennoscandia Archaeologica XXXIV: 171-188	http://www.sarks.fi/fa/PDF/FA33_171.pdf
156	Cattle	Bos taurus	Bt Vet1	Turku	Finland	bone		599	30	-21.7	4	41.8428	15.0719	3.23757	Bläuer et al 2016	Fennoscandia Archaeologica XXXIV: 171-188	http://www.sarks.fi/fa/PDF/FA33_171.pdf
157	Cattle	Bos taurus	Bt Ves 1	Vesilahti	Finland	bone		81	30	-22.4	4.9	38.5626	13.3112	3.37842	Bläuer et al 2016	Fennoscandia Archaeologica XXXIV: 171-188	http://www.sarks.fi/fa/PDF/FA33_171.pdf
158	Cattle	Bos taurus	Bt Pih 1	Pihtipudas	Finland	bone		323	30	-21.6	4.2	41.9138	15.2364	3.20805	Bläuer et al 2016	Fennoscandia Archaeologica XXXIV: 171-188	http://www.sarks.fi/fa/PDF/FA33_171.pdf
159	Cattle	Bos taurus	Bt Naa 1	Naantali	Finland	bone		431	30	-21.8	4.2	41.2383	14.4997	3.31671	Bläuer et al 2016	Fennoscandia Archaeologica XXXIV: 171-188	http://www.sarks.fi/fa/PDF/FA33_171.pdf
160	Cattle	Bos taurus	Bt Uuk 3	Parikkala	Finland	bone		350	30	-22	3.3	42.4106	15.1723	3.25978	Bläuer et al 2016	Fennoscandia Archaeologica XXXIV: 171-188	http://www.sarks.fi/fa/PDF/FA33_171.pdf
161	Cattle	Bos taurus	Bt Uuk 1	Parikkala	Finland	bone		238	30	-21.7	2.9	42.1591	14.6373	3.35889	Bläuer et al 2016	Fennoscandia Archaeologica XXXIV: 171-188	http://www.sarks.fi/fa/PDF/FA33_171.pdf
162	Cattle	Bos taurus	Bt Per 1	Loviisa	Finland	bone		322	30	-22.1	4.6	43.0529	15.3177	3.27773	Bläuer et al 2016	Fennoscandia Archaeologica XXXIV: 171-188	http://www.sarks.fi/fa/PDF/FA33_171.pdf
163	Cattle	Bos taurus	Bt ÅA 6	Turku	Finland	bone		740	30	-22.2	5.2	43.4214	15.6257	3.24063	Bläuer et al 2016	Fennoscandia Archaeologica XXXIV: 171-188	http://www.sarks.fi/fa/PDF/FA33_171.pdf
164	Cattle	Bos taurus	Bt ÅA 5	Turku	Finland	bone		606	30	-22.2	3.2	40.056	14.496	3.22243	Bläuer et al 2016	Fennoscandia Archaeologica XXXIV: 171-188	http://www.sarks.fi/fa/PDF/FA33_171.pdf
165	Cattle	Bos taurus	Bt Kök 1	Kökar	Finland	bone		324	30	-21.6	5.1	42.9834	15.3875	3.25761	Bläuer et al 2016	Fennoscandia Archaeologica XXXIV: 171-188	http://www.sarks.fi/fa/PDF/FA33_171.pdf
166	Cattle	Bos taurus	Bi Nak 2	Nakkila	Finland	bone		187	23	-22.5	5.9	42.9152	14.9034	3.35809	Bläuer et al 2016	Fennoscandia Archaeologica XXXIV: 171-188	http://www.sarks.fi/fa/PDF/FA33_171.pdf
167	Cattle	Bos taurus	OKAJA-1-C	Oulu Kajaaninkatu	Finland	bone	Preindustrial			-23.1	2.8	40.6	14.11	3.4	Lahtinen & Salmi 2018	Environmental Archaeology 24:1 (2018): 1–14	https://doi.org/10.1080/14614103.2018.1444695
168	Cattle	Bos taurus	OPIK-1-C	Oulu Pikisaari	Finland	bone	Preindustrial			-22.3	4.8	43.11	14.9	3.4	Lahtinen & Salmi 2018	Environmental Archaeology 24:1 (2018): 1–14	https://doi.org/10.1080/14614103.2018.1444695
169	Cattle	Bos taurus	Bos 4	Eura Luistari	Finland	bone	After 600-800 CE			-22.7	4.3	29.5	10.5	3.3	Etu-Sihvola et al 2019	Journal of Archaeological Science: Reports 24 (2019): 1003–1013	https://doi.org/10.1016/j.jasrep.2019.03.005
170	Cattle	Bos taurus	Bos AMS1	Eura Luistari	Finland	bone	Late grave?			-21.9	6.2	37.7	13.7	3.2	Etu-Sihvola et al 2019	Journal of Archaeological Science: Reports 24 (2019): 1003–1013	https://doi.org/10.1016/j.jasrep.2019.03.005
171	Cattle	Bos taurus	Bos AMS2	Eura Luistari	Finland	bone	Late grave?			-22.6	4.7	40.1	14.9	3.2	Etu-Sihvola et al 2019	Journal of Archaeological Science: Reports 24 (2019): 1003–1013	https://doi.org/10.1016/j.jasrep.2019.03.005
172	Cattle	Bos taurus	KM 21926:1199	Isokyrö Levänluhta (Leväluhta)	Finland	bone		418	26	-22.6	6.4	40.3	13	3.6	SI: Oinonen et al 2020; AMS: Wessman et al EJA 2018	SI: PloS one (2020): 15(4); e0231787; AMS: European Journal of Archaeology (2018): 21(3), 431–454	SI: https://doi.org/10.1371/journal.pone.0231787; AMS: https://doi.org/doi:10.1017/eaa.2017.84
173	Cattle	Bos taurus	KM 10202:4 or 10438:14	Isokyrö Levänluhta (Leväluhta)	Finland	bone		1748	28	-20.7	6.2	40.2	14.5	3.2	SI: Oinonen et al 2020; AMS: Wessman et al EJA 2018	SI: PloS one (2020): 15(4); e0231787; AMS: European Journal of Archaeology (2018): 21(3), 431–454	SI: https://doi.org/10.1371/journal.pone.0231787; AMS: https://doi.org/doi:10.1017/eaa.2017.84
174	Cattle	Bos taurus	KM 21926:1744	Isokyrö Levänluhta (Leväluhta)	Finland	bone		74	25	-21.9	4.5	42.6	15	3.3	SI: Oinonen et al 2020; AMS: Wessman et al EJA 2018	SI: PloS one (2020): 15(4); e0231787; AMS: European Journal of Archaeology (2018): 21(3), 431–454	SI: https://doi.org/10.1371/journal.pone.0231787; AMS: https://doi.org/doi:10.1017/eaa.2017.84
175	Cattle	Bos taurus	KM 2996:1862	Isokyrö Levänluhta (Leväluhta)	Finland	bone		196	25	-21.6	5.6	40.6	14.6	3.3	SI: Oinonen et al 2020; AMS: Wessman et al EJA 2018	SI: PloS one (2020): 15(4); e0231787; AMS: European Journal of Archaeology (2018): 21(3), 431–454	SI: https://doi.org/10.1371/journal.pone.0231787; AMS: https://doi.org/doi:10.1017/eaa.2017.84
176	Cattle	Bos taurus	KM 6373:1447	Isokyrö Levänluhta (Leväluhta)	Finland	bone				-22.1	4.6	43.5	15.7	3.2	Oinonen et al 2020	PloS one (2020): 15(4); e0231787	https://doi.org/10.1371/journal.pone.0231787
177	Cattle	Bos taurus	816-02	Kałdus	Poland	bone	Medieval			-20.7	7.8	40.4	14.6	3.2	Reitsema et al 2017	Journal of Anthropological Archaeology 45 (2017): 38–52	https://doi.org/10.1016/j.jaa.2016.11.001
178	Cattle	Bos taurus	834-02	Kałdus	Poland	bone	Medieval			-21	7.9	38	13.4	3.3	Reitsema et al 2017	Journal of Anthropological Archaeology 45 (2017): 38–52	https://doi.org/10.1016/j.jaa.2016.11.001
179	Cattle	Bos taurus	839-02	Kałdus	Poland	bone	Medieval			-21.5	7.6	36.7	13.1	3.3	Reitsema et al 2017	Journal of Anthropological Archaeology 45 (2017): 38–52	https://doi.org/10.1016/j.jaa.2016.11.001
180	Cattle	Bos taurus	200	Kałdus	Poland	bone	Medieval			-21	6.4	43.6	15.7	3.2	Reitsema et al 2017	Journal of Anthropological Archaeology 45 (2017): 38–52	https://doi.org/10.1016/j.jaa.2016.11.001
181	Cattle	Bos taurus	810-02	Kałdus	Poland	bone	Medieval			-21.3	6.4	40.2	14.4	3.2	Reitsema et al 2017	Journal of Anthropological Archaeology 45 (2017): 38–52	https://doi.org/10.1016/j.jaa.2016.11.001
182	Cattle	Bos taurus	EA-SI-138	Taksai-2	Kazakhstan	bone	Iron Age			-19.72	7.68	45.69	16.07	3.3	Ananyevskaya et al. 2020	Journal of Archaeological Science: Reports 34 (2020) 102615	https://doi.org/10.1016/j.jasrep.2020.102615
183	Ovicaprid	Ovicaprid	384	Klin-Yar	Russia	Bone				-20.1	6.97			3.2	Higham et al. 2010	Proceedings of the 20th International Radiocarbon Conference, edited by A J T Jull RADIOCARBON, Vol 52, Nr 2–3, 2010, p 653–670	https://doi.org/10.1017/S0033822200045689
184	Ovicaprid	Ovicaprid	387	Klin-Yar	Russia	Bone				-19.8	10.9			3.2	Higham et al. 2010	Proceedings of the 20th International Radiocarbon Conference, edited by A J T Jull RADIOCARBON, Vol 52, Nr 2–3, 2010, p 653–670	https://doi.org/10.1017/S0033822200045689
185	Ovicaprid	Ovicaprid	Ex1S1	Klin-Yar	Russia	Bone				-20.3	6.81			3.2	Higham et al. 2010	Proceedings of the 20th International Radiocarbon Conference, edited by A J T Jull RADIOCARBON, Vol 52, Nr 2–3, 2010, p 653–670	https://doi.org/10.1017/S0033822200045689
186	Ovicaprid	Ovicaprid	Ex1S1	Klin-Yar	Russia	Bone				-19.9	7.66			3.2	Higham et al. 2010	Proceedings of the 20th International Radiocarbon Conference, edited by A J T Jull RADIOCARBON, Vol 52, Nr 2–3, 2010, p 653–670	https://doi.org/10.1017/S0033822200045689
187	Ovicaprid	Ovicaprid	Koban Sq 1 Bldg 2	Klin-Yar	Russia	Bone				-19.7	6.5			3.4	Higham et al. 2010	Proceedings of the 20th International Radiocarbon Conference, edited by A J T Jull RADIOCARBON, Vol 52, Nr 2–3, 2010, p 653–670	https://doi.org/10.1017/S0033822200045689
188	Ovicaprid	Ovicaprid	Koban Sq 1 Bldg 5	Klin-Yar	Russia	Bone				-19.2	4.8			3.3	Higham et al. 2010	Proceedings of the 20th International Radiocarbon Conference, edited by A J T Jull RADIOCARBON, Vol 52, Nr 2–3, 2010, p 653–670	https://doi.org/10.1017/S0033822200045689
189	Ovicaprid	Ovicaprid	Ayg-2/22/9	Aygurskiy	Russia	Bone				-16.4	9.5				Hollund et al. 2010	Journal of Archaeological Science 37:12 (2010) 2971-2983	https://doi.org/10.1016/j.jas.2010.08.009
190	Ovicaprid	Ovicaprid	Ayg-2/22/16	Aygurskiy	Russia	Bone				-18.2	8.8			3.2	Hollund et al. 2010	Journal of Archaeological Science 37:12 (2010) 2971-2983	https://doi.org/10.1016/j.jas.2010.08.009
191	Ovicaprid	Ovicaprid	Ayg-2/22/16	Aygurskiy	Russia	Bone				-15.9	9.5			3.2	Hollund et al. 2010	Journal of Archaeological Science 37:12 (2010) 2971-2983	https://doi.org/10.1016/j.jas.2010.08.009
192	Ovicaprid	Ovicaprid	Ayg-2/22/16	Aygurskiy	Russia	Bone				-15.1	9.5			3.1	Hollund et al. 2010	Journal of Archaeological Science 37:12 (2010) 2971-2983	https://doi.org/10.1016/j.jas.2010.08.009
193	Ovicaprid	Ovicaprid	Ino 1/3/26	Inozyemtsevo	Russia	Bone				-19.3	5.9			3.2	Hollund et al. 2010	Journal of Archaeological Science 37:12 (2010) 2971-2983	https://doi.org/10.1016/j.jas.2010.08.009
194	Ovicaprid	Ovicaprid	VeA2/III/11	Velikent	Russia	Bone				-20.1	7.43			3.17	Hollund et al. 2010	Journal of Archaeological Science 37:12 (2010) 2971-2983	https://doi.org/10.1016/j.jas.2010.08.009
195	Ovicaprid	Ovicaprid	VeA18/II	Velikent	Russia	Bone				-19.72	4.63			3.19	Hollund et al. 2010	Journal of Archaeological Science 37:12 (2010) 2971-2983	https://doi.org/10.1016/j.jas.2010.08.009
196	Ovicaprid	Ovis aries	9/14	Abganerovo	Russia	Bone	1800-1700 BP			-18.5	8.1	41.2	14.9	3.2	Iacumin et al. 2003	Geobios 37 (2004) 37–47	https://doi.org/10.1016/j.geobios.2003.05.001
197	Ovicaprid	Ovis aries	9/15	Abganerovo	Russia	Bone	1800-1700 BP			-19.9	7.2	40	14	3.3	Iacumin et al. 2003	Geobios 37 (2004) 37–47	https://doi.org/10.1016/j.geobios.2003.05.001
198	Ovicaprid	Ovis aries	9/16	Abganerovo	Russia	Bone	1800-1700 BP			-16.6	13.1	40.9	14.7	3.2	Iacumin et al. 2003	Geobios 37 (2004) 37–47	https://doi.org/10.1016/j.geobios.2003.05.001
199	Ovicaprid	Ovis aries	R-9	Abganerovo	Russia	Bone	2150-2050 BP			-18.8	7.7	41.6	14.2	3.4	Iacumin et al. 2003	Geobios 37 (2004) 37–47	https://doi.org/10.1016/j.geobios.2003.05.001
200	Ovicaprid	Ovis aries	R-4	Abganerovo	Russia	Bone	3450-3250 BP			-18.3	9.4	39.4	13.9	3.3	Iacumin et al. 2003	Geobios 37 (2004) 37–47	https://doi.org/10.1016/j.geobios.2003.05.001
201	Ovicaprid	Ovis aries	R-17	Abganerovo	Russia	Bone	3650 BP			-18.3	7.9	40	14.5	3.2	Iacumin et al. 2003	Geobios 37 (2004) 37–47	https://doi.org/10.1016/j.geobios.2003.05.001
202	Ovicaprid	Ovis aries	R-18	Abganerovo	Russia	Bone	3650 BP			-17.8	9.6	41.2	13.3	3.4	Iacumin et al. 2003	Geobios 37 (2004) 37–47	https://doi.org/10.1016/j.geobios.2003.05.001
203	Ovicaprid	Ovis aries	R-13	Abganerovo	Russia	Bone	3750-3650 BP			-20.3	7	40.7	14.7	3.2	Iacumin et al. 2003	Geobios 37 (2004) 37–47	https://doi.org/10.1016/j.geobios.2003.05.001
204	Ovicaprid	Ovis aries	R-7	Abganerovo	Russia	Bone	3750-3650 BP			-16.6	12.1	39.8	13.5	3.4	Iacumin et al. 2003	Geobios 37 (2004) 37–47	https://doi.org/10.1016/j.geobios.2003.05.001
205	Ovicaprid	Ovis aries	2/2	Pokrovka	Russia	Bone	2400-2200 BP			-16.3	11.2	44.1	15.6	3.3	Iacumin et al. 2003	Geobios 37 (2004) 37–47	https://doi.org/10.1016/j.geobios.2003.05.001
206	Ovicaprid	Ovis aries	2/3	Pokrovka	Russia	Bone	2400-2200 BP			-19.4	5.8	43.7	15	3.4	Iacumin et al. 2003	Geobios 37 (2004) 37–47	https://doi.org/10.1016/j.geobios.2003.05.001
207	Ovicaprid	Ovis aries	Ayg-2/22/16	Aygurskiy	Russia	Bone				-17.7	12.1			3.2	Hollund et al. 2010	Journal of Archaeological Science 37:12 (2010) 2971-2983	Investigation of palaeodiet in the North Caucasus (South Russia) Bronze Age
208	Ovicaprid	Ovis aries	Ayg-2/22/16	Aygurskiy	Russia	Bone				-17.4	8.8			3.1	Hollund et al. 2010	Journal of Archaeological Science 37:12 (2010) 2971-2983	Investigation of palaeodiet in the North Caucasus (South Russia) Bronze Age
209	Ovicaprid	Ovis aries	Ayg-2/22/16	Aygurskiy	Russia	Bone				-19	9.9			3.1	Hollund et al. 2010	Journal of Archaeological Science 37:12 (2010) 2971-2983	Investigation of palaeodiet in the North Caucasus (South Russia) Bronze Age
210	Ovicaprid	Ovis aries	Ayg-2/22/16	Aygurskiy	Russia	Bone				-18.6	9.4			3.1	Hollund et al. 2010	Journal of Archaeological Science 37:12 (2010) 2971-2983	Investigation of palaeodiet in the North Caucasus (South Russia) Bronze Age
211	Ovicaprid	Ovis aries	Ayg-2/22/16	Aygurskiy	Russia	Bone				-19.1	7.8			3.1	Hollund et al. 2010	Journal of Archaeological Science 37:12 (2010) 2971-2983	Investigation of palaeodiet in the North Caucasus (South Russia) Bronze Age
212	Ovicaprid	Ovis aries	Ayg-2/22/16	Aygurskiy	Russia	Bone				-16.3	10.4			3.1	Hollund et al. 2010	Journal of Archaeological Science 37:12 (2010) 2971-2983	Investigation of palaeodiet in the North Caucasus (South Russia) Bronze Age
213	Ovicaprid	Ovis aries	Gor 2/3/6	Goryadchevodskiy	Russia	Bone				-20	5.1			3.1	Hollund et al. 2010	Journal of Archaeological Science 37:12 (2010) 2971-2983	Investigation of palaeodiet in the North Caucasus (South Russia) Bronze Age
214	Ovicaprid	Ovis aries	Ino 1/3/8	Inozyemtsevo	Russia	Bone				-19	5.5			3.1	Hollund et al. 2010	Journal of Archaeological Science 37:12 (2010) 2971-2983	Investigation of palaeodiet in the North Caucasus (South Russia) Bronze Age
215	Ovicaprid	Ovicapridae	S00/04	Giecz	Poland	bone	Medieval			-21.9	6.5			3.2	Reitsema et al 2010	Journal of Archaeological Science 37 (2010): 1413–1423	https://doi.org/10.1016/j.jas.2010.01.001
216	Ovicaprid	Ovis	D00/02	Giecz	Poland	bone	Medieval			-21.6	6			3.2	Reitsema et al 2010	Journal of Archaeological Science 37 (2010): 1413–1423	https://doi.org/10.1016/j.jas.2010.01.001
217	Ovicaprid	Ovis	LTL35	Tallinn Tartu St (EKA)	Estonia	dentine	15th to 16th AD layers			-21.4	7.4			3.2	Lightfoot et al 2016	Estonian Journal of Archaeology 20:1 (2016): 8–107	https://doi.org/10.3176/arch.2016.1.04
218	Ovicaprid	Ovis/Capra	LTL34	Tallinn Tartu St (EKA)	Estonia	dentine	15th to 16th AD layers			-20.6	8			3.2	Lightfoot et al 2016	Estonian Journal of Archaeology 20:1 (2016): 8–107	https://doi.org/10.3176/arch.2016.1.04
219	Ovicaprid	Capra hircus/Ovis aries	KIA-54593	Kukruse (cemetery)	Estonia	dentine	Iron Age (Viking Age)	1148	25	-21.1	8.9	40.2	14.9	3.2	Aguraiuja-Lätti et al. 2022	PLoS ONE 17(12): e0279583	https://doi.org/10.1371/journal.pone.0279583
220	Ovicaprid	Capra hircus/Ovis aries	KIA-54584	Asva (settlement)	Estonia	dentine	Iron Age (Pre-Viking Age)	1297	22	-20.8	7	41.4	15.5	3.1	Aguraiuja-Lätti et al. 2022	PLoS ONE 17(12): e0279583	https://doi.org/10.1371/journal.pone.0279583
221	Ovicaprid	Capra hircus/Ovis aries	KIA-54586	Asva (settlement)	Estonia	dentine	Iron Age (Pre-Viking/Viking Age)	1266	23	-20.4	6.1	40.4	15	3.1	Aguraiuja-Lätti et al. 2022	PLoS ONE 17(12): e0279583	https://doi.org/10.1371/journal.pone.0279583
222	Ovicaprid	Capra hircus	GUsi9207	Tallinn, Sauna St 10	Estonia	bone	Medieval			-21.7	2.7	42.9	15.5	3.2	Aguraiuja-Lätti et al. 2022	PLoS ONE 17(12): e0279583	https://doi.org/10.1371/journal.pone.0279583
223	Ovicaprid	Capra hircus	GUsi9794	Tallinn, Sauna St 10	Estonia	bone	Medieval			-21.3	4	43	14.8	3.4	Aguraiuja-Lätti et al. 2022	PLoS ONE 17(12): e0279583	https://doi.org/10.1371/journal.pone.0279583
224	Ovicaprid	Capra hircus	GUsi9796	Tallinn, Vabaduse Sq	Estonia	bone	Medieval			-21.8	5.9	43.9	15.1	3.4	Aguraiuja-Lätti et al. 2022	PLoS ONE 17(12): e0279583	https://doi.org/10.1371/journal.pone.0279583
225	Ovicaprid	Capra hircus	GUsi9798	Tallinn, Vabaduse Sq	Estonia	bone	Medieval			-21.5	5.3	18.4	6.3	3.4	Aguraiuja-Lätti et al. 2022	PLoS ONE 17(12): e0279583	https://doi.org/10.1371/journal.pone.0279583
226	Ovicaprid	Capra hircus	GUsi9221	Tallinn, Jahu St 6	Estonia	bone	Medieval			-21.4	5.8	43	14.6	3.4	Aguraiuja-Lätti et al. 2022	PLoS ONE 17(12): e0279583	https://doi.org/10.1371/journal.pone.0279583
227	Ovicaprid	Capra hircus	KIA-55054	Tallinn, Town Hall Sq	Estonia	bone	Medieval	776	25	-21.3	3.8	40.6	15	3.2	Aguraiuja-Lätti et al. 2022	PLoS ONE 17(12): e0279583	https://doi.org/10.1371/journal.pone.0279583
228	Ovicaprid	Capra hircus	GUsi9807	Lehmja (settlement)	Estonia	bone	Medieval			-21.6	4.8	44.1	15.2	3.4	Aguraiuja-Lätti et al. 2022	PLoS ONE 17(12): e0279583	https://doi.org/10.1371/journal.pone.0279583
229	Ovicaprid	Capra hircus	GUsi10822	Pärnu, Põhja Blvd	Estonia	bone	Medieval			-21.7	4.5	38.6	13.4	3.4	Aguraiuja-Lätti et al. 2022	PLoS ONE 17(12): e0279583	https://doi.org/10.1371/journal.pone.0279583
230	Ovicaprid	Capra hircus	GUsi10814	Rakvere, Pikk St	Estonia	bone	Early Modern			-20.6	5.4	38.1	13.3	3.3	Aguraiuja-Lätti et al. 2022	PLoS ONE 17(12): e0279583	https://doi.org/10.1371/journal.pone.0279583
231	Ovicaprid	Capra hircus	GUsi10225	Tartu, Jakobi St 2	Estonia	bone	Medieval			-21.1	5.2	43.8	15.3	3.3	Aguraiuja-Lätti et al. 2022	PLoS ONE 17(12): e0279583	https://doi.org/10.1371/journal.pone.0279583
232	Ovicaprid	Capra hircus	GUsi10230	Tartu, Lutsu St 12	Estonia	bone	Medieval			-21.6	4.9	43.5	15.1	3.4	Aguraiuja-Lätti et al. 2022	PLoS ONE 17(12): e0279583	https://doi.org/10.1371/journal.pone.0279583
233	Ovicaprid	Capra hircus	KIA-55669	Tartu, University of Tartu Botanical Garden	Estonia	bone	Medieval	758	21	-21.6	6.6	42.1	15.5	3.2	Aguraiuja-Lätti et al. 2022	PLoS ONE 17(12): e0279583	https://doi.org/10.1371/journal.pone.0279583
234	Ovicaprid	Capra hircus	GUsi10237	Viljandi, Pikk St 4	Estonia	bone	Medieval			-22	5.2	29.4	10.6	3.2	Aguraiuja-Lätti et al. 2022	PLoS ONE 17(12): e0279583	https://doi.org/10.1371/journal.pone.0279583
235	Ovicaprid	Capra hircus	GUsi10478	Viljandi Museum yard	Estonia	bone	Medieval			-21.5	4.5	40.2	13.8	3.4	Aguraiuja-Lätti et al. 2022	PLoS ONE 17(12): e0279583	https://doi.org/10.1371/journal.pone.0279583
236	Ovicaprid	Capra hircus	GUsi10487	Viljandi Castle	Estonia	bone	Medieval			-21.2	4.1	41.3	14.2	3.4	Aguraiuja-Lätti et al. 2022	PLoS ONE 17(12): e0279583	https://doi.org/10.1371/journal.pone.0279583
237	Ovicaprid	Capra hircus	GUsi10488	Viljandi Castle	Estonia	bone	Medieval			-21.4	4	40.6	13.8	3.4	Aguraiuja-Lätti et al. 2022	PLoS ONE 17(12): e0279583	https://doi.org/10.1371/journal.pone.0279583
238	Ovicaprid	Capra hircus	GUsi10808	Vastseliina Castle	Estonia	bone	Early Modern			-21.5	7.6	42.3	14.1	3.5	Aguraiuja-Lätti et al. 2022	PLoS ONE 17(12): e0279583	https://doi.org/10.1371/journal.pone.0279583
239	Ovicaprid	Ovis aries	GUsi9206	Tallinn, Sauna St 10	Estonia	bone	Medieval			-21.8	5.8	41.4	15	3.2	Aguraiuja-Lätti et al. 2022	PLoS ONE 17(12): e0279583	https://doi.org/10.1371/journal.pone.0279583
240	Ovicaprid	Ovis aries	GUsi9215	Tallinn, Vabaduse Sq	Estonia	bone	Medieval			-21.7	8.4	40.6	13.8	3.4	Aguraiuja-Lätti et al. 2022	PLoS ONE 17(12): e0279583	https://doi.org/10.1371/journal.pone.0279583
241	Ovicaprid	Ovis aries	GUsi9799	Tallinn, Vabaduse Sq	Estonia	bone	Medieval			-22	6.2	42.2	14.1	3.5	Aguraiuja-Lätti et al. 2022	PLoS ONE 17(12): e0279583	https://doi.org/10.1371/journal.pone.0279583
242	Ovicaprid	Ovis aries	GUsi9232	Tallinn, Jahu St 6	Estonia	bone	Medieval			-21.7	5.8	28.8	10.3	3.2	Aguraiuja-Lätti et al. 2022	PLoS ONE 17(12): e0279583	https://doi.org/10.1371/journal.pone.0279583
243	Ovicaprid	Ovis aries	GUsi9233	Tallinn, Jahu St 6	Estonia	bone	Medieval			-22.4	9	42.8	14.9	3.3	Aguraiuja-Lätti et al. 2022	PLoS ONE 17(12): e0279583	https://doi.org/10.1371/journal.pone.0279583
244	Ovicaprid	Ovis aries	GUsi9234	Tallinn, Jahu St 6	Estonia	bone	Medieval			-22.5	9.3	44.1	15	3.4	Aguraiuja-Lätti et al. 2022	PLoS ONE 17(12): e0279583	https://doi.org/10.1371/journal.pone.0279583
245	Ovicaprid	Ovis aries	GUsi9802	Tallinn, Härjapea	Estonia	bone	Medieval			-21.4	7	44.7	15.6	3.3	Aguraiuja-Lätti et al. 2022	PLoS ONE 17(12): e0279583	https://doi.org/10.1371/journal.pone.0279583
246	Ovicaprid	Ovis aries	GUsi9806	Lehmja (settlement)	Estonia	bone	Medieval			-21.9	7.9	45.3	15.7	3.4	Aguraiuja-Lätti et al. 2022	PLoS ONE 17(12): e0279583	https://doi.org/10.1371/journal.pone.0279583
247	Ovicaprid	Ovis aries	GUsi9810	Rebala (settlement)	Estonia	bone	Medieval			-21.2	6.9	42.5	15	3.3	Aguraiuja-Lätti et al. 2022	PLoS ONE 17(12): e0279583	https://doi.org/10.1371/journal.pone.0279583
248	Ovicaprid	Ovis aries	GUsi9811	Rebala (settlement)	Estonia	bone	Medieval			-22	6.1	41.3	14.5	3.3	Aguraiuja-Lätti et al. 2022	PLoS ONE 17(12): e0279583	https://doi.org/10.1371/journal.pone.0279583
249	Ovicaprid	Ovis aries	KIA-55256	Pada (settlement)	Estonia	bone	Iron Age (Viking Age)	1177	18	-20.9	5.7	40.4	N/A	N/A	Aguraiuja-Lätti et al. 2022	PLoS ONE 17(12): e0279583	https://doi.org/10.1371/journal.pone.0279583
250	Ovicaprid	Ovis aries	GUsi9818/Poz-135545	Valjala hill fort	Estonia	bone	Iron Age (Late Iron Age)	835	30	-21.5	6.2	43.1	14.5	3.5	Aguraiuja-Lätti et al. 2022	PLoS ONE 17(12): e0279583	https://doi.org/10.1371/journal.pone.0279583
251	Ovicaprid	Ovis aries	GUsi10830/Poz-135546	Pöide hill fort	Estonia	bone	Iron Age (Late Iron Age)	960	35	-21.1	4.6	42.3	14.3	3.5	Aguraiuja-Lätti et al. 2022	PLoS ONE 17(12): e0279583	https://doi.org/10.1371/journal.pone.0279583
252	Ovicaprid	Ovis aries	GUsi10834/Poz-135552	Pöide hill fort	Estonia	bone	Iron Age (Late Iron Age)	875	30	-21.4	6.4	42.7	14.5	3.4	Aguraiuja-Lätti et al. 2022	PLoS ONE 17(12): e0279583	https://doi.org/10.1371/journal.pone.0279583
253	Ovicaprid	Ovis aries	KIA-55670	Haapsalu, Jaani St 4	Estonia	bone	Medieval	673	21	-21.6	6.5	42.3	15.8	3.1	Aguraiuja-Lätti et al. 2022	PLoS ONE 17(12): e0279583	https://doi.org/10.1371/journal.pone.0279583
254	Ovicaprid	Ovis aries	GUsi10823	Pärnu, Põhja Blvd	Estonia	bone	Medieval			-22	6.3	39.7	13.5	3.4	Aguraiuja-Lätti et al. 2022	PLoS ONE 17(12): e0279583	https://doi.org/10.1371/journal.pone.0279583
255	Ovicaprid	Ovis aries	GUsi10824	Pärnu, Põhja Blvd	Estonia	bone	Early Modern			-22	8.6	39	13.4	3.4	Aguraiuja-Lätti et al. 2022	PLoS ONE 17(12): e0279583	https://doi.org/10.1371/journal.pone.0279583
256	Ovicaprid	Ovis aries	GUsi10825	Pärnu, Põhja Blvd	Estonia	bone	Early Modern			-21.5	5.4	42.1	14.4	3.4	Aguraiuja-Lätti et al. 2022	PLoS ONE 17(12): e0279583	https://doi.org/10.1371/journal.pone.0279583
257	Ovicaprid	Ovis aries	KIA-55051	Soontagana hill fort	Estonia	bone	Iron Age (Late Iron Age)	910	30	-21.4	5.3	39.9	14.9	3.1	Aguraiuja-Lätti et al. 2022	PLoS ONE 17(12): e0279583	https://doi.org/10.1371/journal.pone.0279583
258	Ovicaprid	Ovis aries	GUsi10840	Sargvere (settlement)	Estonia	bone	Medieval			-21.8	6.9	41.6	14.4	3.4	Aguraiuja-Lätti et al. 2022	PLoS ONE 17(12): e0279583	https://doi.org/10.1371/journal.pone.0279583
259	Ovicaprid	Ovis aries	GUsi10841	Sargvere (settlement)	Estonia	bone	Medieval			-21.6	5.8	40.9	13.8	3.4	Aguraiuja-Lätti et al. 2022	PLoS ONE 17(12): e0279583	https://doi.org/10.1371/journal.pone.0279583
260	Ovicaprid	Ovis aries	GUsi9822	Otepää hill fort	Estonia	bone	Iron Age (Pre-Viking/Viking/Late Iron Age)			-22	6.9	41.4	14.5	3.3	Aguraiuja-Lätti et al. 2022	PLoS ONE 17(12): e0279583	https://doi.org/10.1371/journal.pone.0279583
261	Ovicaprid	Ovis aries	GUsi10224	Tartu, Jakobi St 2	Estonia	bone	Medieval			-21.3	4.7	41.9	14.4	3.4	Aguraiuja-Lätti et al. 2022	PLoS ONE 17(12): e0279583	https://doi.org/10.1371/journal.pone.0279583
262	Ovicaprid	Ovis aries	GUsi10229	Tartu, Lutsu St 12	Estonia	bone	Medieval			-22.1	5.6	41.6	14.3	3.4	Aguraiuja-Lätti et al. 2022	PLoS ONE 17(12): e0279583	https://doi.org/10.1371/journal.pone.0279583
263	Ovicaprid	Ovis aries	KIA-55672	Tartu, Ülikooli St 15	Estonia	bone	Medieval	544	22	-21.4	5.2	41.5	15.5	3.1	Aguraiuja-Lätti et al. 2022	PLoS ONE 17(12): e0279583	https://doi.org/10.1371/journal.pone.0279583
264	Ovicaprid	Ovis aries	GUsi10236	Viljandi, Pikk St 4	Estonia	bone	Medieval			-21.5	5.7	44.2	15.4	3.3	Aguraiuja-Lätti et al. 2022	PLoS ONE 17(12): e0279583	https://doi.org/10.1371/journal.pone.0279583
265	Ovicaprid	Ovis aries	GUsi10477	Viljandi Museum yard	Estonia	bone	Medieval			-21.5	5.3	41.7	14.2	3.4	Aguraiuja-Lätti et al. 2022	PLoS ONE 17(12): e0279583	https://doi.org/10.1371/journal.pone.0279583
266	Ovicaprid	Ovis aries	GUsi10485	Viljandi Castle	Estonia	bone	Medieval			-22.1	4.3	42.1	14	3.5	Aguraiuja-Lätti et al. 2022	PLoS ONE 17(12): e0279583	https://doi.org/10.1371/journal.pone.0279583
267	Ovicaprid	Ovis aries	GUsi10486	Viljandi Castle	Estonia	bone	Medieval			-21.9	7.6	41.6	14.4	3.4	Aguraiuja-Lätti et al. 2022	PLoS ONE 17(12): e0279583	https://doi.org/10.1371/journal.pone.0279583
268	Ovicaprid	Ovis aries	GUsi10810	Vastseliina Castle	Estonia	bone	Early Modern			-22	6.5	42	13.9	3.5	Aguraiuja-Lätti et al. 2022	PLoS ONE 17(12): e0279583	https://doi.org/10.1371/journal.pone.0279583
269	Ovicaprid	Capra hircus/Ovis aries	KIA-55253	Rebala (stone-cist graves)	Estonia	bone	Iron Age (Roman Iron Age)	1802	19	-21.5	7	36.7	13.4	3.2	Aguraiuja-Lätti et al. 2022	PLoS ONE 17(12): e0279583	https://doi.org/10.1371/journal.pone.0279583
270	Ovicaprid	Capra hircus/Ovis aries	KIA-55653	Jõelähtme Teemeistri (stone-cist graves)	Estonia	bone	Iron Age (Roman Iron Age)	1800	23	-22.1	7.6	40.2	14.6	3.2	Aguraiuja-Lätti et al. 2022	PLoS ONE 17(12): e0279583	https://doi.org/10.1371/journal.pone.0279583
271	Ovicaprid	Capra hircus/Ovis aries	KIA-55265	Viira (cemetery)	Estonia	bone	Early Modern	316	26	-20.9	8.5	40.5	15	3.2	Aguraiuja-Lätti et al. 2022	PLoS ONE 17(12): e0279583	https://doi.org/10.1371/journal.pone.0279583
272	Ovicaprid	Capra hircus/Ovis aries	KIA-54592	Rakvere, Pikk St	Estonia	bone	Medieval	405	23	-21	5.7	42.2	15.7	3.2	Aguraiuja-Lätti et al. 2022	PLoS ONE 17(12): e0279583	https://doi.org/10.1371/journal.pone.0279583
273	Ovicaprid	Capra hircus/Ovis aries	KIA-55269	Jõuga (cemetery)	Estonia	bone	Iron Age (Viking Age)	1063	20	-21.5	5.8	39	14.3	3.2	Aguraiuja-Lätti et al. 2022	PLoS ONE 17(12): e0279583	https://doi.org/10.1371/journal.pone.0279583
274	Ovicaprid	Capra hircus/Ovis aries	KIA-55658	Otepää hill fort	Estonia	bone	Iron Age (Pre-Viking/Viking Age)	1268	22	-21.8	5.8	41.1	15.3	3.1	Aguraiuja-Lätti et al. 2022	PLoS ONE 17(12): e0279583	https://doi.org/10.1371/journal.pone.0279583
275	Ovicaprid	Ovis aries	ŽPVR 33	The lower castle of Vilnius and The Palace of the Grand Dukes of Lithuania; Vilnius	Lithuania	bone	16–17th C AD			-22.2	9.9	37.9	13.8	3.2	Simčenka et al 2020	Archaeological and Anthropological Sciences 12 (2020): 1–14	https://doi.org/10.1007/s12520-020-01063-9
276	Ovicaprid	Ovis	Sj 3	Birka	Sweden	bone				-22.1	6.3			3.4	Linderholm et al 2008a	Antiquity 82 (2008): 446–461	doi:10.1017/S0003598X00096939
277	Ovicaprid	Ovis aries	SMÖ 004	Smörkullen; Västra Tollstad; Alvastra Östergotland	Sweden	bone	Roman Iron Age 375-400 AD			-20.8	9.4			3.2	Lindberg 2009	Lindberg T Masters thesis 2009
278	Ovicaprid	Ovis aries	VÄS90	Västerbjers Gotland	Sweden	bone	Neolithic Pitted ware			-21	5.8			3.3	Eriksson 2003	Eriksson G Doctoral dissertation 2003
279	Ovicaprid	Ovis aries		Ridanäs Gotland	Sweden		6–12th century AD			-16.6	6.3				Kosiba et al 2007	Journal of Anthropological Archaeology 26 (2007): 394–411	https://doi.org/10.1016/j.jaa.2007.02.001
280	Ovicaprid	Ovis aries/Capra hircus	RES127	Resmo Öland	Sweden	bone		270	20	-21.3	9.1	40.7	15.2	3.1	Eriksson et al 2008	Journal of Anthropological Archaeology 27 (2008): 520–543	https://doi.org/10.1016/j.jaa.2008.08.004
281	Ovicaprid	Ovis aries/Capra hircus	RES144	Resmo Öland	Sweden	bone		3735	35	-19.8	6.5	39.7	14.1	3.3	Eriksson et al 2008	Journal of Anthropological Archaeology 27 (2008): 520–543	https://doi.org/10.1016/j.jaa.2008.08.004
282	Ovicaprid	Ovis aries/Capra hircus	RES157	Resmo Öland	Sweden	bone				-20.9	6.6			3.1	Eriksson et al 2008	Journal of Anthropological Archaeology 27 (2008): 520–543	https://doi.org/10.1016/j.jaa.2008.08.004
283	Ovicaprid	Ovis aries/Capra hircus	RES158	Resmo Öland	Sweden	bone				-20.1	6.2	42.4	16.1	3.1	Eriksson et al 2008	Journal of Anthropological Archaeology 27 (2008): 520–543	https://doi.org/10.1016/j.jaa.2008.08.004
284	Ovicaprid	Ovis aries/Capra hircus	RES159	Resmo Öland	Sweden	bone				-21.5	7.4			2.9	Eriksson et al 2008	Journal of Anthropological Archaeology 27 (2008): 520–543	https://doi.org/10.1016/j.jaa.2008.08.004
285	Ovicaprid	Ovis aries/Capra hircus	TOR34	Torsborg Öland	Sweden	bone		3865	40	-22.5	5.6	38.8	15.5	2.9	Eriksson et al 2008	Journal of Anthropological Archaeology 27 (2008): 520–543	https://doi.org/10.1016/j.jaa.2008.08.004
286	Ovicaprid	Ovis aries/Capra hircus	USA 9	Unna Saiva	Sweden	bone		664	37	-21.9	5.4	42.8	14.9	3.4	Salmi et al 2015	Journal of Anthropological Archaeology 40 (2015): 10–22	https://doi.org/10.1016/j.jaa.2015.05.003
287	Ovicaprid	Ovis aries/Capra hircus	VÄS85	Västerbjers Gotland	Sweden	bone	Neolithic Pitted ware			-20.3	4.5			3.2	Eriksson 2003	Eriksson G Doctoral dissertation 2003
288	Ovicaprid	Ovis sp.	DBV 08 Fnr 53	S:t Hans 3 Visby Gotland	Sweden		Medieval			-20.9	7	43.6	14.9	3.4	Lindkvist 2007 thesis	Lindkvist 2007 Master´s Thesis
289	Ovicaprid	Ovis/Capra	A49	Björned; Torsåker Ångermanland	Sweden	bone	Late Iron Age			-21.3	3.3			3.2	Linderholm et al 2008b	Fornvännen 103 (2008): 176–189	http://kulturarvsdata.se/raa/fornvannen/2008_176
290	Ovicaprid	Ovis/Capra	F154	Björned; Torsåker Ångermanland	Sweden	bone	Late Iron Age			-21.6	7.8			3.2	Linderholm et al 2008b	Fornvännen 103 (2008): 176–189	http://kulturarvsdata.se/raa/fornvannen/2008_176
291	Ovicaprid	Ovis/Capra	SMÖ 007	Smörkullen; Västra Tollstad; Alvastra Östergotland	Sweden	bone	Roman Iron Age 375-400 AD			-20.8	9.4			3.2	Lindberg 2009	Lindberg T Masters thesis 2009
292	Ovicaprid	Ovis/Capra		Björnedsgravfälted och Pukeborg	Sweden					-21.6	7.8			3.2	Andersson 2006	Andersson K Masters thesis 2006
293	Ovicaprid	Ovis/Capra		Björnedsgravfälted och Pukeborg	Sweden					-21.3	3.3			3.2	Andersson 2006	Andersson K Masters thesis 2006
294	Ovicaprid	Ovis/Capra	Karleby 63:70	Karleby Logården	Sweden	bone	MN A	4501	36	-23.8	4.6			3.21	Sjögren 2017	Journal of Archaeological Science: Reports 12 (2017): 295–306	https://doi.org/10.1016/j.jasrep.2017.01.044
295	Ovicaprid	Ovis/Capra	Karleby 63:79	Karleby Logården	Sweden	bone	MN A	4536	50	-21.6	6.7			3.2	Sjögren 2017	Journal of Archaeological Science: Reports 12 (2017): 295–306	https://doi.org/10.1016/j.jasrep.2017.01.044
296	Ovicaprid	Ovis/Capra	Karleby 63:80	Karleby Logården	Sweden	bone	MN A	4397	40	-21.2	6.7			3.23	Sjögren 2017	Journal of Archaeological Science: Reports 12 (2017): 295–306	https://doi.org/10.1016/j.jasrep.2017.01.044
297	Ovicaprid	Ovis/Capra	Karleby 63:81	Karleby Logården	Sweden	bone	MN A	4324	43	-21.3	6.6			3.23	Sjögren 2017	Journal of Archaeological Science: Reports 12 (2017): 295–306	https://doi.org/10.1016/j.jasrep.2017.01.044
298	Ovicaprid	Ovis/Capra	ALM72	Alvastra dolmen	Sweden	bone				-21.4	5.8	43.3	15.2	3.3	Fornander 2011	Current Swedish Archaeology 19 (2011): 113–141	https://doi.org/10.37718/CSA.2011.09
299	Ovicaprid	Ovis/Capra	ALM68	Alvastra dolmen	Sweden	bone				-23.1	7.2	43.2	16.3	3.1	Fornander 2011	Current Swedish Archaeology 19 (2011): 113–141	https://doi.org/10.37718/CSA.2011.09
300	Ovicaprid	Ovis/Capra	ALM69	Alvastra dolmen	Sweden	bone				-19.8	9.9	41.6	14.8	3.3	Fornander 2011	Current Swedish Archaeology 19 (2011): 113–141	https://doi.org/10.37718/CSA.2011.09
301	Ovicaprid	Capra/Ovis	KJGCol-18	Almhov	Sweden	bone	ENI			-21.5	5.5			3.19	Gron & Rowley-Conwy 2017	The Holocene 27:1 (2017): 98–109	https://doi.org/10.1177/0959683616652705
302	Ovicaprid	Capra/Ovis	KJGCol-21	Almhov	Sweden	bone	ENI			-22.7	6.2			3.33	Gron & Rowley-Conwy 2017	The Holocene 27:1 (2017): 98–109	https://doi.org/10.1177/0959683616652705
303	Ovicaprid	Capra/Ovis	KJGCol-23	Almhov	Sweden	bone	ENI			-21.8	7.6			3.3	Gron & Rowley-Conwy 2017	The Holocene 27:1 (2017): 98–109	https://doi.org/10.1177/0959683616652705
304	Ovicaprid	Ovis/Capra	ALM71	Alvastra dolmen	Sweden	dentine		1269	30	-21.5	10.3	45.2	16.1	3.3	Fornander 2011	Current Swedish Archaeology 19 (2011): 113–141	https://doi.org/10.37718/CSA.2011.09
305	Ovicaprid	Ovis aries/Capra hircus	KOP104	Köpingsvik Öland	Sweden	dentine				-21	7.6			3.3	Eriksson et al 2008	Journal of Anthropological Archaeology 27 (2008): 520–543	https://doi.org/10.1016/j.jaa.2008.08.004
306	Ovicaprid	Ovis aries/Capra hircus	KOP183	Köpingsvik Öland	Sweden	dentine				-21	6.7	40.3	15.1	3.1	Eriksson et al 2008	Journal of Anthropological Archaeology 27 (2008): 520–543	https://doi.org/10.1016/j.jaa.2008.08.004
307	Ovicaprid	Ovis aries/Capra hircus	KOP185	Köpingsvik Öland	Sweden	dentine				-20.5	6.1			3.2	Eriksson et al 2008	Journal of Anthropological Archaeology 27 (2008): 520–543	https://doi.org/10.1016/j.jaa.2008.08.004
308	Ovicaprid	Ovis aries/Capra hircus	VÄS84	Västerbjers Gotland	Sweden	dentine	Neolithic Pitted ware			-20.2	8.3			3.3	Eriksson 2003	Eriksson G Doctoral dissertation 2003
309	Ovicaprid	Ovis aries/Capra hircus	VÄS89	Västerbjers Gotland	Sweden	dentine	Neolithic Pitted ware			-20.3	5			3.2	Eriksson 2003	Eriksson G Doctoral dissertation 2003
310	Ovicaprid	Ovis/Capra	ALM70	Alvastra dolmen	Sweden	dentine				-20.9	10.2	44.2	15.9	3.2	Fornander 2011	Current Swedish Archaeology 19 (2011): 113–141	https://doi.org/10.37718/CSA.2011.09
311	Ovicaprid	Ovis/Capra	ALM73	Alvastra dolmen	Sweden	dentine		1247	30	-21.3	7.5	45.1	15.9	3.3	Fornander 2011	Current Swedish Archaeology 19 (2011): 113–141	https://doi.org/10.37718/CSA.2011.09
312	Ovicaprid	Ovis/Capra	ALM74	Alvastra dolmen	Sweden	dentine		991	30	-21.5	7.5	44.1	16.4	3.1	Fornander 2011	Current Swedish Archaeology 19 (2011): 113–141	https://doi.org/10.37718/CSA.2011.09
313	Ovicaprid	Ovis	Oa Pih 1	Pihtipudas	Finland	bone		342	30	-21.6	3.1	39.2632	13.3741	3.42362	Bläuer et al 2016	Fennoscandia Archaeologica XXXIV: 171-188	http://www.sarks.fi/fa/PDF/FA33_171.pdf
314	Ovicaprid	Ovis	Oa Uuk 2	Parikkala	Finland	bone		410	30	-21.9	5.1	40.761	14.4777	3.28331	Bläuer et al 2016	Fennoscandia Archaeologica XXXIV: 171-188	http://www.sarks.fi/fa/PDF/FA33_171.pdf
315	Ovicaprid	Ovis	Oa Pas 1	Pasvik	Finland	bone		984	31	-20.3	8.6	40.8746	13.9452	3.41818	Bläuer et al 2016	Fennoscandia Archaeologica XXXIV: 171-188	http://www.sarks.fi/fa/PDF/FA33_171.pdf
316	Ovicaprid	Ovis	Oa M 1	Raisio	Finland	bone		965	30	-21.4	4.6	40.2471	15.7745	2.97539	Bläuer et al 2016	Fennoscandia Archaeologica XXXIV: 171-188	http://www.sarks.fi/fa/PDF/FA33_171.pdf
317	Ovicaprid	Ovis	OaM 2	Raisio	Finland	bone		1040	31	-21.2	4.1	41.1029	14.268	3.35951	Bläuer et al 2016	Fennoscandia Archaeologica XXXIV: 171-188	http://www.sarks.fi/fa/PDF/FA33_171.pdf
318	Ovicaprid	Ovis	OaM 4	Raisio	Finland	bone		995	30	-21.3	5	39.3968	14.475	3.174	Bläuer et al 2016	Fennoscandia Archaeologica XXXIV: 171-188	http://www.sarks.fi/fa/PDF/FA33_171.pdf
319	Ovicaprid	Ovis	Oa Naa-1	Naantali	Finland	bone		452	30	-21.6	6.6	41.4422	14.3614	3.36522	Bläuer et al 2016	Fennoscandia Archaeologica XXXIV: 171-188	http://www.sarks.fi/fa/PDF/FA33_171.pdf
320	Ovicaprid	Ovis	Oa ÅA-3	Turku	Finland	bone		506	32	-21.6	6.8	41.3186	14.7002	3.27784	Bläuer et al 2016	Fennoscandia Archaeologica XXXIV: 171-188	http://www.sarks.fi/fa/PDF/FA33_171.pdf
321	Ovicaprid	Ovis	Oa ÅA-4	Turku	Finland	bone		581	31	-21.7	5.5	41.2972	14.6552	3.28621	Bläuer et al 2016	Fennoscandia Archaeologica XXXIV: 171-188	http://www.sarks.fi/fa/PDF/FA33_171.pdf
322	Ovicaprid	Ovis	Oa ÅA-5	Turku	Finland	bone		722	32	-21.9	7	42.2412	14.9167	3.3024	Bläuer et al 2016	Fennoscandia Archaeologica XXXIV: 171-188	http://www.sarks.fi/fa/PDF/FA33_171.pdf
323	Ovicaprid	Ovis	Oa ÅA-6	Turku	Finland	bone		737	32	-21.7	5.7	41.9303	14.8077	3.30222	Bläuer et al 2016	Fennoscandia Archaeologica XXXIV: 171-188	http://www.sarks.fi/fa/PDF/FA33_171.pdf
324	Ovicaprid	Ovis	OaVet2	Turku	Finland	bone		487	30	-21.8	7	42.2165	14.7365	3.34084	Bläuer et al 2016	Fennoscandia Archaeologica XXXIV: 171-188	http://www.sarks.fi/fa/PDF/FA33_171.pdf
325	Ovicaprid	Ovis	OaPer1	Loviisa	Finland	bone		473	30	-21.4	5.8	34.7637	12.7382	3.1826	Bläuer et al 2016	Fennoscandia Archaeologica XXXIV: 171-188	http://www.sarks.fi/fa/PDF/FA33_171.pdf
326	Ovicaprid	Ovis	OaKök1	Kökar	Finland	bone		489	30	-22.1	7.3	41.4734	15.0124	3.22169	Bläuer et al 2016	Fennoscandia Archaeologica XXXIV: 171-188	http://www.sarks.fi/fa/PDF/FA33_171.pdf
327	Ovicaprid	Ovis	OaKök2	Kökar	Finland	bone		305	30	-20.8	5.2	40.0759	14.8389	3.14954	Bläuer et al 2016	Fennoscandia Archaeologica XXXIV: 171-188	http://www.sarks.fi/fa/PDF/FA33_171.pdf
328	Ovicaprid	Ovis aries	KM 10202:4 or KM 10438:14	Isokyrö Levänluhta (Leväluhta)	Finland	bone		1649	27	-21.6	7.2	40.7	13.8	3.4	SI: Oinonen et al 2020; AMS: Wessman et al EJA 2018	SI: PloS one (2020): 15(4); e0231787; AMS: European Journal of Archaeology (2018): 21(3), 431–454	SI: https://doi.org/10.1371/journal.pone.0231787; AMS: https://doi.org/doi:10.1017/eaa.2017.84
329	Ovicaprid	Ovis aries	KM 21926:612	Isokyrö Levänluhta (Leväluhta)	Finland	bone		136	25	-21.9	6	40.5	14.4	3.3	SI: Oinonen et al 2020; AMS: Wessman et al EJA 2018	SI: PloS one (2020): 15(4); e0231787; AMS: European Journal of Archaeology (2018): 21(3), 431–454	SI: https://doi.org/10.1371/journal.pone.0231787; AMS: https://doi.org/doi:10.1017/eaa.2017.84
330	Ovicaprid	Ovis aries/Capra hircus	OKAJA-2-S	Oulu Kajaaninkatu	Finland	bone	Preindustrial			-22	5	44.01	15.55	3.3	Lahtinen & Salmi 2018	Environmental Archaeology 24:1 (2018): 1–14	https://doi.org/10.1080/14614103.2018.1444695
331	Ovicaprid	Ovis aries/Capra hircus	OPIK-2-S	Oulu Pikisaari	Finland	bone	Preindustrial			-21.7	7.4	42.89	14.83	3.4	Lahtinen & Salmi 2018	Environmental Archaeology 24:1 (2018): 1–14	https://doi.org/10.1080/14614103.2018.1444695
332	Ovicaprid	Ovis aries/Capra hircus	Ovis 4	Eura Luistari	Finland	bone	800-1050 CE			-21.6	3.2	32.8	11.5	3.3	Etu-Sihvola et al 2019	Journal of Archaeological Science: Reports 24 (2019): 1003–1013	https://doi.org/10.1016/j.jasrep.2019.03.005
333	Ovicaprid	Ovis/Capra	OaVet1	Turku	Finland	bone		550	30	-21.2	7.5	38.9582	13.6958	3.31724	Bläuer et al 2016	Fennoscandia Archaeologica XXXIV: 171-188	http://www.sarks.fi/fa/PDF/FA33_171.pdf
334	Ovicaprid	Ovis/Caprid	Aboa Vetus Ars Nova M005 sample 3	Turku Aboa vetus Ars Nova	Finland	bone	Medieval			-22.1	7.2	42.4	14.97	2.9	I. Aalto; unpublished data	unpublished
335	Ovicaprid	Ovis/Capra	Oa Mik-1	Mikkeli	Finland	dentine		865	33	-21.7	7.6	41.8013	14.8183	3.28971	Bläuer et al 2016	Fennoscandia Archaeologica XXXIV: 171-188	http://www.sarks.fi/fa/PDF/FA33_171.pdf
336	Ovicaprid	Ovis		Flakstad; Lofoten archipelago	Norway	bone	Viking Age			-22.3	3.6	37.9	14	3.1	Naumann et al 2014a	Journal of Archaeological Science 41 (2014): 533–540	https://doi.org/10.1016/j.jas.2013.08.022
337	Ovicaprid	Ovis/Capra		Flakstad; Lofoten archipelago	Norway	bone	Viking Age			-21.6	3.7	39.1	14.6	3.1	Naumann et al 2014a	Journal of Archaeological Science 41 (2014): 533–540	https://doi.org/10.1016/j.jas.2013.08.022
338	Ovicaprid	Ovis/Capra	BEA-3	Karasjok Beajalgŋai	Norway	bone		600	37	-18.6	11.3	31.7	10.2	3.6	SI: Spangen & Fjellström 2019; AMS: Spangen 2016	SI: Fennoscandia Archaeologica XXXV (2019): 3–17; AMS: Spangen M Doctoral dissertation 2016	SI: http://www.sarks.fi/fa/PDF/FA35_3.pdf; AMS: https://www.diva-portal.org/smash/get/diva2:956539/FULLTEXT01.pdf
339	Ovicaprid	Ovis aries	BOFÅR1	Bofa/Tornegård	Denmark	bone				-21.9	7.2	43.1	15.2	3.3	Jørkov et al 2010	American Journal of Biological Anthropology 143:4 (2010): 523–533	https://doi.org/10.1002/ajpa.21346
340	Ovicaprid	Ovis aries	BOFÅR2	Bofa/Tornegård	Denmark	bone				-21.7	6.3	36.7	12.1	3.5	Jørkov et al 2010	American Journal of Biological Anthropology 143:4 (2010): 523–533	https://doi.org/10.1002/ajpa.21346
341	Ovicaprid	Ovis aries	HAFÅR	Hågerup	Denmark					-21.6	6.7	43.8	16.2	3.2	Jørkov et al 2010	American Journal of Biological Anthropology 143:4 (2010): 523–533	https://doi.org/10.1002/ajpa.21346
342	Ovicaprid	Ovis aries	HIFÅR	Himlingøje	Denmark	bone				-21.9	7.7	43.1	15.2	3.3	Jørkov et al 2010	American Journal of Biological Anthropology 143:4 (2010): 523–533	https://doi.org/10.1002/ajpa.21346
343	Ovicaprid	Ovis aries	KAFÅR2	Kassebjerggård	Denmark					-22	6.2	41.7	14	3.5	Jørkov et al 2010	American Journal of Biological Anthropology 143:4 (2010): 523–533	https://doi.org/10.1002/ajpa.21346
344	Ovicaprid	Ovis aries	SKFÅR	Skovgårde	Denmark	bone				-22	7	43.9	16.1	3.2	Jørkov et al 2010	American Journal of Biological Anthropology 143:4 (2010): 523–533	https://doi.org/10.1002/ajpa.21346
345	Ovicaprid	Ovis/Capra	2911YN	Bjørnsholm	Denmark	bone				-23.4	4.6			3.26	Craig et al 2006	Journal of Archaeological Science 33 (2006): 1642–1646	https://doi.org/10.1016/j.jas.2006.05.006
346	Ovicaprid	Capra hircus	AAR-7061	Storelyng VI	Denmark	bone		4500	45	-21.6	4.5			3.2	Fischer et al 2007	Journal of Archaeological Science 34 (2007): 2125–2150	https://doi.org/10.1016/j.jas.2007.02.028
347	Ovicaprid	Capra hircus	AAR-7062	Storelyng VI	Denmark	bone		4420	50	-21.1	5.1			3.2	Fischer et al 2007	Journal of Archaeological Science 34 (2007): 2125–2150	https://doi.org/10.1016/j.jas.2007.02.028
348	Ovicaprid	Capra/Ovis	KJGCol-19	Havnø	Denmark	bone	ENI			-23.1	5			3.31	Gron & Rowley-Conwy 2017	The Holocene 27:1 (2017): 98–109	https://doi.org/10.1177/0959683616652705
349	Ovicaprid	Capra/Ovis	KJGCol-20	Havnø	Denmark	bone	ENI			-21.7	4.5			3.19	Gron & Rowley-Conwy 2017	The Holocene 27:1 (2017): 98–109	https://doi.org/10.1177/0959683616652705
350	Ovicaprid	Capra/Ovis	UBA-20175	Havnø	Denmark	bone	ENI			-22.5	5.1			3.54	Gron & Rowley-Conwy 2017	The Holocene 27:1 (2017): 98–109	https://doi.org/10.1177/0959683616652705
351	Ovicaprid	Capra/Ovis	EA-SI-141	Taksai-2	Kazakhstan	bone				-19.46	6.77	44.23	15.88	3.3	Ananyevskaya et al. 2020	Journal of Archaeological Science: Reports 34 (2020) 102615	https://doi.org/10.1016/j.jasrep.2020.102615
352	Ovicaprid	Capra/Ovis	EA-SI-142	Taksai-2	Kazakhstan	bone				-20.31	5.58	46.76	16.42	3.3	Ananyevskaya et al. 2020	Journal of Archaeological Science: Reports 34 (2020) 102615	https://doi.org/10.1016/j.jasrep.2020.102615
353	Ovicaprid	Capra/Ovis	EA-SI-143	Taksai-2	Kazakhstan	bone				-20.62	5.82	43.7	14.78	3.5	Ananyevskaya et al. 2020	Journal of Archaeological Science: Reports 34 (2020) 102615	https://doi.org/10.1016/j.jasrep.2020.102615
354	Ovicaprid	Capra/Ovis	EA-SI-146	Taksai-2	Kazakhstan	bone				-20.83	5.98	40.43	14.28	3.3	Ananyevskaya et al. 2020	Journal of Archaeological Science: Reports 34 (2020) 102615	https://doi.org/10.1016/j.jasrep.2020.102615
355	Ovicaprid	Capra/Ovis	EA-SI-150	Taksai-3	Kazakhstan	bone				-19.47	6.54	46.49	16.39	3.3	Ananyevskaya et al. 2020	Journal of Archaeological Science: Reports 34 (2020) 102615	https://doi.org/10.1016/j.jasrep.2020.102615
356	Ovicaprid	Capra/Ovis	EA-SI-151	Taksai-3	Kazakhstan	bone				-19.12	7.66	44.69	15.82	3.3	Ananyevskaya et al. 2020	Journal of Archaeological Science: Reports 34 (2020) 102615	https://doi.org/10.1016/j.jasrep.2020.102615
357	Ovicaprid	Ovis sp.	841-02	Kałdus	Poland	bone	Medieval			-21.5	7.1	30.9	10.6	3.4	Reitsema et al 2017	Journal of Anthropological Archaeology 45 (2017): 38–52	https://doi.org/10.1016/j.jaa.2016.11.001
358	Pig/wild boar	Sus scrofa	360	Klin-Yar	Russia	Bone				-18.7	7.02			3.2	Higham et al. 2010	Proceedings of the 20th International Radiocarbon Conference, edited by A J T Jull RADIOCARBON, Vol 52, Nr 2–3, 2010, p 653–670	https://doi.org/10.1017/S0033822200045689
359	Pig/wild boar	Sus scrofa	Koban Sq 1 Bldg 4	Klin-Yar	Russia	Bone				-17.8	8.1			3.3	Higham et al. 2010	Proceedings of the 20th International Radiocarbon Conference, edited by A J T Jull RADIOCARBON, Vol 52, Nr 2–3, 2010, p 653–670	https://doi.org/10.1017/S0033822200045689
360	Pig/wild boar	Sus scrofa	Gor 2/3/5	Goryadchevodskiy	Russia	Bone				-19.5	5.8			3.1	Hollund et al. 2010	Journal of Archaeological Science 37 (2010) 2971e2998	https://doi.org/10.1016/j.jas.2010.08.009
361	Pig/wild boar	Sus scrofa	VeA23/II	Velikent	Russia	Bone				-19.1	9.47			3.16	Hollund et al. 2010	Journal of Archaeological Science 37 (2010) 2971e3021	https://doi.org/10.1016/j.jas.2010.08.009
362	Pig/wild boar	Sus	Bj 45:2	Birka	Sweden	bone				-19.9	9.7			3.4	Linderholm et al 2008a	Antiquity 82 (2008): 446–461	doi:10.1017/S0003598X00096939
363	Pig/wild boar	Sus	Ros31D	Rössberga	Sweden	bone	Neolithic			-21.9	4.8			3.3	Linderholm et al 2008a	Antiquity 82 (2008): 446–461	doi:10.1017/S0003598X00096939
364	Pig/wild boar	Sus	Ros32D	Rössberga	Sweden	bone	Neolithic			-22.4	4.8			3.4	Linderholm et al 2008a	Antiquity 82 (2008): 446–461	doi:10.1017/S0003598X00096939
365	Pig/wild boar	Sus	Sj 1	Birka	Sweden	bone				-21.3	13.8			3.4	Linderholm et al 2008a	Antiquity 82 (2008): 446–461	doi:10.1017/S0003598X00096939
366	Pig/wild boar	Sus		Björnedsgravfälted och Pukeborg	Sweden					-22.2	9.7			3.2	Andersson 2006	Andersson K Masters thesis 2006
367	Pig/wild boar	Sus	ALM92	Alvastra dolmen	Sweden	bone		1214	30	-21.8	11.4	41.6	16.4	3	Fornander 2011	Current Swedish Archaeology 19 (2011): 113–141	https://doi.org/10.37718/CSA.2011.09
368	Pig/wild boar	Sus	ALM97	Alvastra dolmen	Sweden	bone				-21.8	10	45.4	15.9	3.3	Fornander 2011	Current Swedish Archaeology 19 (2011): 113–141	https://doi.org/10.37718/CSA.2011.09
369	Pig/wild boar	Sus	ALM96	Alvastra dolmen	Sweden	bone		1197	30	-22	10.7	45.5	15.9	3.3	Fornander 2011	Current Swedish Archaeology 19 (2011): 113–141	https://doi.org/10.37718/CSA.2011.09
370	Pig/wild boar	Sus	ALM95	Alvastra dolmen	Sweden	bone				-21	11	45.4	15.7	3.4	Fornander 2011	Current Swedish Archaeology 19 (2011): 113–141	https://doi.org/10.37718/CSA.2011.09
371	Pig/wild boar	Sus domesticus	Sus	Sigtuna	Sweden	bone	Medieval			-21.9	9.6			2.9	Kjellström et al 2009	Journal of Archaeological Science 36 (2009): 2689–2699	https://doi.org/10.1016/j.jas.2009.08.007
372	Pig/wild boar	Sus domesticus	FRG78	Frälsegården passage grave	Sweden	bone	MN A			-21.8	6.2	38.4	14.1	3.2	Hinders 2011	Hinders J 2011 Master´s Thesis
373	Pig/wild boar	Sus domesticus	FRG79	Frälsegården passage grave	Sweden	bone	MN A			-21.1	6.2	40.7	14.5	3.3	Hinders 2011	Hinders J 2011 Master´s Thesis
374	Pig/wild boar	Sus domesticus	FRG80	Frälsegården passage grave	Sweden	bone	MN A			-21.3	6.8	41.4	14.7	3.3	Hinders 2011	Hinders J 2011 Master´s Thesis
375	Pig/wild boar	Sus domesticus	FRG81	Frälsegården passage grave	Sweden	bone	MN A			-21	6.3	44.6	15.6	3.3	Hinders 2011	Hinders J 2011 Master´s Thesis
376	Pig/wild boar	Sus domesticus	FRG82	Frälsegården passage grave	Sweden	bone	MN A			-21.1	6.4	47.1	15.9	3.5	Hinders 2011	Hinders J 2011 Master´s Thesis
377	Pig/wild boar	Sus domesticus	FRG83	Frälsegården passage grave	Sweden	bone	MN A			-21.5	6.2	41.5	15.1	3.2	Hinders 2011	Hinders J 2011 Master´s Thesis
378	Pig/wild boar	Sus domesticus	Karleby 63:57	Karleby Logården	Sweden	bone	MN A	4410	56	-22	5.8			3.19	Sjögren 2017	Journal of Archaeological Science: Reports 12 (2017): 295–306	https://doi.org/10.1016/j.jasrep.2017.01.044
379	Pig/wild boar	Sus domesticus	Karleby 63:62	Karleby Logården	Sweden	bone	MN A	4426	46	-21.9	4.8			3.22	Sjögren 2017	Journal of Archaeological Science: Reports 12 (2017): 295–306	https://doi.org/10.1016/j.jasrep.2017.01.044
380	Pig/wild boar	Sus domesticus	Karleby 63:63	Karleby Logården	Sweden	bone	MN A	4432	41	-21.3	4.4			3.21	Sjögren 2017	Journal of Archaeological Science: Reports 12 (2017): 295–306	https://doi.org/10.1016/j.jasrep.2017.01.044
381	Pig/wild boar	Sus domesticus	Karleby 63:76	Karleby Logården	Sweden	bone	MN A	4501	39	-21.9	5.8			3.21	Sjögren 2017	Journal of Archaeological Science: Reports 12 (2017): 295–306	https://doi.org/10.1016/j.jasrep.2017.01.044
382	Pig/wild boar	Sus domesticus	Karleby 63:77	Karleby Logården	Sweden	bone	MN A	4359	38	-22.1	4.8			3.22	Sjögren 2017	Journal of Archaeological Science: Reports 12 (2017): 295–306	https://doi.org/10.1016/j.jasrep.2017.01.044
383	Pig/wild boar	Sus	48	Skänninge Östegötland	Sweden		Medieval			-21.5	13.7	44.5	16.2	3.2	Arcini et al 2012	International Journal of Osteoarchaeology 24 (2012): 543–556	https://doi.org/10.1002/oa.2247
384	Pig/wild boar	Sus familiaris	F921	Björned; Torsåker Ångermanland	Sweden	bone	Late Iron Age			-22.2	9.7			3.2	Linderholm et al 2008b	Fornvännen 103 (2008): 176–189	http://kulturarvsdata.se/raa/fornvannen/2008_176
385	Pig/wild boar	Sus scrofa	AGE12	Ageröd I Munkarp Skåne	Sweden	bone	Neolithic early Atlantic			-21.3	4.5			3.4	Lidén et al 2004	Antiquity 78: 299 (2004): 23–33	https://doi.org/10.1017/S0003598X00092899
386	Pig/wild boar	Sus scrofa	AGE13	Ageröd I Munkarp Skåne	Sweden	bone	Neolithic early Atlantic			-21.3	4.6			3.4	Lidén et al 2004	Antiquity 78: 299 (2004): 23–33	https://doi.org/10.1017/S0003598X00092899
387	Pig/wild boar	Sus scrofa	IRE04	Ire Gotland	Sweden	bone	Neolithic Pitted ware			-20.1	6.9			3.3	Eriksson 2003	Eriksson G Doctoral dissertation 2003
388	Pig/wild boar	Sus scrofa	IRE06	Ire Gotland	Sweden	bone	Neolithic Pitted ware			-21.2	4.2			3.6	Eriksson 2003	Eriksson G Doctoral dissertation 2003
389	Pig/wild boar	Sus scrofa	IRE07	Ire Gotland	Sweden	bone	Neolithic Pitted ware			-21.4	3.8			3.6	Eriksson 2003	Eriksson G Doctoral dissertation 2003
390	Pig/wild boar	Sus scrofa	IRE51	Ire Gotland	Sweden	bone	Neolithic Pitted ware			-20.7	3.7			3.3	Eriksson 2003	Eriksson G Doctoral dissertation 2003
391	Pig/wild boar	Sus scrofa	IRE52	Ire Gotland	Sweden	bone	Neolithic Pitted ware			-21.4	4.3			3.4	Eriksson 2003	Eriksson G Doctoral dissertation 2003
392	Pig/wild boar	Sus scrofa	KOR13	Korsnäs; Grödinge RAÄ447	Sweden	bone	Neolithic Pitted ware			-21.8	4.6			3.5	Fornander et al 2008	Journal of Anthropological Archaeology 27 (2008): 281–297	https://doi.org/10.1016/j.jaa.2008.03.004
393	Pig/wild boar	Sus scrofa	KOR14	Korsnäs; Grödinge RAÄ447	Sweden	bone	Neolithic Pitted ware			-22	4.6			3.3	Fornander et al 2008	Journal of Anthropological Archaeology 27 (2008): 281–297	https://doi.org/10.1016/j.jaa.2008.03.004
394	Pig/wild boar	Sus scrofa	KOR15	Korsnäs; Grödinge RAÄ447	Sweden	bone	Neolithic Pitted ware			-21.5	4.8			3.4	Fornander et al 2008	Journal of Anthropological Archaeology 27 (2008): 281–297	https://doi.org/10.1016/j.jaa.2008.03.004
395	Pig/wild boar	Sus scrofa	KOR16	Korsnäs; Grödinge RAÄ447	Sweden	bone	Neolithic Pitted ware			-21.7	4.6			3.5	Fornander et al 2008	Journal of Anthropological Archaeology 27 (2008): 281–297	https://doi.org/10.1016/j.jaa.2008.03.004
396	Pig/wild boar	Sus scrofa	KOR17	Korsnäs; Grödinge RAÄ447	Sweden	bone	Neolithic Pitted ware			-21.9	4.8			3.5	Fornander et al 2008	Journal of Anthropological Archaeology 27 (2008): 281–297	https://doi.org/10.1016/j.jaa.2008.03.004
397	Pig/wild boar	Sus scrofa	KOR18	Korsnäs; Grödinge RAÄ447	Sweden	bone	Neolithic Pitted ware	4275	40	-21.3	4.3			3.2	Fornander et al 2008	Journal of Anthropological Archaeology 27 (2008): 281–297	https://doi.org/10.1016/j.jaa.2008.03.004
398	Pig/wild boar	Sus scrofa	VÄS115	Västerbjers Gotland	Sweden	bone	Neolithic Pitted ware			-21.8	4.6			3.3	Eriksson 2003	Eriksson G Doctoral dissertation 2003
399	Pig/wild boar	Sus scrofa	21	Ageröd V	Sweden	bone	MM			-22.1	4.9	42.5	14.4	3.45	Boethius & Ahlström 2018	Journal of Archaeological Science 93 (2018): 196–210	https://doi.org/10.1016/j.jas.2018.02.018
400	Pig/wild boar	Sus scrofa	142	Balltorp	Sweden	bone	EM			-21.9	5.8	43	15.4	3.26	Boethius & Ahlström 2018	Journal of Archaeological Science 93 (2018): 196–210	https://doi.org/10.1016/j.jas.2018.02.018
401	Pig/wild boar	Sus scrofa	144	Balltorp	Sweden	bone	EM			-21.9	6.7	34.5	11.9	3.37	Boethius & Ahlström 2018	Journal of Archaeological Science 93 (2018): 196–210	https://doi.org/10.1016/j.jas.2018.02.018
402	Pig/wild boar	Sus scrofa	149	Balltorp	Sweden	bone	EM			-21.9	6.1	41.3	14.7	3.279	Boethius & Ahlström 2018	Journal of Archaeological Science 93 (2018): 196–210	https://doi.org/10.1016/j.jas.2018.02.018
403	Pig/wild boar	Sus scrofa	176	Almeö 96 b	Sweden	bone	EM			-22.4	6.2	42.4	14.1	3.505	Boethius & Ahlström 2018	Journal of Archaeological Science 93 (2018): 196–210	https://doi.org/10.1016/j.jas.2018.02.018
404	Pig/wild boar	Sus scrofa	179	Almeö 96 b	Sweden	bone	EM			-22.2	5.8	42.5	13.9	3.574	Boethius & Ahlström 2018	Journal of Archaeological Science 93 (2018): 196–210	https://doi.org/10.1016/j.jas.2018.02.018
405	Pig/wild boar	Sus scrofa	182	Almeö 96 b	Sweden	bone	EM			-22.3	5.7	45.1	15.2	3.462	Boethius & Ahlström 2018	Journal of Archaeological Science 93 (2018): 196–210	https://doi.org/10.1016/j.jas.2018.02.018
406	Pig/wild boar	Sus scrofa	191	Segebro	Sweden	bone	MM			-21.2	5.1	43.4	15.7	3.225	Boethius & Ahlström 2018	Journal of Archaeological Science 93 (2018): 196–210	https://doi.org/10.1016/j.jas.2018.02.018
407	Pig/wild boar	Sus scrofa	193	Segebro	Sweden	bone	MM			-21	6.1	43.1	15.5	3.252	Boethius & Ahlström 2018	Journal of Archaeological Science 93 (2018): 196–210	https://doi.org/10.1016/j.jas.2018.02.018
408	Pig/wild boar	Sus scrofa	206	Ageröd I:A	Sweden	bone	EM			-21.9	4.2	44.2	14.2	3.626	Boethius & Ahlström 2018	Journal of Archaeological Science 93 (2018): 196–210	https://doi.org/10.1016/j.jas.2018.02.018
409	Pig/wild boar	Sus scrofa	218	Bökeberg	Sweden	NA	LM			-21.3	4.5	43.7	15.5	3.283	Boethius & Ahlström 2018	Journal of Archaeological Science 93 (2018): 196–210	https://doi.org/10.1016/j.jas.2018.02.018
410	Pig/wild boar	Sus scrofa	300	Huseby klev	Sweden	bone	EM			-21.3	4.5	44.1	15.1	3.414	Boethius & Ahlström 2018	Journal of Archaeological Science 93 (2018): 196–210	https://doi.org/10.1016/j.jas.2018.02.018
411	Pig/wild boar	Sus scrofa	301	Huseby klev	Sweden	bone	EM			-21.7	1.8	37.4	12.5	3.501	Boethius & Ahlström 2018	Journal of Archaeological Science 93 (2018): 196–210	https://doi.org/10.1016/j.jas.2018.02.018
412	Pig/wild boar	Sus scrofa	320	Huseby klev	Sweden	bone	EM			-21.2	3.8	44	15.7	3.275	Boethius & Ahlström 2018	Journal of Archaeological Science 93 (2018): 196–210	https://doi.org/10.1016/j.jas.2018.02.018
413	Pig/wild boar	Sus scrofa	337	Huseby klev	Sweden	bone	EM			-21.2	3.7	37.8	13.1	3.369	Boethius & Ahlström 2018	Journal of Archaeological Science 93 (2018): 196–210	https://doi.org/10.1016/j.jas.2018.02.018
414	Pig/wild boar	Sus scrofa	354	Sunnansund	Sweden	bone	EM			-22	6.5	35.5	11.5	3.596	Boethius & Ahlström 2018	Journal of Archaeological Science 93 (2018): 196–210	https://doi.org/10.1016/j.jas.2018.02.018
415	Pig/wild boar	Sus scrofa	MKA 12	Motala Kanaljorden	Sweden	bone	Mesolithic			-19.2	12.3	40.6	14.4	3.3	Eriksson et al 2018	Journal of Archaeological Science: Reports 17 (2018): 904–918	https://doi.org/10.1016/j.jasrep.2016.05.052
416	Pig/wild boar	Sus scrofa	MKA 43	Motala Kanaljorden	Sweden	bone	Mesolithic	6521	124	-21.8	4.9	40.3	13.9	3.4	Eriksson et al 2018	Journal of Archaeological Science: Reports 17 (2018): 904–918	https://doi.org/10.1016/j.jasrep.2016.05.052
417	Pig/wild boar	Sus scrofa	MKA 44	Motala Kanaljorden	Sweden	bone	Mesolithic	6685	42	-21.7	4.9	35.2	11.6	3.5	Eriksson et al 2018	Journal of Archaeological Science: Reports 17 (2018): 904–918	https://doi.org/10.1016/j.jasrep.2016.05.052
418	Pig/wild boar	Sus scrofa	MKA 47	Motala Kanaljorden	Sweden	bone	Mesolithic	6780	53	-21.3	6.5	40.5	14.6	3.2	Eriksson et al 2018	Journal of Archaeological Science: Reports 17 (2018): 904–918	https://doi.org/10.1016/j.jasrep.2016.05.052
419	Pig/wild boar	Sus scrofa	MKA 48	Motala Kanaljorden	Sweden	bone	Mesolithic			-21.2	5.7	41.4	14.5	3.3	Eriksson et al 2018	Journal of Archaeological Science: Reports 17 (2018): 904–918	https://doi.org/10.1016/j.jasrep.2016.05.052
420	Pig/wild boar	Sus scrofa	MKA 52	Motala Kanaljorden	Sweden	bone	Mesolithic	6935	47	-22	5.3	39	13.1	3.5	Eriksson et al 2018	Journal of Archaeological Science: Reports 17 (2018): 904–918	https://doi.org/10.1016/j.jasrep.2016.05.052
421	Pig/wild boar	Sus scrofa	MKA 62	Motala Kanaljorden	Sweden	bone	Mesolithic			-20.5	5.5	38.6	13.7	3.3	Eriksson et al 2018	Journal of Archaeological Science: Reports 17 (2018): 904–918	https://doi.org/10.1016/j.jasrep.2016.05.052
422	Pig/wild boar	Sus scrofa	MKA 63	Motala Kanaljorden	Sweden	bone	Mesolithic			-20.9	4.8	40.7	13.9	3.4	Eriksson et al 2018	Journal of Archaeological Science: Reports 17 (2018): 904–918	https://doi.org/10.1016/j.jasrep.2016.05.052
423	Pig/wild boar	Sus scrofa	MKA 88	Motala Kanaljorden	Sweden	bone	Mesolithic	6776	31	-22.6	5.3	36.7	12.5	3.4	Eriksson et al 2018	Journal of Archaeological Science: Reports 17 (2018): 904–918	https://doi.org/10.1016/j.jasrep.2016.05.052
424	Pig/wild boar	Sus scrofa	MKA 96	Motala Kanaljorden	Sweden	bone	Mesolithic			-27.5	8.3	35	11.3	3.6	Eriksson et al 2018	Journal of Archaeological Science: Reports 17 (2018): 904–918	https://doi.org/10.1016/j.jasrep.2016.05.052
425	Pig/wild boar	Sus scrofa	MOT 010	Motala Strandvägen	Sweden	bone	Mesolithic	6327	38	-21.6	4.4	37.3	12.8	3.4	Eriksson et al 2018	Journal of Archaeological Science: Reports 17 (2018): 904–918	https://doi.org/10.1016/j.jasrep.2016.05.052
426	Pig/wild boar	Sus scrofa	MOT 026	Motala Strandvägen	Sweden	bone	Mesolithic	6423	49	-21.4	5.3	41.5	13.8	3.5	Eriksson et al 2018	Journal of Archaeological Science: Reports 17 (2018): 904–918	https://doi.org/10.1016/j.jasrep.2016.05.052
427	Pig/wild boar	Sus scrofa	MOT 027	Motala Strandvägen	Sweden	bone	Mesolithic	6480	167	-21.5	3.8	39	12.7	3.6	Eriksson et al 2018	Journal of Archaeological Science: Reports 17 (2018): 904–918	https://doi.org/10.1016/j.jasrep.2016.05.052
428	Pig/wild boar	Sus scrofa	MOT 028	Motala Strandvägen	Sweden	bone	Mesolithic	6485	77	-20.9	4	42.5	14.9	3.3	Eriksson et al 2018	Journal of Archaeological Science: Reports 17 (2018): 904–918	https://doi.org/10.1016/j.jasrep.2016.05.052
429	Pig/wild boar	Sus scrofa	MOT 045	Motala Strandvägen	Sweden	dentine	Mesolithic	6291	70	-21.4	5.5	39.4	13.3	3.5	Eriksson et al 2018	Journal of Archaeological Science: Reports 17 (2018): 904–918	https://doi.org/10.1016/j.jasrep.2016.05.052
430	Pig/wild boar	Sus scrofa	KOP155	Köpingsvik Öland	Sweden	dentine				-22	9.5	34.8	13.6	3	Linderholm et al 2014	Internet Archaeology 37 (2014)	https://doi.org/10.11141/ia.37.9
431	Pig/wild boar	Sus scrofa	KOP156	Köpingsvik Öland	Sweden	dentine				-21.1	4.3	35.1	13.5	3	Linderholm et al 2014	Internet Archaeology 37 (2014)	https://doi.org/10.11141/ia.37.9
432	Pig/wild boar	Sus scrofa	RES126	Resmo Öland	Sweden	dentine				-21.7	7.5	35.9	13.6	3.1	Linderholm et al 2014	Internet Archaeology 37 (2014)	https://doi.org/10.11141/ia.37.9
433	Pig/wild boar	Sus scrofa	RES143	Resmo Öland	Sweden	dentine				-20.9	5.3	42.9	15.4	3.3	Linderholm et al 2014	Internet Archaeology 37 (2014)	https://doi.org/10.11141/ia.37.9
434	Pig/wild boar	Sus scrofa	TOR31	Torsborg Öland	Sweden	dentine				-22	6.3	41.5	16.1	3	Linderholm et al 2014	Internet Archaeology 37 (2014)	https://doi.org/10.11141/ia.37.9
435	Pig/wild boar	Sus scrofa	TOR32	Torsborg Öland	Sweden	dentine				-22.1	6.5	40.1	16.1	2.9	Linderholm et al 2014	Internet Archaeology 37 (2014)	https://doi.org/10.11141/ia.37.9
436	Pig/wild boar	Sus scrofa	VÄS123	Västerbjers Gotland	Sweden	dentine	Neolithic Pitted ware			-20.6	6.2			3.3	Eriksson 2003	Eriksson G Doctoral dissertation 2003
437	Pig/wild boar	Sus scrofa	VÄS124	Västerbjers Gotland	Sweden	dentine	Neolithic Pitted ware			-20.8	4.9			3.3	Eriksson 2003	Eriksson G Doctoral dissertation 2003
438	Pig/wild boar	Sus scrofa	VÄS125	Västerbjers Gotland	Sweden	dentine	Neolithic Pitted ware			-20.9	5			3.4	Eriksson 2003	Eriksson G Doctoral dissertation 2003
439	Pig/wild boar	Sus scrofa	VÄS126	Västerbjers Gotland	Sweden	dentine	Neolithic Pitted ware			-21.6	4.5			3.2	Eriksson 2003	Eriksson G Doctoral dissertation 2003
440	Pig/wild boar	Sus scrofa	VÄS127	Västerbjers Gotland	Sweden	dentine	Neolithic Pitted ware			-20.8	6.1			3.5	Eriksson 2003	Eriksson G Doctoral dissertation 2003
441	Pig/wild boar	Sus scrofa	VÄS128	Västerbjers Gotland	Sweden	dentine	Neolithic Pitted ware			-21.1	6.4			3.4	Eriksson 2003	Eriksson G Doctoral dissertation 2003
442	Pig/wild boar	Sus scrofa	VÄS99	Västerbjers Gotland	Sweden	dentine	Neolithic Pitted ware			-21.2	5.2			3.2	Eriksson 2003	Eriksson G Doctoral dissertation 2003
443	Pig/wild boar	Sus scrofa	338	Huseby klev	Sweden	dentine	EM			-21.8	4.7	43.4	15.1	3.355	Boethius & Ahlström 2018	Journal of Archaeological Science 93 (2018): 196–210	https://doi.org/10.1016/j.jas.2018.02.018
444	Pig/wild boar	Sus scrofa	MKA 41	Motala Kanaljorden	Sweden	dentine	Mesolithic			-21.1	4.7	39.5	14.1	3.3	Eriksson et al 2018	Journal of Archaeological Science: Reports 17 (2018): 904–918	https://doi.org/10.1016/j.jasrep.2016.05.052
445	Pig/wild boar	Sus scrofa	VÄS156	Västerbjers Gotland	Sweden	tusk	Neolithic Pitted ware			-21.2	5.3			3.2	Eriksson 2003	Eriksson G Doctoral dissertation 2003
446	Pig/wild boar	Sus scrofa	VÄS157	Västerbjers Gotland	Sweden	tusk	Neolithic Pitted ware			-20.6	5.4			3.2	Eriksson 2003	Eriksson G Doctoral dissertation 2003
447	Pig/wild boar	Sus	BER-3	Stavanger cathedral	Norway	bone	before 1125 AD			-21.6	12.1	43.9	15.5	3.3	van der Sluis et al 2016	Journal of Archaeological Science: Reports 9 (2016): 120–133	https://doi.org/10.1016/j.jasrep.2016.06.054
448	Pig/wild boar	Sus	BER-3	Stavanger cathedral	Norway	bone	before 1125 AD			-21.6	12.2	43.5	15.2	3.3	van der Sluis et al 2016	Journal of Archaeological Science: Reports 9 (2016): 120–133	https://doi.org/10.1016/j.jasrep.2016.06.054
449	Pig/wild boar	Sus	BER-4	Stavanger cathedral	Norway	bone	before 1125 AD			-21.9	7.4	43.1	15.6	3.2	van der Sluis et al 2016	Journal of Archaeological Science: Reports 9 (2016): 120–133	https://doi.org/10.1016/j.jasrep.2016.06.054
450	Pig/wild boar	Sus	BER-4	Stavanger cathedral	Norway	bone	before 1125 AD			-21.8	7.3	44.4	15.7	3.3	van der Sluis et al 2016	Journal of Archaeological Science: Reports 9 (2016): 120–133	https://doi.org/10.1016/j.jasrep.2016.06.054
451	Pig/wild boar	Sus domesticus	BOSVIN2	Bofa/Tornegård	Denmark	bone				-21.3	8.9	42	14.7	3.3	Jørkov et al 2010	American Journal of Biological Anthropology 143:4 (2010): 523–533	https://doi.org/10.1002/ajpa.21346
452	Pig/wild boar	Sus domesticus	HISVIN	Himlingøje	Denmark	bone				-22.3	9.6	43.1	15.2	3.3	Jørkov et al 2010	American Journal of Biological Anthropology 143:4 (2010): 523–533	https://doi.org/10.1002/ajpa.21346
453	Pig/wild boar	Sus domesticus	SKSVIN	Skovgårde	Denmark	bone				-22.5	8.7	44	16	3.2	Jørkov et al 2010	American Journal of Biological Anthropology 143:4 (2010): 523–533	https://doi.org/10.1002/ajpa.21346
454	Pig/wild boar	Sus scrofa	2911DOE	Bjørnsholm	Denmark	bone	Late Mesolithic Ertebølle			-23.7	3.3			3.15	Craig et al 2006	Journal of Archaeological Science 33 (2006): 1642–1646	https://doi.org/10.1016/j.jas.2006.05.006
455	Pig/wild boar	Sus scrofa	2911ZSE	Bjørnsholm	Denmark	bone	Late Mesolithic Ertebølle			-21	2.2			3.06	Craig et al 2006	Journal of Archaeological Science 33 (2006): 1642–1646	https://doi.org/10.1016/j.jas.2006.05.006
456	Pig/wild boar	Sus domesticus	GUsi9205	Tallinn, Sauna St 10	Estonia	bone	Medieval			-21.9	7.2	40.3	14.4	3.3	Aguraiuja-Lätti et al. 2022	PLoS ONE 17(12): e0279583	https://doi.org/10.1371/journal.pone.0279583
457	Pig/wild boar	Sus domesticus	GUsi9209	Tallinn, Sauna St 10	Estonia	bone	Medieval			-22.2	11.1	20.5	7.5	3.2	Aguraiuja-Lätti et al. 2022	PLoS ONE 17(12): e0279583	https://doi.org/10.1371/journal.pone.0279583
458	Pig/wild boar	Sus domesticus	GUsi9795	Tallinn, Vabaduse Sq	Estonia	bone	Medieval			-21.6	8.1	43	14.5	3.4	Aguraiuja-Lätti et al. 2022	PLoS ONE 17(12): e0279583	https://doi.org/10.1371/journal.pone.0279583
459	Pig/wild boar	Sus domesticus	GUsi9214	Tallinn, Vabaduse Sq	Estonia	bone	Medieval			-21.5	9.4	42.8	15.9	3.1	Aguraiuja-Lätti et al. 2022	PLoS ONE 17(12): e0279583	https://doi.org/10.1371/journal.pone.0279583
460	Pig/wild boar	Sus domesticus	GUsi9797	Tallinn, Vabaduse Sq	Estonia	bone	Medieval			-20.9	10.5	42.3	14.4	3.4	Aguraiuja-Lätti et al. 2022	PLoS ONE 17(12): e0279583	https://doi.org/10.1371/journal.pone.0279583
461	Pig/wild boar	Sus domesticus	GUsi9223	Tallinn, Jahu St 6	Estonia	bone	Medieval			-21.1	10	42.3	14.3	3.4	Aguraiuja-Lätti et al. 2022	PLoS ONE 17(12): e0279583	https://doi.org/10.1371/journal.pone.0279583
462	Pig/wild boar	Sus domesticus	GUsi9224	Tallinn, Jahu St 6	Estonia	bone	Medieval			-20.9	9.3	38.2	12.6	3.5	Aguraiuja-Lätti et al. 2022	PLoS ONE 17(12): e0279583	https://doi.org/10.1371/journal.pone.0279583
463	Pig/wild boar	Sus domesticus	GUsi9225	Tallinn, Jahu St 6	Estonia	bone	Medieval			-22.1	7.8	43.5	14.2	3.6	Aguraiuja-Lätti et al. 2022	PLoS ONE 17(12): e0279583	https://doi.org/10.1371/journal.pone.0279583
464	Pig/wild boar	Sus domesticus	KIA-55654	Lehmja (settlement)	Estonia	bone	Early Modern	223	21	-21.9	8.1	41.5	15.4	3.1	Aguraiuja-Lätti et al. 2022	PLoS ONE 17(12): e0279583	https://doi.org/10.1371/journal.pone.0279583
465	Pig/wild boar	Sus domesticus	KIA-55260	Muuksi (cemetery)	Estonia	bone	Iron Age (Roman Iron Age)	1806	24	-21.4	8.8	38.1	14.2	3.1	Aguraiuja-Lätti et al. 2022	PLoS ONE 17(12): e0279583	https://doi.org/10.1371/journal.pone.0279583
466	Pig/wild boar	cf. Sus domesticus	KIA-55276	Kunda Hiiemäe (tarand cemetery)	Estonia	bone	Iron Age (Migration Period)	1564	21	-20.5	9.7	40.6	15.1	3.1	Aguraiuja-Lätti et al. 2022	PLoS ONE 17(12): e0279583	https://doi.org/10.1371/journal.pone.0279583
467	Pig/wild boar	Sus domesticus	KIA-55257	Pada (settlement)	Estonia	bone	Iron Age (Viking Age)	1179	19	-20.9	5.8	40.1	14.9	3.1	Aguraiuja-Lätti et al. 2022	PLoS ONE 17(12): e0279583	https://doi.org/10.1371/journal.pone.0279583
468	Pig/wild boar	Sus domesticus	GUsi9819	Valjala hill fort	Estonia	bone	Iron Age (Late Iron Age)			-22.3	6.3	44.1	14.5	3.5	Aguraiuja-Lätti et al. 2022	PLoS ONE 17(12): e0279583	https://doi.org/10.1371/journal.pone.0279583
469	Pig/wild boar	Sus domesticus	GUsi10831/Poz-135547	Pöide hill fort	Estonia	bone	Iron Age (Late Iron Age)	870	30	-20.5	8.1	42	14.4	3.4	Aguraiuja-Lätti et al. 2022	PLoS ONE 17(12): e0279583	https://doi.org/10.1371/journal.pone.0279583
470	Pig/wild boar	Sus domesticus	GUsi10833/Poz-135551	Pöide hill fort	Estonia	bone	Iron Age (Viking Age/Late Iron Age)	975	30	-22.3	8.2	40.1	13.5	3.5	Aguraiuja-Lätti et al. 2022	PLoS ONE 17(12): e0279583	https://doi.org/10.1371/journal.pone.0279583
471	Pig/wild boar	Sus domesticus	KIA-55264	Viira (cemetery)	Estonia	bone	Early Modern	233	26	-23	6.3	41	15.2	3.1	Aguraiuja-Lätti et al. 2022	PLoS ONE 17(12): e0279583	https://doi.org/10.1371/journal.pone.0279583
472	Pig/wild boar	Sus domesticus	GUsi10826	Pärnu, Põhja Blvd	Estonia	bone	Medieval			-22.7	5.3	43.2	13.9	3.6	Aguraiuja-Lätti et al. 2022	PLoS ONE 17(12): e0279583	https://doi.org/10.1371/journal.pone.0279583
473	Pig/wild boar	Sus domesticus	GUsi10827	Pärnu, Põhja Blvd	Estonia	bone	Medieval			-21.5	9.1	43.1	14.1	3.6	Aguraiuja-Lätti et al. 2022	PLoS ONE 17(12): e0279583	https://doi.org/10.1371/journal.pone.0279583
474	Pig/wild boar	Sus domesticus	GUsi10828	Pärnu, Põhja Blvd	Estonia	bone	Early Modern			-22.2	8.6	41.5	14.4	3.4	Aguraiuja-Lätti et al. 2022	PLoS ONE 17(12): e0279583	https://doi.org/10.1371/journal.pone.0279583
475	Pig/wild boar	Sus domesticus	GUsi10815	Rakvere, Pikk St	Estonia	bone	Early Modern			-21.6	9.3	38.6	13.2	3.4	Aguraiuja-Lätti et al. 2022	PLoS ONE 17(12): e0279583	https://doi.org/10.1371/journal.pone.0279583
476	Pig/wild boar	Sus domesticus	KIA-55268	Varbola hill fort	Estonia	bone	Iron Age (Late Iron Age)	884	20	-22.1	6.4	38.2	14	3.2	Aguraiuja-Lätti et al. 2022	PLoS ONE 17(12): e0279583	https://doi.org/10.1371/journal.pone.0279583
477	Pig/wild boar	Sus domesticus	GUsi10842	Sargvere (settlement)	Estonia	bone	Medieval			-21.9	8.4	42.7	14.6	3.4	Aguraiuja-Lätti et al. 2022	PLoS ONE 17(12): e0279583	https://doi.org/10.1371/journal.pone.0279583
478	Pig/wild boar	Sus domesticus	GUsi10843	Sargvere (settlement)	Estonia	bone	Medieval			-21.8	9.2	43.5	14.3	3.5	Aguraiuja-Lätti et al. 2022	PLoS ONE 17(12): e0279583	https://doi.org/10.1371/journal.pone.0279583
479	Pig/wild boar	Sus domesticus	GUsi10844	Sargvere (settlement)	Estonia	bone	Medieval			-20.9	7.5	40.5	13.8	3.4	Aguraiuja-Lätti et al. 2022	PLoS ONE 17(12): e0279583	https://doi.org/10.1371/journal.pone.0279583
480	Pig/wild boar	Sus domesticus	KIA-55058	Kunila (cemetery)	Estonia	bone	Early Modern	289	24	-22.4	9.7	40.4	14.8	3.2	Aguraiuja-Lätti et al. 2022	PLoS ONE 17(12): e0279583	https://doi.org/10.1371/journal.pone.0279583
481	Pig/wild boar	Sus domesticus	KIA-55666	Kuigatsi hill fort	Estonia	bone	Iron Age (Viking Age)	1171	23	-22.3	6.8	40.1	14.7	3.2	Aguraiuja-Lätti et al. 2022	PLoS ONE 17(12): e0279583	https://doi.org/10.1371/journal.pone.0279583
482	Pig/wild boar	Sus domesticus	GUsi10226	Tartu, Jakobi St 2	Estonia	bone	Medieval			-21.8	9.4	43.9	15.3	3.3	Aguraiuja-Lätti et al. 2022	PLoS ONE 17(12): e0279583	https://doi.org/10.1371/journal.pone.0279583
483	Pig/wild boar	Sus domesticus	GUsi10231	Tartu, Lutsu St 12	Estonia	bone	Medieval			-22.8	6.4	45.5	15.7	3.4	Aguraiuja-Lätti et al. 2022	PLoS ONE 17(12): e0279583	https://doi.org/10.1371/journal.pone.0279583
484	Pig/wild boar	Sus domesticus	GUsi10238	Viljandi, Pikk St 4	Estonia	bone	Medieval			-21.4	9.4	45.6	15.8	3.4	Aguraiuja-Lätti et al. 2022	PLoS ONE 17(12): e0279583	https://doi.org/10.1371/journal.pone.0279583
485	Pig/wild boar	Sus domesticus	GUsi10479	Viljandi Museum yard	Estonia	bone	Medieval			-21.9	8.3	42.2	14.3	3.4	Aguraiuja-Lätti et al. 2022	PLoS ONE 17(12): e0279583	https://doi.org/10.1371/journal.pone.0279583
486	Pig/wild boar	Sus domesticus	GUsi10489	Viljandi Castle	Estonia	bone	Medieval			-22	7	42.1	14.2	3.5	Aguraiuja-Lätti et al. 2022	PLoS ONE 17(12): e0279583	https://doi.org/10.1371/journal.pone.0279583
487	Pig/wild boar	Sus domesticus	GUsi10490	Viljandi Castle	Estonia	bone	Medieval			-21.9	9.1	42.6	14.1	3.5	Aguraiuja-Lätti et al. 2022	PLoS ONE 17(12): e0279583	https://doi.org/10.1371/journal.pone.0279583
488	Pig/wild boar	Sus domesticus	GUsi10811	Vastseliina Castle	Estonia	bone	Early Modern			-22.1	7.8	42.7	13.7	3.6	Aguraiuja-Lätti et al. 2022	PLoS ONE 17(12): e0279583	https://doi.org/10.1371/journal.pone.0279583
489	Pig/wild boar	Sus scrofa	GUsi9824	Otepää hill fort	Estonia	bone	Iron Age (Pre-Viking/Viking/Late Iron Age)			-23.2	5.2	41.3	14.2	3.4	Aguraiuja-Lätti et al. 2022	PLoS ONE 17(12): e0279583	https://doi.org/10.1371/journal.pone.0279583
490	Pig/wild boar	Sus scrofa	KIA-55659	Otepää hill fort	Estonia	bone	Medieval	761	20	-22.7	6.6	41.9	15.3	3.2	Aguraiuja-Lätti et al. 2022	PLoS ONE 17(12): e0279583	https://doi.org/10.1371/journal.pone.0279583
491	Pig/wild boar	Sus domesticus	KIA-55651	Jõelähtme Teemeistri (stone-cist graves)	Estonia	dentine	Iron Age (Migration Period)	1518	23	-22.3	8.4	40.4	14.9	3.2	Aguraiuja-Lätti et al. 2022	PLoS ONE 17(12): e0279583	https://doi.org/10.1371/journal.pone.0279583
492	Pig/wild boar	Sus domesticus		Daktariškė 5	Lithuania	bone	Bronze Age			-21.7	4.5	45.9	16.4	3.3	Piličiauskas et al 2017a	Journal of Archaological Science: Reports 14 (2017): 530–542	https://doi.org/10.1016/j.jasrep.2017.06.004
493	Pig/wild boar	Sus domesticus	ŽPVR 32	The lower castle of Vilnius and The Palace of the Grand Dukes of Lithuania; Vilnius	Lithuania	bone	16–17th C AD			-21.3	8.5	35.1	12.6	3.2	Simčenka et al 2020	Archaeological and Anthropological Sciences 12 (2020): 1–14	https://doi.org/10.1007/s12520-020-01063-9
494	Pig/wild boar	Sus scrofa	38	Žemaitiškė 1	Lithuania	bone	Late neolithic			-23.3	6.5			3.5	Antanaitis-Jacobs et al 2009	Archaeologia Baltica 12 (2019): 12–30
495	Pig/wild boar	Sus scrofa	46	Šventoji 3	Lithuania	bone	Late neolithic			-21.7	5.5			3.4	Antanaitis-Jacobs et al 2009	Archaeologia Baltica 12 (2019): 12–30
496	Pig/wild boar	Sus scrofa	52	Šventoji 6	Lithuania	bone	Late neolithic			-21.6	5.3			3.4	Antanaitis-Jacobs et al 2009	Archaeologia Baltica 12 (2019): 12–30
497	Pig/wild boar	Sus scrofa	ŽPVR 34	The lower castle of Vilnius and The Palace of the Grand Dukes of Lithuania; Vilnius	Lithuania	bone	16–17th C AD			-21.7	5.9	41.3	14.7	3.3	Simčenka et al 2020	Archaeological and Anthropological Sciences 12 (2020): 1–14	https://doi.org/10.1007/s12520-020-01063-9
498	Pig/wild boar	Sus scrofa scrofa		Žemaitiškė 2	Lithuania	bone	Subneolithic			-23.1	4.6	32.8	12	3.2	Piličiauskas et al 2017a	Journal of Archaological Science: Reports 14 (2017): 530–542	https://doi.org/10.1016/j.jasrep.2017.06.004
499	Pig/wild boar	Sus scrofa scrofa		Žemaitiškė 2	Lithuania	bone	Subneolithic			-22.4	4.1	43.7	15.8	3.2	Piličiauskas et al 2017a	Journal of Archaological Science: Reports 14 (2017): 530–542	https://doi.org/10.1016/j.jasrep.2017.06.004
500	Pig/wild boar	Sus scrofa/domesticus		Žemaitiškė 2	Lithuania	bone	Subneolithic			-21.4	3.8	44.5	15.8	3.3	Piličiauskas et al 2017a	Journal of Archaological Science: Reports 14 (2017): 530–542	https://doi.org/10.1016/j.jasrep.2017.06.004
501	Pig/wild boar	Sus scrofa/domesticus		Šventoji 43	Lithuania	bone	Subneolithic			-22.2	6.9	44.8	16.3	3.2	Piličiauskas et al 2017b	Archaeological and Anthropological Sciences 9:7 (2017): 1421–1437	https://doi.org/10.1007/s12520-017-0463-z
502	Pig/wild boar	Sus scrofa/Sus suis	45	Šventoji 3	Lithuania	bone	Middle/Late neolithic			-21.3	3.8			3.3	Antanaitis-Jacobs et al 2009	Archaeologia Baltica 12 (2019): 12–30
503	Pig/wild boar	Sus scrofa/Sus suis	58	Šventoji 1B	Lithuania	bone	Middle/Late neolithic			-21.8	4.1			3.4	Antanaitis-Jacobs et al 2009	Archaeologia Baltica 12 (2019): 12–30
504	Pig/wild boar	Sus scrofa/Sus suis	96	Kretuonas 1B	Lithuania	bone	Middle neolithic			-23.6	6.4			3.5	Antanaitis-Jacobs et al 2009	Archaeologia Baltica 12 (2019): 12–30
505	Pig/wild boar	Sus domesticus	Dau23	Daugmale hillfort	Latvia	bone	11th-13th C AD			-22.4	6.2	41	15	3.2	Gunnarssone et al 2020	Estonian Journal of Archaeology 24:1 (2020): 45–69	https://doi.org/10.3176/arch.2020.1.02
506	Pig/wild boar	Sus domesticus	OKAJA-3-P	Oulu Kajaaninkatu	Finland	bone	Preindustrial			-22.3	5.5	43.54	14.98	3.4	Lahtinen & Salmi 2018	Environmental Archaeology 24:1 (2018): 1–14	https://doi.org/10.1080/14614103.2018.1444695
507	Pig/wild boar	Sus domesticus	OPIK-3-P	Oulu Pikisaari	Finland	bone	Preindustrial			-21.7	9.9	43.52	14.58	3.5	Lahtinen & Salmi 2018	Environmental Archaeology 24:1 (2018): 1–14	https://doi.org/10.1080/14614103.2018.1444695
508	Pig/wild boar	Sus scrofa	KM7089:6 (sample 42)	Valkeakoski Rapola	Finland	bone				-22	5.2		12.9	2.9	K. Mannermaa; unpublished data	unpublished
509	Pig/wild boar	Sus domesticus	Sus 1	Eura Luistari	Finland	dentine	600-800 CE			-22.8	11.9	32.3	10.9	3.5	Etu-Sihvola et al 2019	Journal of Archaeological Science: Reports 24 (2019): 1003–1013	https://doi.org/10.1016/j.jasrep.2019.03.005
510	Pig/wild boar	Sus scrofa	100	Kałdus	Poland	bone	Medieval			-21.6	7.9	44.5	16.1	3.2	Reitsema et al 2017	Journal of Anthropological Archaeology 45 (2017): 38–52	https://doi.org/10.1016/j.jaa.2016.11.001
511	Pig/wild boar	Sus scrofa	119-05	Kałdus	Poland	bone	Medieval			-21.6	5.9	35.6	12.9	3.2	Reitsema et al 2017	Journal of Anthropological Archaeology 45 (2017): 38–52	https://doi.org/10.1016/j.jaa.2016.11.001
512	Pig/wild boar	Sus scrofa	816-02	Kałdus	Poland	bone	Medieval			-19.8	6.8	37.6	13.2	3.3	Reitsema et al 2017	Journal of Anthropological Archaeology 45 (2017): 38–52	https://doi.org/10.1016/j.jaa.2016.11.001
513	Pig/wild boar	Sus scrofa	Mz22	Szczepanki	Poland	bone	Mesolithic			-23.2	6.6	40.2	14.4	3.3	Tomczyk et al 2020	Journal of Archaeological Science: Reports 29 (2020): 102141	https://doi.org/10.1016/j.jasrep.2019.102141
514	Pig/wild boar	Sus scrofa	Mz23	Szczepanki	Poland	bone	Mesolithic			-21.5	5.9	38	12.5	3.6	Tomczyk et al 2020	Journal of Archaeological Science: Reports 29 (2020): 102141	https://doi.org/10.1016/j.jasrep.2019.102141
515	Pig/wild boar	Sus scrofa	Mz24	Szczepanki	Poland	bone	Mesolithic			-22.1	5.6	39.5	14.1	3.3	Tomczyk et al 2020	Journal of Archaeological Science: Reports 29 (2020): 102141	https://doi.org/10.1016/j.jasrep.2019.102141
516	Pig/wild boar	Sus scrofa	Mz25	Szczepanki	Poland	bone	Mesolithic			-21.9	5.8	39.1	14.1	3.2	Tomczyk et al 2020	Journal of Archaeological Science: Reports 29 (2020): 102141	https://doi.org/10.1016/j.jasrep.2019.102141
517	Pig/wild boar	Sus sp.	P00/01	Giecz	Poland	bone	Medieval			-20.5	5.8			3.2	Reitsema et al 2010	Journal of Archaeological Science 37 (2010): 1413–1423	https://doi.org/10.1016/j.jas.2010.01.001
518	Pig/wild boar	Sus scrofa		Ostorf	Germany	dentine	Neolithic	4400	34	-22.4	6.9				Olsen et al 2010	Radiocarbon 52:2–3 (2010): 635–644	https://doi.org/10.1017/S0033822200045665
519	Pig/wild boar	Sus scrofa		Ostorf	Germany	dentine	Neolithic	4435	36	-21.2	7.2				Olsen et al 2010	Radiocarbon 52:2–3 (2010): 635–644	https://doi.org/10.1017/S0033822200045665
520	Pig/wild boar	Sus scrofa		Ostorf	Germany	dentine	Neolithic	4449	34	-22.1	7.2				Olsen et al 2010	Radiocarbon 52:2–3 (2010): 635–644	https://doi.org/10.1017/S0033822200045665
521	Pig/wild boar	Sus scrofa		Ostorf	Germany	dentine	Neolithic	4387	35	-22.1	6.7				Olsen et al 2010	Radiocarbon 52:2–3 (2010): 635–644	https://doi.org/10.1017/S0033822200045665
522	Pig/wild boar	Sus scrofa		Ostorf	Germany	dentine	Neolithic	4398	34	-20.6	5.6				Olsen et al 2010	Radiocarbon 52:2–3 (2010): 635–644	https://doi.org/10.1017/S0033822200045665
523	Dog	Canis familiaris	VeA19/II	Velikent	Russia	Bone				-19.31	9.93			3.21	Hollund et al. 2010	Journal of Archaeological Science 37 (2010) 2971e3017	https://doi.org/10.1016/j.jas.2010.08.009
524	Dog	Canis familiaris	VeA26/II	Velikent	Russia	Bone				-19.51	9.19			3.14	Hollund et al. 2010	Journal of Archaeological Science 37 (2010) 2971e3024	https://doi.org/10.1016/j.jas.2010.08.009
525	Dog	Canis familiaris	GUsi10849	Tallinn, Town Hall Sq	Estonia	bone	Medieval			-17.9	11.6	43.5	14.3	3.6	Aguraiuja-Lätti et al. 2022	PLoS ONE 17(12): e0279583	https://doi.org/10.1371/journal.pone.0279583
526	Dog	Canis familiaris	GUsi10850	Tallinn, Town Hall Sq	Estonia	bone	Medieval			-18.3	11.7	42.9	14.4	3.5	Aguraiuja-Lätti et al. 2022	PLoS ONE 17(12): e0279583	https://doi.org/10.1371/journal.pone.0279583
527	Dog	Canis sp.	GUsi10851	Tallinn, Town Hall Sq	Estonia	bone	Medieval			-20.6	9.2	43.1	14.2	3.5	Aguraiuja-Lätti et al. 2022	PLoS ONE 17(12): e0279583	https://doi.org/10.1371/journal.pone.0279583
528	Dog	Canis familiaris	KIA-55250	Rebala (stone-cist graves)	Estonia	bone	Iron Age (Roman Iron Age)	1811	24	-20.8	10.1	40	14.9	3.1	Aguraiuja-Lätti et al. 2022	PLoS ONE 17(12): e0279583	https://doi.org/10.1371/journal.pone.0279583
529	Dog	Canis familiaris	GUsi10817	Rakvere, Pikk St	Estonia	bone	Early Modern			-20.3	9.3	42.1	14.4	3.4	Aguraiuja-Lätti et al. 2022	PLoS ONE 17(12): e0279583	https://doi.org/10.1371/journal.pone.0279583
530	Dog	Canis familiaris	KIA-55052	Soontagana hill fort	Estonia	bone	Iron Age (Viking Age/Late Iron Age)	990	30	-18.9	9.5	41.1	15.3	3.1	Aguraiuja-Lätti et al. 2022	PLoS ONE 17(12): e0279583	https://doi.org/10.1371/journal.pone.0279583
531	Dog	Canis familiaris	GUsi10845	Sargvere (settlement)	Estonia	bone	Medieval			-20.3	10.7	40.6	14.1	3.4	Aguraiuja-Lätti et al. 2022	PLoS ONE 17(12): e0279583	https://doi.org/10.1371/journal.pone.0279583
532	Dog	Canis familiaris	GUsi10846	Sargvere (settlement)	Estonia	bone	Medieval			-20.2	8.2	43.3	14.8	3.4	Aguraiuja-Lätti et al. 2022	PLoS ONE 17(12): e0279583	https://doi.org/10.1371/journal.pone.0279583
533	Dog	Canis familiaris	GUsi10852	Otepää hill fort	Estonia	bone	Iron Age (Pre-Viking/Viking/Late Iron Age)			-21.3	8.8	43.4	14.5	3.5	Aguraiuja-Lätti et al. 2022	PLoS ONE 17(12): e0279583	https://doi.org/10.1371/journal.pone.0279583
534	Dog	Canis familiaris	GUsi10853	Otepää hill fort	Estonia	bone	Iron Age (Pre-Viking/Viking/Late Iron Age)			-21	9.3	43.4	14.5	3.5	Aguraiuja-Lätti et al. 2022	PLoS ONE 17(12): e0279583	https://doi.org/10.1371/journal.pone.0279583
535	Dog	Canis familiaris	GUsi10854	Otepää hill fort	Estonia	bone	Iron Age (Pre-Viking/Viking/Late Iron Age)			-20.9	10.9	43.4	14	3.6	Aguraiuja-Lätti et al. 2022	PLoS ONE 17(12): e0279583	https://doi.org/10.1371/journal.pone.0279583
536	Dog	Canis familiaris	GUsi10227	Tartu, Jakobi St 2	Estonia	bone	Medieval			-21.3	11.5	43.1	15.1	3.3	Aguraiuja-Lätti et al. 2022	PLoS ONE 17(12): e0279583	https://doi.org/10.1371/journal.pone.0279583
537	Dog	Canis familiaris	GUsi10232	Tartu, Lutsu St 12	Estonia	bone	Medieval			-20.9	11	43	15	3.3	Aguraiuja-Lätti et al. 2022	PLoS ONE 17(12): e0279583	https://doi.org/10.1371/journal.pone.0279583
538	Dog	Canis familiaris	GUsi10239	Viljandi, Pikk St 4	Estonia	bone	Medieval			-20.6	10.7	42.1	15	3.3	Aguraiuja-Lätti et al. 2022	PLoS ONE 17(12): e0279583	https://doi.org/10.1371/journal.pone.0279583
539	Dog	Canis familiaris	GUsi10481	Viljandi, Vaksali St 4	Estonia	bone	Medieval			-19.8	10.3	42	14.6	3.3	Aguraiuja-Lätti et al. 2022	PLoS ONE 17(12): e0279583	https://doi.org/10.1371/journal.pone.0279583
540	Dog	Canis familiaris	1734BCE	Norsminde	Denmark	bone				-10.3	12.2			3.14	Craig et al 2006	Journal of Archaeological Science 33 (2006): 1642–1646	https://doi.org/10.1016/j.jas.2006.05.006
541	Dog	Canis familiaris	1734NAK	Norsminde	Denmark	bone	Late Mesolithic Ertebølle			-10.3	13.3			3.11	Craig et al 2006	Journal of Archaeological Science 33 (2006): 1642–1646	https://doi.org/10.1016/j.jas.2006.05.006
542	Dog	Canis familiaris	1734NKJ	Norsminde	Denmark	bone	Late Mesolithic Ertebølle			-10	12.7			3.22	Craig et al 2006	Journal of Archaeological Science 33 (2006): 1642–1646	https://doi.org/10.1016/j.jas.2006.05.006
543	Dog	Canis familiaris	1734PEZ	Norsminde	Denmark	bone	Late Mesolithic Ertebølle			-11.2	12.6			3.19	Craig et al 2006	Journal of Archaeological Science 33 (2006): 1642–1646	https://doi.org/10.1016/j.jas.2006.05.006
544	Dog	Canis familiaris	1734TFE	Norsminde	Denmark	bone	Late Mesolithic Ertebølle			-8.7	14.1			3.17	Craig et al 2006	Journal of Archaeological Science 33 (2006): 1642–1646	https://doi.org/10.1016/j.jas.2006.05.006
545	Dog	Canis familiaris	1734YAQ	Norsminde	Denmark	bone	Late Mesolithic Ertebølle			-11.3	12.4			3.19	Craig et al 2006	Journal of Archaeological Science 33 (2006): 1642–1646	https://doi.org/10.1016/j.jas.2006.05.006
546	Dog	Canis familiaris	2911AADY	Bjørnsholm	Denmark	bone				-17.2	8.1			3.08	Craig et al 2006	Journal of Archaeological Science 33 (2006): 1642–1646	https://doi.org/10.1016/j.jas.2006.05.006
547	Dog	Canis familiaris	2911AEEE	Bjørnsholm	Denmark	bone	Early Neolithic Funnel Beaker			-10.4	13.8			3.18	Craig et al 2006	Journal of Archaeological Science 33 (2006): 1642–1646	https://doi.org/10.1016/j.jas.2006.05.006
548	Dog	Canis familiaris	2911HFY	Bjørnsholm	Denmark	bone	Late Mesolithic Ertebølle			-10.4	11.4			3.24	Craig et al 2006	Journal of Archaeological Science 33 (2006): 1642–1646	https://doi.org/10.1016/j.jas.2006.05.006
549	Dog	Canis familiaris	2911VYT	Bjørnsholm	Denmark	bone	Late Mesolithic Ertebølle			-18.3	8.9			3.18	Craig et al 2006	Journal of Archaeological Science 33 (2006): 1642–1646	https://doi.org/10.1016/j.jas.2006.05.006
550	Dog	Canis familiaris	AAR-4092	Carstensminde	Denmark	bone		7280	45	-13.8	13			3.3	Fischer et al 2007	Journal of Archaeological Science 34 (2007): 2125–2150	https://doi.org/10.1016/j.jas.2007.02.028
551	Dog	Canis familiaris	AAR-4381/M-56696	Holmegård I	Denmark	bone		7980	70	-18.3	9.5			3.2	Fischer et al 2007	Journal of Archaeological Science 34 (2007): 2125–2150	https://doi.org/10.1016/j.jas.2007.02.028
552	Dog	Canis familiaris	AAR-4382/M-56697	Holmegård V	Denmark	bone		8580	60	-17.8	8.8			3.1	Fischer et al 2007	Journal of Archaeological Science 34 (2007): 2125–2150	https://doi.org/10.1016/j.jas.2007.02.028
553	Dog	Canis familiaris	AAR-4766/30053	Bodal C	Denmark	bone		5355	45	-15.1	10.2			3.2	Fischer et al 2007	Journal of Archaeological Science 34 (2007): 2125–2150	https://doi.org/10.1016/j.jas.2007.02.028
554	Dog	Canis familiaris	AAR-4767	Bodal AL	Denmark	bone	(Kongemose)	5765	45	-13.8	10.1			3.2	Fischer et al 2007	Journal of Archaeological Science 34 (2007): 2125–2150	https://doi.org/10.1016/j.jas.2007.02.028
555	Dog	Canis familiaris	AAR-4767/32176	Bodal AL	Denmark	bone		5765	45	-13.5	10			3.2	Fischer et al 2007	Journal of Archaeological Science 34 (2007): 2125–2150	https://doi.org/10.1016/j.jas.2007.02.028
556	Dog	Canis familiaris	AAR-4769/30035	Bodal A	Denmark	bone		5380	50	-19.3	9.7			3.2	Fischer et al 2007	Journal of Archaeological Science 34 (2007): 2125–2150	https://doi.org/10.1016/j.jas.2007.02.028
557	Dog	Canis familiaris	AAR-4770/ZMK 43/1988	Bodal E	Denmark	bone		5340	80	-20.1	7.9			3.4	Fischer et al 2007	Journal of Archaeological Science 34 (2007): 2125–2150	https://doi.org/10.1016/j.jas.2007.02.028
558	Dog	Canis familiaris	AAR-4771/32175	Bodal AV	Denmark	bone		5250	50	-23.6	9.3			3.1	Fischer et al 2007	Journal of Archaeological Science 34 (2007): 2125–2150	https://doi.org/10.1016/j.jas.2007.02.028
559	Dog	Canis familiaris	AAR-4772/31020	Bodal K	Denmark	bone		5240	45	-24.4	7.6			3.4	Fischer et al 2007	Journal of Archaeological Science 34 (2007): 2125–2150	https://doi.org/10.1016/j.jas.2007.02.028
560	Dog	Canis familiaris	AAR-4773/BCH198: 49a+b	Undløse Bro	Denmark	bone		5386	42	-19.7	10			3.4	Fischer et al 2007	Journal of Archaeological Science 34 (2007): 2125–2150	https://doi.org/10.1016/j.jas.2007.02.028
561	Dog	Canis familiaris	AAR-7194/36614	Bodal K	Denmark	bone		5209	41	-22.4	9.2			3.1	Fischer et al 2007	Journal of Archaeological Science 34 (2007): 2125–2150	https://doi.org/10.1016/j.jas.2007.02.028
562	Dog	Canis familiaris	AAR-7195/31176	Kongemose B	Denmark	bone		4690	41	-20.3	9.2			3.1	Fischer et al 2007	Journal of Archaeological Science 34 (2007): 2125–2150	https://doi.org/10.1016/j.jas.2007.02.028
563	Dog	Canis familiaris	AAR-7199/34768	Bodal C	Denmark	bone		5430	48	-14.5	10.4			3.1	Fischer et al 2007	Journal of Archaeological Science 34 (2007): 2125–2150	https://doi.org/10.1016/j.jas.2007.02.028
564	Dog	Canis familiaris	K-3773/AFP1	Præstelyng	Denmark	bone		5260	65	-21.3	8.5			3.2	Fischer et al 2007	Journal of Archaeological Science 34 (2007): 2125–2150	https://doi.org/10.1016/j.jas.2007.02.028
565	Dog	Canis familiaris	K-4133/M57431	Ringkloster	Denmark	bone		5420	210	-16.6	16.2			3.4	Fischer et al 2007	Journal of Archaeological Science 34 (2007): 2125–2150	https://doi.org/10.1016/j.jas.2007.02.028
566	Dog	Canis familiaris	AAR-7673/ZMK 15/1985	Ulkestrup Lyng M	Denmark	bone		4680	48	-22.7	8.3			3.2	Fischer et al 2007	Journal of Archaeological Science 34 (2007): 2125–2150	https://doi.org/10.1016/j.jas.2007.02.028
567	Dog	Canis familiaris	ZMK 112/1956	Argus	Denmark	bone	Mesolithic or neolithic			-14.3	11.3			3.4	Fischer et al 2007	Journal of Archaeological Science 34 (2007): 2125–2150	https://doi.org/10.1016/j.jas.2007.02.028
568	Dog	Canis familiaris/Capreolus capreolus	AAR-4093	Argus	Denmark	bone		6870	50	-20.1	6.6			3.2	Fischer et al 2007	Journal of Archaeological Science 34 (2007): 2125–2150	https://doi.org/10.1016/j.jas.2007.02.028
569	Dog	Canis familiaris	1734RFK	Norsminde	Denmark	dentine	Late Mesolithic Ertebølle			-10.5	13.5			3.17	Craig et al 2006	Journal of Archaeological Science 33 (2006): 1642–1646	https://doi.org/10.1016/j.jas.2006.05.006
570	Dog	Canis familiaris	51	Šventoji 6	Lithuania	bone	Late neolithic			-20.7	13.3			3.4	Antanaitis-Jacobs et al 2009	Archaeologia Baltica 12 (2019): 12–30
571	Dog	Canis familiaris	54	Šventoji 23	Lithuania	bone	Late neolithic			-19.2	12.8			3.6	Antanaitis-Jacobs et al 2009	Archaeologia Baltica 12 (2019): 12–30
572	Dog	Canis familiaris		Šventoji 6	Lithuania	bone	Subneolithic			-20.3	13.2	43	15.4	3.3	Piličiauskas et al 2017b	Archaeological and Anthropological Sciences 9:7 (2017): 1421–1437	https://doi.org/10.1007/s12520-017-0463-z
573	Dog	Canis lupus familiaris	ŽPVR 29	The lower castle of Vilnius and The Palace of the Grand Dukes of Lithuania; Vilnius	Lithuania	bone	16–17th C AD			-20.1	9.1	40.1	14.3	3.3	Simčenka et al 2020	Archaeological and Anthropological Sciences 12 (2020): 1–14	https://doi.org/10.1007/s12520-020-01063-9
574	Dog	Canis lupus familiaris	ŽPVR 30	The lower castle of Vilnius and The Palace of the Grand Dukes of Lithuania; Vilnius	Lithuania	bone	16–17th C AD			-20.5	11.5	39.2	14.2	3.2	Simčenka et al 2020	Archaeological and Anthropological Sciences 12 (2020): 1–14	https://doi.org/10.1007/s12520-020-01063-9
575	Dog	Canis familiaris	AGE07	Ageröd I Munkarp Skåne	Sweden	bone	Neolithic early Atlantic			-16.7	10.1			3.5	Lidén et al 2004	Antiquity 78: 299 (2004): 23–33	https://doi.org/10.1017/S0003598X00092899
576	Dog	Canis familiaris	AGE10	Ageröd I Munkarp Skåne	Sweden	bone	Neolithic early Atlantic			-17	13.1			3.4	Lidén et al 2004	Antiquity 78: 299 (2004): 23–33	https://doi.org/10.1017/S0003598X00092899
577	Dog	Canis familiaris	KOP106	Köpingsvik Öland	Sweden	bone				-14.8	14.5	34.2	13.3	3	Eriksson et al 2008	Journal of Anthropological Archaeology 27 (2008): 520–543	https://doi.org/10.1016/j.jaa.2008.08.004
578	Dog	Canis familiaris	KOP107	Köpingsvik Öland	Sweden	bone				-14.2	14.7	40.7	14.8	3.2	Eriksson et al 2008	Journal of Anthropological Archaeology 27 (2008): 520–543	https://doi.org/10.1016/j.jaa.2008.08.004
579	Dog	Canis familiaris	KOP108	Köpingsvik Öland	Sweden	bone				-14.9	14.4	39.3	15.7	2.9	Eriksson et al 2008	Journal of Anthropological Archaeology 27 (2008): 520–543	https://doi.org/10.1016/j.jaa.2008.08.004
580	Dog	Canis familiaris	KOP109	Köpingsvik Öland	Sweden	bone				-14.4	14			3	Eriksson et al 2008	Journal of Anthropological Archaeology 27 (2008): 520–543	https://doi.org/10.1016/j.jaa.2008.08.004
581	Dog	Canis familiaris	KOP145	Köpingsvik Öland	Sweden	bone				-14.7	14.7			3.1	Eriksson et al 2008	Journal of Anthropological Archaeology 27 (2008): 520–543	https://doi.org/10.1016/j.jaa.2008.08.004
582	Dog	Canis familiaris	KOP171	Köpingsvik Öland	Sweden	bone				-14.9	14.2			3	Eriksson et al 2008	Journal of Anthropological Archaeology 27 (2008): 520–543	https://doi.org/10.1016/j.jaa.2008.08.004
583	Dog	Canis familiaris	KOP172	Köpingsvik Öland	Sweden	bone				-14.2	14.5			3.2	Eriksson et al 2008	Journal of Anthropological Archaeology 27 (2008): 520–543	https://doi.org/10.1016/j.jaa.2008.08.004
584	Dog	Canis familiaris	KOP173	Köpingsvik Öland	Sweden	bone				-14.8	14.9			3.1	Eriksson et al 2008	Journal of Anthropological Archaeology 27 (2008): 520–543	https://doi.org/10.1016/j.jaa.2008.08.004
585	Dog	Canis familiaris	KOP178	Köpingsvik Öland	Sweden	bone				-14.7	15			3.2	Eriksson et al 2008	Journal of Anthropological Archaeology 27 (2008): 520–543	https://doi.org/10.1016/j.jaa.2008.08.004
586	Dog	Canis familiaris	KOR36	Korsnäs; Grödinge RAÄ447	Sweden	bone	Neolithic Pitted ware			-15.1	13.8			3.2	Fornander et al 2008	Journal of Anthropological Archaeology 27 (2008): 281–297	https://doi.org/10.1016/j.jaa.2008.03.004
587	Dog	Canis familiaris	KOR37	Korsnäs; Grödinge RAÄ447	Sweden	bone	Neolithic Pitted ware	4380	45	-13.7	14.1			3.2	Fornander et al 2008	Journal of Anthropological Archaeology 27 (2008): 281–297	https://doi.org/10.1016/j.jaa.2008.03.004
588	Dog	Canis familiaris	KOR38	Korsnäs; Grödinge RAÄ447	Sweden	bone	Neolithic Pitted ware			-15.2	12.8			3.3	Fornander et al 2008	Journal of Anthropological Archaeology 27 (2008): 281–297	https://doi.org/10.1016/j.jaa.2008.03.004
589	Dog	Canis familiaris	KOR39	Korsnäs; Grödinge RAÄ447	Sweden	bone	Neolithic Pitted ware			-15.5	14.5			3.5	Fornander et al 2008	Journal of Anthropological Archaeology 27 (2008): 281–297	https://doi.org/10.1016/j.jaa.2008.03.004
590	Dog	Canis familiaris	RES129	Resmo Öland	Sweden	bone				-20.6	7.5			3.3	Eriksson et al 2008	Journal of Anthropological Archaeology 27 (2008): 520–543	https://doi.org/10.1016/j.jaa.2008.08.004
591	Dog	Canis familiaris	RES160	Resmo Öland	Sweden	bone				-20.2	9.7	42.3	15.5	3.2	Eriksson et al 2008	Journal of Anthropological Archaeology 27 (2008): 520–543	https://doi.org/10.1016/j.jaa.2008.08.004
592	Dog	Canis familiaris	SMÖ 003	Smörkullen; Västra Tollstad; Alvastra Östergotland	Sweden	bone	Roman Iron Age 375-400 AD			-20.6	8.8			3.2	Lindberg 2009	Lindberg T Masters thesis 2009
593	Dog	Canis familiaris	SMÖ 013	Smörkullen; Västra Tollstad; Alvastra Östergotland	Sweden	bone	Roman Iron Age 375-400 AD			-20.4	11.9			3.2	Lindberg 2009	Lindberg T Masters thesis 2009
594	Dog	Canis familiaris	TOR33	Torsborg Öland	Sweden	bone				-19.9	8.7	38.9	15.7	2.9	Eriksson et al 2008	Journal of Anthropological Archaeology 27 (2008): 520–543	https://doi.org/10.1016/j.jaa.2008.08.004
595	Dog	Canis familiaris	VÄS100	Västerbjers Gotland	Sweden	bone	Neolithic Pitted ware			-12	12.7			3.2	Eriksson 2003	Eriksson G Doctoral dissertation 2003
596	Dog	Canis familiaris	VÄS101	Västerbjers Gotland	Sweden	bone	Neolithic Pitted ware			-15.8	13.8			3.1	Eriksson 2003	Eriksson G Doctoral dissertation 2003
597	Dog	Canis familiaris	VÄS102	Västerbjers Gotland	Sweden	bone	Neolithic Pitted ware			-14.6	13.9			3.2	Eriksson 2003	Eriksson G Doctoral dissertation 2003
598	Dog	Canis familiaris	VÄS111	Västerbjers Gotland	Sweden	bone	Neolithic Pitted ware			-14.2	13.8			3.3	Eriksson 2003	Eriksson G Doctoral dissertation 2003
599	Dog	Canis familiaris	VÄS119	Västerbjers Gotland	Sweden	bone	Neolithic Pitted ware			-14.3	13.8			3.3	Eriksson 2003	Eriksson G Doctoral dissertation 2003
600	Dog	Canis familiaris	VÄS120	Västerbjers Gotland	Sweden	bone	Neolithic Pitted ware			-14.5	13.9			3.3	Eriksson 2003	Eriksson G Doctoral dissertation 2003
601	Dog	Canis familiaris	VÄS121	Västerbjers Gotland	Sweden	bone	Neolithic Pitted ware			-14.2	12.5			3.3	Eriksson 2003	Eriksson G Doctoral dissertation 2003
602	Dog	Canis familiaris	VÄS132	Västerbjers Gotland	Sweden	bone	Neolithic Pitted ware			-14.5	12.4			3.3	Eriksson 2003	Eriksson G Doctoral dissertation 2003
603	Dog	Canis familiaris	VÄS133	Västerbjers Gotland	Sweden	bone	Neolithic Pitted ware			-14.4	13.9			3.3	Eriksson 2003	Eriksson G Doctoral dissertation 2003
604	Dog	Canis familiaris	VÄS135	Västerbjers Gotland	Sweden	bone	Neolithic Pitted ware			-14.8	14			3.4	Eriksson 2003	Eriksson G Doctoral dissertation 2003
605	Dog	Canis familiaris	VÄS139	Västerbjers Gotland	Sweden	bone	Neolithic Pitted ware			-14.5	14			3.3	Eriksson 2003	Eriksson G Doctoral dissertation 2003
606	Dog	Canis familiaris	VÄS141	Västerbjers Gotland	Sweden	bone	Neolithic Pitted ware			-15.9	13.4			3.5	Eriksson 2003	Eriksson G Doctoral dissertation 2003
607	Dog	Canis familiaris	VÄS142	Västerbjers Gotland	Sweden	bone	Neolithic Pitted ware			-14.7	13.9			3.3	Eriksson 2003	Eriksson G Doctoral dissertation 2003
608	Dog	Canis familiaris	Karleby 63:85	Karleby Logården	Sweden	bone	MN A	4406	40	-20.4	8.7			3.16	Sjögren 2017	Journal of Archaeological Science: Reports 12 (2017): 295–306	https://doi.org/10.1016/j.jasrep.2017.01.044
609	Dog	Canis familiaris	Karleby 63:86	Karleby Logården	Sweden	bone	MN A	4431	38	-20.5	9.2			3.2	Sjögren 2017	Journal of Archaeological Science: Reports 12 (2017): 295–306	https://doi.org/10.1016/j.jasrep.2017.01.044
610	Dog	Canis familiaris	Karleby 63:87	Karleby Logården	Sweden	bone	MN A	4581	42	-20.9	8.1			3.17	Sjögren 2017	Journal of Archaeological Science: Reports 12 (2017): 295–306	https://doi.org/10.1016/j.jasrep.2017.01.044
611	Dog	Canis familiaris	ALM77	Alvastra dolmen	Sweden	bone				-20.4	7.5	42.2	15.6	3.2	Fornander 2011	Current Swedish Archaeology 19 (2011): 113–141	https://doi.org/10.37718/CSA.2011.09
612	Dog	Canis familiaris	ALM75	Alvastra dolmen	Sweden	bone				-19.3	8.3	44.8	16.1	3.3	Fornander 2011	Current Swedish Archaeology 19 (2011): 113–141	https://doi.org/10.37718/CSA.2011.09
613	Dog	Canis familiaris	DBV 26 r nr 5 Db. 2762	Gråbrodern 4 Visby Gotland	Sweden		Medieval			-18.8	13.3	44.2	15.6	3.3	Lindkvist 2007 thesis	Lindkvist 2007 Master´s Thesis
614	Dog	Canis familiaris	DBV 27 r.nr 6	Gråbrodern 4 Visby Gotland	Sweden		Medieval			-18.9	11.5	44.3	15.4	3.4	Lindkvist 2007 thesis	Lindkvist 2007 Master´s Thesis
615	Dog	Canis familiaris	33	Tågerup 1:1	Sweden	bone	MM			-19.7	11.3	42.1	15	3.277	Boethius & Ahlström 2018	Journal of Archaeological Science 93 (2018): 196–210	https://doi.org/10.1016/j.jas.2018.02.018
616	Dog	Canis familiaris	170	Almeö 96 b	Sweden	bone	EM			-19.6	9.2	43.9	15.1	3.4	Boethius & Ahlström 2018	Journal of Archaeological Science 93 (2018): 196–210	https://doi.org/10.1016/j.jas.2018.02.018
617	Dog	Canis familiaris	MOT 008	Motala Strandvägen	Sweden	bone	Mesolithic			-20.8	10.8	42.6	15.4	3.2	Eriksson et al 2018	Journal of Archaeological Science: Reports 17 (2018): 904–918	https://doi.org/10.1016/j.jasrep.2016.05.052
618	Dog	Canis familiaris	MOT 037	Motala Strandvägen	Sweden	bone	Mesolithic	6406	42	-17.2	11.3	42.5	14.4	3.4	Eriksson et al 2018	Journal of Archaeological Science: Reports 17 (2018): 904–918	https://doi.org/10.1016/j.jasrep.2016.05.052
619	Dog	Canis familiaris	MOT 099	Motala Strandvägen	Sweden	bone	Mesolithic			-22.6	11	35	12.5	3.3	Eriksson et al 2018	Journal of Archaeological Science: Reports 17 (2018): 904–918	https://doi.org/10.1016/j.jasrep.2016.05.052
620	Dog	Canis familiaris	MOT 110	Motala Strandvägen	Sweden	dentine	Mesolithic			-20.6	12.5	32.2	11.5	3.3	Eriksson et al 2018	Journal of Archaeological Science: Reports 17 (2018): 904–918	https://doi.org/10.1016/j.jasrep.2016.05.052
621	Dog	Canis familiaris	KOP170	Köpingsvik Öland	Sweden	dentine				-14.4	15.6			3	Eriksson et al 2008	Journal of Anthropological Archaeology 27 (2008): 520–543	https://doi.org/10.1016/j.jaa.2008.08.004
622	Dog	Canis familiaris		Flakstad; Lofoten archipelago	Norway	dentine	Viking Age			-14.2	18.1	40.1	14.9	3.1	Naumann et al 2014a	Journal of Archaeological Science 41 (2014): 533–540	https://doi.org/10.1016/j.jas.2013.08.022
623	Dog	Canis familiaris	RES147	Resmo Öland	Sweden	dentine				-13.8	14.5	43.1	15.8	3.2	Eriksson et al 2008	Journal of Anthropological Archaeology 27 (2008): 520–543	https://doi.org/10.1016/j.jaa.2008.08.004
624	Dog	Canis familiaris	RES154	Resmo Öland	Sweden	dentine				-19.2	13.1	42.6	15.6	3.2	Eriksson et al 2008	Journal of Anthropological Archaeology 27 (2008): 520–543	https://doi.org/10.1016/j.jaa.2008.08.004
625	Dog	Canis familiaris	RES155	Resmo Öland	Sweden	dentine				-13.7	14.4	42.5	15.9	3.1	Eriksson et al 2008	Journal of Anthropological Archaeology 27 (2008): 520–543	https://doi.org/10.1016/j.jaa.2008.08.004
626	Dog	Canis familiaris	TOR030	Torsborg Öland	Sweden	dentine		2500	40	-19.7	10.9	40.8	15.9	3	Linderholm et al 2014	Internet Archaeology 37 (2014)	https://doi.org/10.11141/ia.37.9
627	Dog	Canis familiaris	TOR30	Torsborg Öland	Sweden	dentine				-19.7	10.9			3	Eriksson et al 2008	Journal of Anthropological Archaeology 27 (2008): 520–543	https://doi.org/10.1016/j.jaa.2008.08.004
628	Dog	Canis familiaris	VÄS131	Västerbjers Gotland	Sweden	dentine	Neolithic Pitted ware			-15.3	15.1			3.3	Eriksson 2003	Eriksson G Doctoral dissertation 2003
629	Dog	Canis familiaris	VÄS134	Västerbjers Gotland	Sweden	dentine	Neolithic Pitted ware			-14.6	15.3			3.4	Eriksson 2003	Eriksson G Doctoral dissertation 2003
630	Dog	Canis familiaris	VÄS143	Västerbjers Gotland	Sweden	dentine	Neolithic Pitted ware			-14.5	15.3			3.2	Eriksson 2003	Eriksson G Doctoral dissertation 2003
631	Dog	Canis familiaris	Karleby 63:84	Karleby Logården	Sweden	dentine	MN A	4373	37	-20.2	11			3.19	Sjögren 2017	Journal of Archaeological Science: Reports 12 (2017): 295–306	https://doi.org/10.1016/j.jasrep.2017.01.044
632	Dog	Canis familiaris	VÄS136	Västerbjers Gotland	Sweden	dentine	Neolithic Pitted ware			-15.4	15.7			3.2	Eriksson 2003	Eriksson G Doctoral dissertation 2003
633	Dog	Canis familiaris	VÄS138	Västerbjers Gotland	Sweden	dentine	Neolithic Pitted ware			-13.6	15.8			3.4	Eriksson 2003	Eriksson G Doctoral dissertation 2003
634	Dog	Canis familiaris	VÄS140	Västerbjers Gotland	Sweden	dentine	Neolithic Pitted ware			-14.3	15.3			3.2	Eriksson 2003	Eriksson G Doctoral dissertation 2003
635	Dog	Canis familiaris	ALM78	Alvastra dolmen	Sweden	dentine				-20	9.7	42.8	16	3.1	Fornander 2011	Current Swedish Archaeology 19 (2011): 113–141	https://doi.org/10.37718/CSA.2011.09
636	Dog	Canis familiaris	ALM76	Alvastra dolmen	Sweden	dentine				-19.9	9.3	37.1	13.6	3.2	Fornander 2011	Current Swedish Archaeology 19 (2011): 113–141	https://doi.org/10.37718/CSA.2011.09
637	Dog	Canis familiaris	MOT 035	Motala Strandvägen	Sweden	dentine	Mesolithic	6142	100	-17	13.5			3.5	Eriksson et al 2018	Journal of Archaeological Science: Reports 17 (2018): 904–918	https://doi.org/10.1016/j.jasrep.2016.05.052
638	Dog	Canis familiaris	KOP176	Köpingsvik Öland	Sweden	dentine				-14.3	16.1			3.1	Eriksson et al 2008	Journal of Anthropological Archaeology 27 (2008): 520–543
639	Dog	Canis familiaris		Flakstad; Lofoten archipelago	Norway	bone	Viking Age			-15.2	15.6	40	15	3.1	Naumann et al 2014a	Journal of Archaeological Science 41 (2014): 533–540	https://doi.org/10.1016/j.jas.2013.08.022
640	Dog	Canis familiaris	BEA-2	Karasjok Beajalgŋai	Norway	bone		804	35	-14.6	16.4	39.1	14	3.3	SI: Spangen & Fjellström 2019; AMS: Spangen 2016	SI: Fennoscandia Archaeologica XXXV (2019): 3–17; AMS: Spangen M Doctoral dissertation 2016	SI: http://www.sarks.fi/fa/PDF/FA35_3.pdf; AMS: https://www.diva-portal.org/smash/get/diva2:956539/FULLTEXT01.pdf
641	Dog	Canis familiaris	778-02	Kałdus	Poland	bone	Medieval			-19.7	9.6	36.5	12.9	3.3	Reitsema et al 2017	Journal of Anthropological Archaeology 45 (2017): 38–52	https://doi.org/10.1016/j.jaa.2016.11.001
642	Dog	Canis familiaris	KM 21814:28	Isokyrö Levänluhta (Leväluhta)	Finland	bone		371	26	-19.5	11	41.2	14.8	3.3	SI: Oinonen et al 2020; AMS: Wessman et al EJA 2018	SI: PloS one (2020): 15(4); e0231787; AMS: European Journal of Archaeology (2018): 21(3), 431–454	SI: https://doi.org/10.1371/journal.pone.0231787; AMS: https://doi.org/doi:10.1017/eaa.2017.84
643	Cat/wildcat	Felis catus	27	Sigtuna Humlegården (block 2008)	Sweden	bone	Medieval			-22.1	10.7			3.3	Linderholm & Kjellström 2011	Journal of Archaeological Science 38 (2011): 925–933	https://doi.org/10.1016/j.jas.2010.11.022
644	Cat/wildcat	Felis catus	Felis	Sigtuna	Sweden	bone	Medieval			-22.1	10.7			3.3	Kjellström et al 2009	Journal of Archaeological Science 36 (2009): 2689–2699	https://doi.org/10.1016/j.jas.2009.08.007
645	Cat/wildcat	Felis catus	BER-5	Stavanger cathedral	Norway	bone	before 1125 AD			-17.8	12.3	43.8	15.6	3.3	van der Sluis et al 2016	Journal of Archaeological Science: Reports 9 (2016): 120–133	https://doi.org/10.1016/j.jasrep.2016.06.054
646	Cat/wildcat	Felis catus	BER-5	Stavanger cathedral	Norway	bone	before 1125 AD			-17.9	12.1	42.8	15.5	3.2	van der Sluis et al 2016	Journal of Archaeological Science: Reports 9 (2016): 120–133	https://doi.org/10.1016/j.jasrep.2016.06.054
647	Cat/wildcat	Felis catus	BER-11	Stavanger cathedral	Norway	bone	before 1125 AD			-19.7	9.7	44.2	15.7	3.3	van der Sluis et al 2016	Journal of Archaeological Science: Reports 9 (2016): 120–133	https://doi.org/10.1016/j.jasrep.2016.06.054
648	Cat/wildcat	Felis catus	BER-11	Stavanger cathedral	Norway	bone	before 1125 AD			-19.6	9.7	44	15.6	3.3	van der Sluis et al 2016	Journal of Archaeological Science: Reports 9 (2016): 120–133	https://doi.org/10.1016/j.jasrep.2016.06.054
649	Cat/wildcat	Felis catus	BER-11	Stavanger cathedral	Norway	bone	before 1125 AD			-19.5	9.6	44	15.6	3.3	van der Sluis et al 2016	Journal of Archaeological Science: Reports 9 (2016): 120–133	https://doi.org/10.1016/j.jasrep.2016.06.054
650	Cat/wildcat	Felis catus	BER-11	Stavanger cathedral	Norway	bone	before 1125 AD			-19.5	9.7	44.7	16	3.3	van der Sluis et al 2016	Journal of Archaeological Science: Reports 9 (2016): 120–133	https://doi.org/10.1016/j.jasrep.2016.06.054
651	Cat/wildcat	Felis silvestris	KOP101	Köpingsvik Öland	Sweden	bone				-20	9.4			3.2	Eriksson et al 2008	Journal of Anthropological Archaeology 27 (2008): 520–543	https://doi.org/10.1016/j.jaa.2008.08.004
652	Cat/wildcat	Felis silvestris	DBV 22 Fnr 439	Annexet 2 Visby Gotland	Sweden		Medieval			-18	11.6	45	15.7	3.3	Lindkvist 2007 thesis	Lindkvist 2007 Master´s Thesis
653	Cat/wildcat	Felis silvestris	DBV 23 Fnr 439	Annexet 2 Visby Gotland	Sweden		Medieval			-17.3	12	44	15.2	3.4	Lindkvist 2007 thesis	Lindkvist 2007 Master´s Thesis
654	Cat/wildcat	Felis silvestris	DBV 24 1977-12-07 r. nr 13 Dbne 2635	Gråbrodern 4 Visby Gotland	Sweden		Medieval			-18.7	11.2	44.7	15.7	3.3	Lindkvist 2007 thesis	Lindkvist 2007 Master´s Thesis
655	Cat/wildcat	Felis silvestris	DBV 25 1977-12-07 r. nr 13 Dbne 2636	Gråbrodern 4 Visby Gotland	Sweden		Medieval			-18.1	11.3	45.9	15.9	3.4	Lindkvist 2007 thesis	Lindkvist 2007 Master´s Thesis
656	Hare	Lepus sp.	GUsi10816	Rakvere, Pikk St	Estonia	bone	Early Modern			-22.2	3.4	38.5	13.1	3.4	Aguraiuja-Lätti et al. 2022	PLoS ONE 17(12): e0279583	https://doi.org/10.1371/journal.pone.0279583
657	Hare	Lepus sp.	GUsi10234	Tartu, Lutsu St 12	Estonia	bone	Medieval			-21.2	8.5	44.9	15.5	3.4	Aguraiuja-Lätti et al. 2022	PLoS ONE 17(12): e0279583	https://doi.org/10.1371/journal.pone.0279583
658	Hare	Lepus sp.	GUsi10247	Tartu Dome Church	Estonia	bone	Medieval			-22.5	5.6	45.1	15.1	3.5	Aguraiuja-Lätti et al. 2022	PLoS ONE 17(12): e0279583	https://doi.org/10.1371/journal.pone.0279583
659	Hare	Lepus sp.	GUsi10241	Viljandi, Pikk St 4	Estonia	bone	Medieval			-22.3	6.1	43.5	15.5	3.3	Aguraiuja-Lätti et al. 2022	PLoS ONE 17(12): e0279583	https://doi.org/10.1371/journal.pone.0279583
660	Hare	Lepus sp.	GUsi10243	Viljandi Museum yard	Estonia	bone	Medieval			-23.1	2.8	40	13.3	3.5	Aguraiuja-Lätti et al. 2022	PLoS ONE 17(12): e0279583	https://doi.org/10.1371/journal.pone.0279583
661	Hare	Lepus sp.	GUsi10492	Viljandi Castle	Estonia	bone	Medieval			-23.5	3.4	42	14.6	3.3	Aguraiuja-Lätti et al. 2022	PLoS ONE 17(12): e0279583	https://doi.org/10.1371/journal.pone.0279583
662	Hare	Lepus sp.	GUsi10493	Viljandi Castle	Estonia	bone	Medieval			-23.3	4.4	42.4	14.7	3.4	Aguraiuja-Lätti et al. 2022	PLoS ONE 17(12): e0279583	https://doi.org/10.1371/journal.pone.0279583
663	Hare	Lepus	Ros36D	Rössberga	Sweden	bone	Neolithic			-22.9	2.4			3.4	Linderholm et al 2008a	Antiquity 82 (2008): 446–461	doi:10.1017/S0003598X00096939
664	Hare	Lepus		Björned; Torsåker Ångermanland	Sweden	bone	Late Iron Age			-24.5	1.6			3.2	Linderholm et al 2008b	Fornvännen 103 (2008): 176–189	http://kulturarvsdata.se/raa/fornvannen/2008_176
665	Hare	Lepus	FRG67	Frälsegården passage grave	Sweden	bone	MN A			-23.2	3.6	40.2	14.3	3.3	Hinders 2011	Hinders J 2011 Master´s Thesis
666	Hare	Lepus	FRG68	Frälsegården passage grave	Sweden	bone	MN A			-22.8	2.8	43.9	15.6	3.3	Hinders 2011	Hinders J 2011 Master´s Thesis
667	Hare	Lepus	FRG66	Frälsegården passage grave	Sweden	bone	MN A			-23.1	3.8	44.2	15.5	3.3	Hinders 2011	Hinders J 2011 Master´s Thesis
668	Hare	Lepus	FRG65	Frälsegården passage grave	Sweden	bone	MN A			-22.9	4	42.9	15.1	3.3	Hinders 2011	Hinders J 2011 Master´s Thesis
669	Hare	Lepus	49	Skänninge Östegötland	Sweden		Medieval			-23.4	5.8	43.1	16	3.2	Arcini et al 2012	International Journal of Osteoarchaeology 24 (2012): 543–556	https://doi.org/10.1002/oa.2247
670	Hare	Lepus timidus	KOP105	Köpingsvik Öland	Sweden	bone				-21.6	3.3			3.2	Eriksson et al 2008	Journal of Anthropological Archaeology 27 (2008): 520–543	https://doi.org/10.1016/j.jaa.2008.08.004
671	Hare	Lepus timidus	KOP114	Köpingsvik Öland	Sweden	bone				-21.2	2.2			3.3	Eriksson et al 2008	Journal of Anthropological Archaeology 27 (2008): 520–543	https://doi.org/10.1016/j.jaa.2008.08.004
672	Hare	Lepus timidus	RES146	Resmo Öland	Sweden	bone				-20.1	6.3	42.3	15.6	3.2	Linderholm et al 2014	Internet Archaeology 37 (2014)	https://doi.org/10.11141/ia.37.9
673	Hare	Lepus timidus	KOP148	Köpingsvik Öland	Sweden	bone				-20.1	6.3			3.2	Eriksson et al 2008	Journal of Anthropological Archaeology 27 (2008): 520–543	https://doi.org/10.1016/j.jaa.2008.08.004
674	Hare	Lepus timidus	KOP184	Köpingsvik Öland	Sweden	bone				-22.4	6.2			3.2	Eriksson et al 2008	Journal of Anthropological Archaeology 27 (2008): 520–543	https://doi.org/10.1016/j.jaa.2008.08.004
675	Hare	Lepus timidus	KOR32	Korsnäs; Grödinge RAÄ447	Sweden	bone	Neolithic Pitted ware			-22	2.2			3.2	Fornander et al 2008	Journal of Anthropological Archaeology 27 (2008): 281–297	https://doi.org/10.1016/j.jaa.2008.03.004
676	Hare	Lepus timidus	KOR33	Korsnäs; Grödinge RAÄ447	Sweden	bone	Neolithic Pitted ware			-20.7	2.4			3.2	Fornander et al 2008	Journal of Anthropological Archaeology 27 (2008): 281–297	https://doi.org/10.1016/j.jaa.2008.03.004
677	Hare	Lepus timidus	RES125	Resmo Öland	Sweden	bone				-21.2	4.9			3.2	Eriksson et al 2008	Journal of Anthropological Archaeology 27 (2008): 520–543	https://doi.org/10.1016/j.jaa.2008.08.004
678	Hare	Lepus timidus	RES161	Resmo Öland	Sweden	bone				-20.7	7.2	42.9	15.5	3.3	Eriksson et al 2008	Journal of Anthropological Archaeology 27 (2008): 520–543	https://doi.org/10.1016/j.jaa.2008.08.004
679	Hare	Lepus timidus	RES162	Resmo Öland	Sweden	bone				-20.8	3.4	42.6	15.7	3	Eriksson et al 2008	Journal of Anthropological Archaeology 27 (2008): 520–543	https://doi.org/10.1016/j.jaa.2008.08.004
680	Hare	Lepus timidus	VÄS130	Västerbjers Gotland	Sweden	bone	Neolithic Pitted ware			-22.5	2.6			3.4	Eriksson 2003	Eriksson G Doctoral dissertation 2003
681	Hare	Lepus timidus	148	Balltorp	Sweden	bone	EM			-21	7.1	43.2	14.5	3.471	Boethius & Ahlström 2018	Journal of Archaeological Science 93 (2018): 196–210	https://doi.org/10.1016/j.jas.2018.02.018
682	Hare	Lepus europaeus	207-98	Kałdus	Poland	bone	Medieval			-21.7	5	36.6	12.9	3.3	Reitsema et al 2017	Journal of Anthropological Archaeology 45 (2017): 38–52	https://doi.org/10.1016/j.jaa.2016.11.001
683	Hare	Lepus timidus	OKAJA-4-H	Oulu Kajaaninkatu	Finland	bone	Preindustrial			-22.4	1.6	44.58	14.86	3.5	Lahtinen & Salmi 2018	Environmental Archaeology 24:1 (2018): 1–14	https://doi.org/10.1080/14614103.2018.1444695
684	Hare	Lepus timidus	OPIK-4-H	Oulu Pikisaari	Finland	bone	Preindustrial			-22.8	3	42.19	15.25	3.2	Lahtinen & Salmi 2018	Environmental Archaeology 24:1 (2018): 1–14	https://doi.org/10.1080/14614103.2018.1444695
685	Moose	Alces alces	43	Šventoji 2B	Lithuania	bone	Middle neolithic			-23.6	4.9			3.3	Antanaitis-Jacobs et al 2009	Archaeologia Baltica 12 (2019): 12–30
686	Moose	Alces alces		Šventoji 43	Lithuania	bone	Subneolithic			-23.5	4.4	37.4	13.1	3.3	Piličiauskas et al 2017b	Archaeological and Anthropological Sciences 9:7 (2017): 1421–1437	https://doi.org/10.1007/s12520-017-0463-z
687	Moose	Alces alces		Žemaitiškė 2	Lithuania	bone	Subneolithic			-22.9	4.1	44.3	15.9	3.3	Piličiauskas et al 2017a	Journal of Archaological Science: Reports 14 (2017): 530–542	https://doi.org/10.1016/j.jasrep.2017.06.004
688	Moose	Alces alces		Žemaitiškė 2	Lithuania	bone	Subneolithic			-23.1	4.1	45.1	15.9	3.3	Piličiauskas et al 2017a	Journal of Archaological Science: Reports 14 (2017): 530–542	https://doi.org/10.1016/j.jasrep.2017.06.004
689	Moose	Alces alces	57	Šventoji 1B	Lithuania	bone	Middle/Late neolithic			-23.1	3.6			3.4	Antanaitis-Jacobs et al 2009	Archaeologia Baltica 12 (2019): 12–30
690	Moose	Alces alces	ŽPVR 25	The lower castle of Vilnius and The Palace of the Grand Dukes of Lithuania; Vilnius	Lithuania	bone	16–17th C AD			-22.1	4.3	34.1	12	3.3	Simčenka et al 2020	Archaeological and Anthropological Sciences 12 (2020): 1–14	https://doi.org/10.1007/s12520-020-01063-9
691	Moose	Alces alces	ŽPVR 26	The lower castle of Vilnius and The Palace of the Grand Dukes of Lithuania; Vilnius	Lithuania	bone	16–17th C AD			-22.2	2.9	40.5	14.4	3.3	Simčenka et al 2020	Archaeological and Anthropological Sciences 12 (2020): 1–14	https://doi.org/10.1007/s12520-020-01063-9
692	Moose	Alces alces	ŽPVR 37	The lower castle of Vilnius and The Palace of the Grand Dukes of Lithuania; Vilnius	Lithuania	bone	16–17th C AD			-22.4	3.4	37.1	13.3	3.2	Simčenka et al 2020	Archaeological and Anthropological Sciences 12 (2020): 1–14	https://doi.org/10.1007/s12520-020-01063-9
693	Moose	Alces alces	77 AP	Lunggard	Denmark	bone	Preboreal	9050	125	-20.3	2	30.2	10.9	3.2	Bocherens et al 2015	PLoS One 10:2 (2015): e0115090	https://doi.org/10.1371/journal.pone.0115090
694	Moose	Alces alces	78 AP	Tved	Denmark	bone	Preboreal	9460	145	-21	2	30	10.7	3.3	Bocherens et al 2015	PLoS One 10:2 (2015): e0115090	https://doi.org/10.1371/journal.pone.0115090
695	Moose	Alces alces	80 AP	Rutsker; Bornholm	Denmark	bone	Preboreal	9720	135	-21.7	3.2	38.7	13.6	3.3	Bocherens et al 2015	PLoS One 10:2 (2015): e0115090	https://doi.org/10.1371/journal.pone.0115090
696	Moose	Alces alces	AGE17	Ageröd I Munkarp Skåne	Sweden	bone	Neolithic early Atlantic			-22.7	5.1			3.4	Lidén et al 2004	Antiquity 78: 299 (2004): 23–33	https://doi.org/10.1017/S0003598X00092899
697	Moose	Alces alces	AGE18	Ageröd I Munkarp Skåne	Sweden	bone	Neolithic early Atlantic			-22.3	2.6			3.3	Lidén et al 2004	Antiquity 78: 299 (2004): 23–33	https://doi.org/10.1017/S0003598X00092899
698	Moose	Alces alces	Elk season 2011	Riņņukalns	Latvia	bone	ca. 3500 cal BC			-23.3	5.2			3.3	Meadows et al 2016	Journal of Archaeological Science: Reports 6 (2016): 678–689	https://doi.org/10.1016/j.jasrep.2015.10.024
699	Moose	Alces alces	Elk season 2011	Riņņukalns	Latvia	bone	ca. 3500 cal BC			-23.1	4.6			3.2	Meadows et al 2016	Journal of Archaeological Science: Reports 6 (2016): 678–689	https://doi.org/10.1016/j.jasrep.2015.10.024
700	Moose	Alces alces	Elk season 2011	Riņņukalns	Latvia	bone	ca. 3500 cal BC			-23.6	4.4			3.3	Meadows et al 2016	Journal of Archaeological Science: Reports 6 (2016): 678–689	https://doi.org/10.1016/j.jasrep.2015.10.024
701	Moose	Alces alces	FJE01	Fröjel	Sweden	antler	Viking Age			-21	2.7			3.1	Schyman 2012	Schyman J Masters thesis 2012
702	Moose	Alces alces	FJE02	Fröjel	Sweden	antler	Viking Age			-22.1	2.7			3	Schyman 2012	Schyman J Masters thesis 2012
703	Moose	Alces alces	FJE04	Fröjel	Sweden	antler	Viking Age			-21.8	3.3			3.1	Schyman 2012	Schyman J Masters thesis 2012
704	Moose	Alces alces	FJE06	Fröjel	Sweden	antler	Viking Age			-22.3	3.1			3.1	Schyman 2012	Schyman J Masters thesis 2012
705	Moose	Alces alces	FJE07	Fröjel	Sweden	antler	Viking Age			-22	3.9			3.1	Schyman 2012	Schyman J Masters thesis 2012
706	Moose	Alces alces	FJE08	Fröjel	Sweden	antler	Viking Age			-21.9	3.9			3	Schyman 2012	Schyman J Masters thesis 2012
707	Moose	Alces alces	FJE09	Fröjel	Sweden	antler	Viking Age			-21.6	3.6			3.3	Schyman 2012	Schyman J Masters thesis 2012
708	Moose	Alces alces	FJE10	Fröjel	Sweden	antler	Viking Age			-22	3.3			3.3	Schyman 2012	Schyman J Masters thesis 2012
709	Moose	Alces alces	FJE14	Fröjel	Sweden	antler	Viking Age			-22.3	2.9			3.6	Schyman 2012	Schyman J Masters thesis 2012
710	Moose	Alces alces	HDS01	Häffinds	Sweden	antler	Viking Age			-22.8	4.6			2.9	Schyman 2012	Schyman J Masters thesis 2012
711	Moose	Alces alces	HDS04	Häffinds	Sweden	antler	Viking Age			-21	2.9			3.1	Schyman 2012	Schyman J Masters thesis 2012
712	Moose	Alces alces	KOP142	Köpingsvik Öland	Sweden	antler				-21.3	4.5			3	Eriksson et al 2008	Journal of Anthropological Archaeology 27 (2008): 520–543	https://doi.org/10.1016/j.jaa.2008.08.004
713	Moose	Alces alces	SNA01	Sigtuna	Sweden	antler	Viking Age			-21.8	2.7			3.2	Schyman 2012	Schyman J Masters thesis 2012
714	Moose	Alces alces	SNA02	Sigtuna	Sweden	antler	Viking Age			-21.3	7			3	Schyman 2012	Schyman J Masters thesis 2012
715	Moose	Alces alces	SNA03	Sigtuna	Sweden	antler	Viking Age			-21.9	3.6			3.1	Schyman 2012	Schyman J Masters thesis 2012
716	Moose	Alces alces	SNA04	Sigtuna	Sweden	antler	Viking Age			-21.9	4.7			3.1	Schyman 2012	Schyman J Masters thesis 2012
717	Moose	Alces alces	SNA05	Sigtuna	Sweden	antler	Viking Age			-21.6	3.2			3.1	Schyman 2012	Schyman J Masters thesis 2012
718	Moose	Alces alces	SNA06	Sigtuna	Sweden	antler	Viking Age			-22.4	2.9			3.1	Schyman 2012	Schyman J Masters thesis 2012
719	Moose	Alces alces	SNA07	Sigtuna	Sweden	antler	Viking Age			-22.1	5.8			3	Schyman 2012	Schyman J Masters thesis 2012
720	Moose	Alces alces	SNA08	Sigtuna	Sweden	antler	Viking Age			-22	4.5			3.1	Schyman 2012	Schyman J Masters thesis 2012
721	Moose	Alces alces	SNA09	Sigtuna	Sweden	antler	Viking Age			-21.3	5.3			3.1	Schyman 2012	Schyman J Masters thesis 2012
722	Moose	Alces alces	SNA10	Sigtuna	Sweden	antler	Viking Age			-21.6	5.6			3.1	Schyman 2012	Schyman J Masters thesis 2012
723	Moose	Alces alces	SNA11	Sigtuna	Sweden	antler	Viking Age			-21.9	6.1			3.2	Schyman 2012	Schyman J Masters thesis 2012
724	Moose	Alces alces	SNA12	Sigtuna	Sweden	antler	Viking Age			-21.3	6.2			3.1	Schyman 2012	Schyman J Masters thesis 2012
725	Moose	Alces alces	SNA13	Sigtuna	Sweden	antler	Viking Age			-21	4.8			3.1	Schyman 2012	Schyman J Masters thesis 2012
726	Moose	Alces alces	SNA14	Sigtuna	Sweden	antler	Viking Age			-21.5	2.7			3.1	Schyman 2012	Schyman J Masters thesis 2012
727	Moose	Alces alces	SNA15	Sigtuna	Sweden	antler	Viking Age			-21.1	5.3			3.1	Schyman 2012	Schyman J Masters thesis 2012
728	Moose	Alces alces	SNA16	Sigtuna	Sweden	antler	Viking Age			-21.8	6.5			3.1	Schyman 2012	Schyman J Masters thesis 2012
729	Moose	Alces alces	SNA17	Sigtuna	Sweden	antler	Viking Age			-22	2.8			3	Schyman 2012	Schyman J Masters thesis 2012
730	Moose	Alces alces	SNA18	Sigtuna	Sweden	antler	Viking Age			-21.2	2.9			3	Schyman 2012	Schyman J Masters thesis 2012
731	Moose	Alces alces	SNA19	Sigtuna	Sweden	antler	Viking Age			-21.7	4.1			3.1	Schyman 2012	Schyman J Masters thesis 2012
732	Moose	Alces alces	VBY02	Visby	Sweden	antler	Viking Age			-21.8	3.1			3.2	Schyman 2012	Schyman J Masters thesis 2012
733	Moose	Alces alces	VBY04	Visby	Sweden	antler	Viking Age			-22.3	4.3			3	Schyman 2012	Schyman J Masters thesis 2012
734	Moose	Alces alces	KOP162	Köpingsvik Öland	Sweden	antler				-21.6	4.1			2.9	Eriksson et al 2008	Journal of Anthropological Archaeology 27 (2008): 520–543	https://doi.org/10.1016/j.jaa.2008.08.004
735	Moose	Alces alces	KOP194	Köpingsvik Öland	Sweden	bone				-20.4	5.5			3.2	Eriksson et al 2008	Journal of Anthropological Archaeology 27 (2008): 520–543	https://doi.org/10.1016/j.jaa.2008.08.004
736	Moose	Alces alces	KOR01	Korsnäs; Grödinge RAÄ447	Sweden	bone	Neolithic Pitted ware			-21.8	1.9			3.4	Fornander et al 2008	Journal of Anthropological Archaeology 27 (2008): 281–297	https://doi.org/10.1016/j.jaa.2008.03.004
737	Moose	Alces alces	KOR02	Korsnäs; Grödinge RAÄ447	Sweden	bone	Neolithic Pitted ware	4365	40	-21.1	2.1			3.4	Fornander et al 2008	Journal of Anthropological Archaeology 27 (2008): 281–297	https://doi.org/10.1016/j.jaa.2008.03.004
738	Moose	Alces alces	KOR03	Korsnäs; Grödinge RAÄ447	Sweden	bone	Neolithic Pitted ware			-23.2	2.6			3.6	Fornander et al 2008	Journal of Anthropological Archaeology 27 (2008): 281–297	https://doi.org/10.1016/j.jaa.2008.03.004
739	Moose	Alces alces	3	Ringsjöholm	Sweden	bone	MM			-23.2	3.8	39.5	13.7	3.37	Boethius & Ahlström 2018	Journal of Archaeological Science 93 (2018): 196–210	https://doi.org/10.1016/j.jas.2018.02.018
740	Moose	Alces alces	23	Ageröd V	Sweden	bone	MM			-22.5	3.9	44.4	15.2	3.411	Boethius & Ahlström 2018	Journal of Archaeological Science 93 (2018): 196–210	https://doi.org/10.1016/j.jas.2018.02.018
741	Moose	Alces alces	31	Tågerup 1:1	Sweden	bone	MM			-22.7	4.7	39	13.2	3.438	Boethius & Ahlström 2018	Journal of Archaeological Science 93 (2018): 196–210	https://doi.org/10.1016/j.jas.2018.02.018
742	Moose	Alces alces	175	Almeö 96 b	Sweden	bone	EM			-19.5	5.6	44.2	15.6	3.294	Boethius & Ahlström 2018	Journal of Archaeological Science 93 (2018): 196–210	https://doi.org/10.1016/j.jas.2018.02.018
743	Moose	Alces alces	183	Almeö 96 b	Sweden	bone	EM			-23	2	41.6	13.6	3.577	Boethius & Ahlström 2018	Journal of Archaeological Science 93 (2018): 196–210	https://doi.org/10.1016/j.jas.2018.02.018
744	Moose	Alces alces	189	Almeö 96 b	Sweden	bone	EM			-22.1	1.9	44.2	15	3.431	Boethius & Ahlström 2018	Journal of Archaeological Science 93 (2018): 196–210	https://doi.org/10.1016/j.jas.2018.02.018
745	Moose	Alces alces	198	Segebro	Sweden	bone	MM			-20.9	4.9	44.7	15.9	3.281	Boethius & Ahlström 2018	Journal of Archaeological Science 93 (2018): 196–210	https://doi.org/10.1016/j.jas.2018.02.018
746	Moose	Alces alces	215	Bökeberg	Sweden	NA	LM			-22.9	3.4	43.6	14.9	3.411	Boethius & Ahlström 2018	Journal of Archaeological Science 93 (2018): 196–210	https://doi.org/10.1016/j.jas.2018.02.018
747	Moose	Alces alces	306	Huseby klev	Sweden	bone	EM			-21	2.6	44.2	15.8	3.267	Boethius & Ahlström 2018	Journal of Archaeological Science 93 (2018): 196–210	https://doi.org/10.1016/j.jas.2018.02.018
748	Moose	Alces alces	MKA 49	Motala Kanaljorden	Sweden	bone	Mesolithic	6802	40	-21.5	1.9	41.9	14.8	3.3	Eriksson et al 2018	Journal of Archaeological Science: Reports 17 (2018): 904–918	https://doi.org/10.1016/j.jasrep.2016.05.052
749	Moose	Alces alces	MKA 53	Motala Kanaljorden	Sweden	bone	Mesolithic	6802	43	-22.1	3.5	42.4	15	3.3	Eriksson et al 2018	Journal of Archaeological Science: Reports 17 (2018): 904–918	https://doi.org/10.1016/j.jasrep.2016.05.052
750	Moose	Alces alces	MKA 57	Motala Kanaljorden	Sweden	bone	Mesolithic	6703	46	-20.8	1.8	42.6	14.9	3.3	Eriksson et al 2018	Journal of Archaeological Science: Reports 17 (2018): 904–918	https://doi.org/10.1016/j.jasrep.2016.05.052
751	Moose	Alces alces	MOT 033	Motala Strandvägen	Sweden	dentine	Mesolithic	6673	195	-21.6	4.6			3.4	Eriksson et al 2018	Journal of Archaeological Science: Reports 17 (2018): 904–918	https://doi.org/10.1016/j.jasrep.2016.05.052
752	Moose	Alces alces	Mz2	Szczepanki	Poland	bone	Mesolithic			-23.5	3.9	39.7	13	3.6	Tomczyk et al 2020	Journal of Archaeological Science: Reports 29 (2020): 102141	https://doi.org/10.1016/j.jasrep.2019.102141
753	Moose	Alces alces	Mz3	Szczepanki	Poland	bone	Mesolithic			-22.6	4.6	40	12.9	3.6	Tomczyk et al 2020	Journal of Archaeological Science: Reports 29 (2020): 102141	https://doi.org/10.1016/j.jasrep.2019.102141
754	Moose	Alces alces	Mz4	Szczepanki	Poland	bone	Mesolithic			-22.4	5	40.2	14.8	3.2	Tomczyk et al 2020	Journal of Archaeological Science: Reports 29 (2020): 102141	https://doi.org/10.1016/j.jasrep.2019.102141
755	Moose	Alces alces	Mz5	Szczepanki	Poland	bone	Mesolithic			-22.6	4	39.2	13.9	3.3	Tomczyk et al 2020	Journal of Archaeological Science: Reports 29 (2020): 102141	https://doi.org/10.1016/j.jasrep.2019.102141
756	Moose	Alces alces	Mz6	Szczepanki	Poland	bone	Mesolithic			-18.3	7.6	39.9	14.2	3.3	Tomczyk et al 2020	Journal of Archaeological Science: Reports 29 (2020): 102141	https://doi.org/10.1016/j.jasrep.2019.102141
757	Moose	Alces alces	Mz7	Szczepanki	Poland	bone	Mesolithic			-21.4	3.6	40.5	14.4	3.3	Tomczyk et al 2020	Journal of Archaeological Science: Reports 29 (2020): 102141	https://doi.org/10.1016/j.jasrep.2019.102141
758	Moose	Alces alces	M1; 3	Minino	Russia	bone	Mesolithic-Neolithic	7205	60	-22.1	3.7			3.3	Wood et al 2013	Radiocarbon 55:1 (2013): 163–177	https://doi.org/10.2458/azu_js_rc.v55i1.16448
759	Moose	Alces alces	M1; 5	Minino	Russia	bone	Mesolithic-Neolithic	9070	110	-21.4	5.5			3.3	Wood et al 2013	Radiocarbon 55:1 (2013): 163–177	https://doi.org/10.2458/azu_js_rc.v55i1.16448
760	Moose	Alces alces	M1; 6	Minino	Russia	bone	Mesolithic-Neolithic	7568	38	-21.5	5.7			3.4	Wood et al 2013	Radiocarbon 55:1 (2013): 163–177	https://doi.org/10.2458/azu_js_rc.v55i1.16448
761	Moose	Alces alces	110	Minino	Russia	bone	Mesolithic-Neolithic			-22.5	2.5			3.2	Wood et al 2013	Radiocarbon 55:1 (2013): 163–177	https://doi.org/10.2458/azu_js_rc.v55i1.16448
762	Moose	Alces alces	119	Minino	Russia	bone	Mesolithic-Neolithic			-21.6	3.2			3.3	Wood et al 2013	Radiocarbon 55:1 (2013): 163–177	https://doi.org/10.2458/azu_js_rc.v55i1.16448
763	Moose	Alces alces	131	Minino	Russia	bone	Mesolithic-Neolithic			-22.3	3.8			3.2	Wood et al 2013	Radiocarbon 55:1 (2013): 163–177	https://doi.org/10.2458/azu_js_rc.v55i1.16448
764	Moose	Alces alces	M1; 20	Minino	Russia	dentine	Mesolithic-Neolithic	8895	40	-21.9	3.7			3.2	Wood et al 2013	Radiocarbon 55:1 (2013): 163–177	https://doi.org/10.2458/azu_js_rc.v55i1.16448
765	Moose	Alces alces	MII; V	Minino	Russia	dentine	Mesolithic-Neolithic			-21.4	4			3.2	Wood et al 2013	Radiocarbon 55:1 (2013): 163–177	https://doi.org/10.2458/azu_js_rc.v55i1.16448
766	Moose	Alces alces	102	Minino	Russia	dentine	Mesolithic-Neolithic			-21.3	5			3.2	Wood et al 2013	Radiocarbon 55:1 (2013): 163–177	https://doi.org/10.2458/azu_js_rc.v55i1.16448
767	Moose	Alces alces	127	Minino	Russia	dentine	Mesolithic-Neolithic			-21.7	4.6			3.2	Wood et al 2013	Radiocarbon 55:1 (2013): 163–177	https://doi.org/10.2458/azu_js_rc.v55i1.16448
768	Roe deer	Capreolus capreolus	1734AKK	Norsminde	Denmark	bone	Late Mesolithic Ertebølle			-23	5.4			3.24	Craig et al 2006	Journal of Archaeological Science 33 (2006): 1642–1646	https://doi.org/10.1016/j.jas.2006.05.006
769	Roe deer	Capreolus capreolus	1734ATK	Norsminde	Denmark	bone	Late Mesolithic Ertebølle			-23.9	4.6			3.27	Craig et al 2006	Journal of Archaeological Science 33 (2006): 1642–1646	https://doi.org/10.1016/j.jas.2006.05.006
770	Roe deer	Capreolus capreolus	1734NPS	Norsminde	Denmark	bone	Late Mesolithic Ertebølle			-22.4	5.5			3.25	Craig et al 2006	Journal of Archaeological Science 33 (2006): 1642–1646	https://doi.org/10.1016/j.jas.2006.05.006
771	Roe deer	Capreolus capreolus	1734PBC	Norsminde	Denmark	bone	Late Mesolithic Ertebølle			-23.3	6.1			3.21	Craig et al 2006	Journal of Archaeological Science 33 (2006): 1642–1646	https://doi.org/10.1016/j.jas.2006.05.006
772	Roe deer	Capreolus capreolus	1734TQM	Norsminde	Denmark	bone	Early Neolithic Funnel Beaker			-23	6			3.26	Craig et al 2006	Journal of Archaeological Science 33 (2006): 1642–1646	https://doi.org/10.1016/j.jas.2006.05.006
773	Roe deer	Capreolus capreolus	2911ABCW	Bjørnsholm	Denmark	bone	Early Neolithic Funnel Beaker			-21.1	5.4			3.07	Craig et al 2006	Journal of Archaeological Science 33 (2006): 1642–1646	https://doi.org/10.1016/j.jas.2006.05.006
774	Roe deer	Capreolus capreolus	2911ABCZ	Bjørnsholm	Denmark	bone	Early Neolithic Funnel Beaker			-22.1	4.5			3.09	Craig et al 2006	Journal of Archaeological Science 33 (2006): 1642–1646	https://doi.org/10.1016/j.jas.2006.05.006
775	Roe deer	Capreolus capreolus	2911AFCL	Bjørnsholm	Denmark	bone	Late Mesolithic Ertebølle			-21.6	3.9			3.13	Craig et al 2006	Journal of Archaeological Science 33 (2006): 1642–1646	https://doi.org/10.1016/j.jas.2006.05.006
776	Roe deer	Capreolus capreolus	2911HA1	Bjørnsholm	Denmark	bone				-22.9	3.6			3.1	Craig et al 2006	Journal of Archaeological Science 33 (2006): 1642–1646	https://doi.org/10.1016/j.jas.2006.05.006
777	Roe deer	Capreolus capreolus	2911HA2	Bjørnsholm	Denmark	bone				-21.9	3.5			3.04	Craig et al 2006	Journal of Archaeological Science 33 (2006): 1642–1646	https://doi.org/10.1016/j.jas.2006.05.006
778	Roe deer	Capreolus capreolus	AAR-8610	Argus	Denmark	bone	Mesolithic or neolithic			-23.5	3.9			3.3	Fischer et al 2007	Journal of Archaeological Science 34 (2007): 2125–2150	https://doi.org/10.1016/j.jas.2007.02.028
779	Roe deer	Capreolus capreolus	AAR-8610-2	Argus	Denmark	bone	Mesolithic or neolithic			-24	5			3.3	Fischer et al 2007	Journal of Archaeological Science 34 (2007): 2125–2150	https://doi.org/10.1016/j.jas.2007.02.028
780	Roe deer	Capreolus capreolus	AAR-8610-3	Argus	Denmark	bone	Mesolithic or neolithic			-22.8	4.6			3.2	Fischer et al 2007	Journal of Archaeological Science 34 (2007): 2125–2150	https://doi.org/10.1016/j.jas.2007.02.028
781	Roe deer	Capreolus capreolus	AAR-8659-1/1922	Holmegård I	Denmark	bone	Mesolithic or neolithic			-24.3	3.8			3.4	Fischer et al 2007	Journal of Archaeological Science 34 (2007): 2125–2150	https://doi.org/10.1016/j.jas.2007.02.028
782	Roe deer	Capreolus capreolus	AAR-8659-2/1922	Holmegård I	Denmark	bone	Mesolithic or neolithic			-22.6	3.1			3.4	Fischer et al 2007	Journal of Archaeological Science 34 (2007): 2125–2150	https://doi.org/10.1016/j.jas.2007.02.028
783	Roe deer	Capreolus capreolus	AF285	Storelyng VI	Denmark	bone	Mesolithic or neolithic			-21.6	4.2			3.1	Fischer et al 2007	Journal of Archaeological Science 34 (2007): 2125–2150	https://doi.org/10.1016/j.jas.2007.02.028
784	Roe deer	Capreolus capreolus	AF4300	Storelyng VI	Denmark	bone	Mesolithic or neolithic			-21.4	3.4			3.1	Fischer et al 2007	Journal of Archaeological Science 34 (2007): 2125–2150	https://doi.org/10.1016/j.jas.2007.02.028
785	Roe deer	Capreolus capreolus	AF9107	Storelyng VI	Denmark	bone	Mesolithic or neolithic			-22.5	2.5			3.2	Fischer et al 2007	Journal of Archaeological Science 34 (2007): 2125–2150	https://doi.org/10.1016/j.jas.2007.02.028
786	Roe deer	Capreolus capreolus	KJGCol-3	Bjørnsholm	Denmark	bone	EBK/ENI			-21.6	4.4			3.23	Gron & Rowley-Conwy 2017	The Holocene 27:1 (2017): 98–109	https://doi.org/10.1177/0959683616652705
787	Roe deer	Capreolus capreolus	KJGCol-7	Ertebølle	Denmark	bone	EBK			-23.1	3.9			3.18	Gron & Rowley-Conwy 2017	The Holocene 27:1 (2017): 98–109	https://doi.org/10.1177/0959683616652705
788	Roe deer	Capreolus capreolus	KJGCol-8	Ertebølle	Denmark	bone	EBK			-22.9	5			3.27	Gron & Rowley-Conwy 2017	The Holocene 27:1 (2017): 98–109	https://doi.org/10.1177/0959683616652705
789	Roe deer	Capreolus capreolus	268274	Fårevejle	Denmark	bone	EBK			-23.1	4.7			3.42	Gron & Rowley-Conwy 2017	The Holocene 27:1 (2017): 98–109	https://doi.org/10.1177/0959683616652705
790	Roe deer	Capreolus capreolus	268275	Fårevejle	Denmark	bone	EBK			-22.2	4.6			3.31	Gron & Rowley-Conwy 2017	The Holocene 27:1 (2017): 98–109	https://doi.org/10.1177/0959683616652705
791	Roe deer	Capreolus capreolus	268277	Fårevejle	Denmark	bone	EBK			-23.4	5.2			3.41	Gron & Rowley-Conwy 2017	The Holocene 27:1 (2017): 98–109	https://doi.org/10.1177/0959683616652705
792	Roe deer	Capreolus capreolus	268287	Havnø	Denmark	bone	EBK/ENI			-22	4.6			3.33	Gron & Rowley-Conwy 2017	The Holocene 27:1 (2017): 98–109	https://doi.org/10.1177/0959683616652705
793	Roe deer	Capreolus capreolus	284454	Havnø	Denmark	bone	EBK/ENI			-21.5	3.7			3.31	Gron & Rowley-Conwy 2017	The Holocene 27:1 (2017): 98–109	https://doi.org/10.1177/0959683616652705
794	Roe deer	Capreolus capreolus	284455	Havnø	Denmark	bone	EBK/ENI			-22.9	3.5			3.25	Gron & Rowley-Conwy 2017	The Holocene 27:1 (2017): 98–109	https://doi.org/10.1177/0959683616652705
795	Roe deer	Capreolus capreolus	284456	Havnø	Denmark	bone	EBK/ENI			-21.8	4.3			3.44	Gron & Rowley-Conwy 2017	The Holocene 27:1 (2017): 98–109	https://doi.org/10.1177/0959683616652705
796	Roe deer	Capreolus capreolus	284457	Havnø	Denmark	bone	EBK/ENI			-22.1	4.2			3.28	Gron & Rowley-Conwy 2017	The Holocene 27:1 (2017): 98–109	https://doi.org/10.1177/0959683616652705
797	Roe deer	Capreolus capreolus	KJGCol-2	Ringkloster	Denmark	bone	EBK			-24.3	5			3.29	Gron & Rowley-Conwy 2017	The Holocene 27:1 (2017): 98–109	https://doi.org/10.1177/0959683616652705
798	Roe deer	Capreolus capreolus	KJGCol-4	Ringkloster	Denmark	bone	EBK			-24	5.9			3.2	Gron & Rowley-Conwy 2017	The Holocene 27:1 (2017): 98–109	https://doi.org/10.1177/0959683616652705
799	Roe deer	Capreolus capreolus	268294	Smakkerup Huse	Denmark	bone	EBK			-23.2	5.1			3.31	Gron & Rowley-Conwy 2017	The Holocene 27:1 (2017): 98–109	https://doi.org/10.1177/0959683616652705
800	Roe deer	Capreolus capreolus	268301	Smakkerup Huse	Denmark	bone	EBK			-21.8	4.6			3.45	Gron & Rowley-Conwy 2017	The Holocene 27:1 (2017): 98–109	https://doi.org/10.1177/0959683616652705
801	Roe deer	Capreolus capreolus	KJGCol-58	Thygeslund	Denmark	bone	EBK/ENI			-22.2	4.9			3.2	Gron & Rowley-Conwy 2017	The Holocene 27:1 (2017): 98–109	https://doi.org/10.1177/0959683616652705
802	Roe deer	Capreolus capreolus	KJGCol-5	Visborg	Denmark	bone	EBK/ENI			-22.7	4.1			3.27	Gron & Rowley-Conwy 2017	The Holocene 27:1 (2017): 98–109	https://doi.org/10.1177/0959683616652705
803	Roe deer	Capreolus capreolus	KJGCol-6	Visborg	Denmark	bone	EBK/ENI			-22.9	5.3			3.22	Gron & Rowley-Conwy 2017	The Holocene 27:1 (2017): 98–109	https://doi.org/10.1177/0959683616652705
804	Roe deer	Capreolus capreolus	AGE22	Ageröd I Munkarp Skåne	Sweden	bone	Neolithic early Atlantic			-22	3.7			3.3	Lidén et al 2004	Antiquity 78: 299 (2004): 23–33	https://doi.org/10.1017/S0003598X00092899
805	Roe deer	Capreolus capreolus	AGE23	Ageröd I Munkarp Skåne	Sweden	bone	Neolithic early Atlantic			-23	3.8			3.3	Lidén et al 2004	Antiquity 78: 299 (2004): 23–33	https://doi.org/10.1017/S0003598X00092899
806	Roe deer	Capreolus capreolus	AGE25	Ageröd I Munkarp Skåne	Sweden	bone	Neolithic early Atlantic			-22.4	3.2			3.3	Lidén et al 2004	Antiquity 78: 299 (2004): 23–33	https://doi.org/10.1017/S0003598X00092899
807	Roe deer	Capreolus capreolus	KOP116	Köpingsvik Öland	Sweden	bone				-23.4	4.5			3.1	Eriksson et al 2008	Journal of Anthropological Archaeology 27 (2008): 520–543	https://doi.org/10.1016/j.jaa.2008.08.004
808	Roe deer	Capreolus capreolus	KOP146	Köpingsvik Öland	Sweden	bone				-23.1	3.8	39.6	13.7	3.1	Eriksson et al 2008	Journal of Anthropological Archaeology 27 (2008): 520–543	https://doi.org/10.1016/j.jaa.2008.08.004
809	Roe deer	Capreolus capreolus	42	Tågerup 1:1	Sweden	bone	MM			-23.6	4.2	42.3	15.2	3.255	Boethius & Ahlström 2018	Journal of Archaeological Science 93 (2018): 196–210	https://doi.org/10.1016/j.jas.2018.02.018
810	Roe deer	Capreolus capreolus	122	Sunnansund	Sweden	bone	EM			-21.4	6.9	34.8	12.5	3.231	Boethius & Ahlström 2018	Journal of Archaeological Science 93 (2018): 196–210	https://doi.org/10.1016/j.jas.2018.02.018
811	Roe deer	Capreolus capreolus	147	Balltorp	Sweden	bone	EM			-21.1	3.7	31.6	11	3.346	Boethius & Ahlström 2018	Journal of Archaeological Science 93 (2018): 196–210	https://doi.org/10.1016/j.jas.2018.02.018
812	Roe deer	Capreolus capreolus	153	Balltorp	Sweden	bone	EM			-24.2	2.8	43.6	15.3	3.332	Boethius & Ahlström 2018	Journal of Archaeological Science 93 (2018): 196–210	https://doi.org/10.1016/j.jas.2018.02.018
813	Roe deer	Capreolus capreolus	169	Almeö 96A	Sweden	bone	EM			-21.9	3	44.1	15	3.422	Boethius & Ahlström 2018	Journal of Archaeological Science 93 (2018): 196–210	https://doi.org/10.1016/j.jas.2018.02.018
814	Roe deer	Capreolus capreolus	192	Segebro	Sweden	bone	MM			-23.5	3.8	43.4	15.1	3.351	Boethius & Ahlström 2018	Journal of Archaeological Science 93 (2018): 196–210	https://doi.org/10.1016/j.jas.2018.02.018
815	Roe deer	Capreolus capreolus	305	Huseby klev	Sweden	bone	EM			-21.9	3.6	43.4	14.1	3.588	Boethius & Ahlström 2018	Journal of Archaeological Science 93 (2018): 196–210	https://doi.org/10.1016/j.jas.2018.02.018
816	Roe deer	Capreolus capreolus	323	Huseby klev	Sweden	bone	EM			-22.6	2.7	44.3	15.2	3.405	Boethius & Ahlström 2018	Journal of Archaeological Science 93 (2018): 196–210	https://doi.org/10.1016/j.jas.2018.02.018
817	Roe deer	Capreolus capreolus	MOT 039	Motala Strandvägen	Sweden	bone	Mesolithic	6193	84	-22.4	3.1	42.6	14.6	3.4	Eriksson et al 2018	Journal of Archaeological Science: Reports 17 (2018): 904–918	https://doi.org/10.1016/j.jasrep.2016.05.052
818	Roe deer	Capreolus capreolus	MOT 111	Motala Strandvägen	Sweden	bone	Mesolithic			-22.8	3.9	40.2	14	3.4	Eriksson et al 2018	Journal of Archaeological Science: Reports 17 (2018): 904–918	https://doi.org/10.1016/j.jasrep.2016.05.052
819	Roe deer	Capreolus capreolus	MOT 103	Motala Strandvägen	Sweden	dentine	Mesolithic			-21.9	5.3	38.4	13.1		Eriksson et al 2018	Journal of Archaeological Science: Reports 17 (2018): 904–918	https://doi.org/10.1016/j.jasrep.2016.05.052
820	Roe deer	Capreolus capreolus	KIA 46916	Ostorf	Germany	dentine	Neolithic			-22.1	4.4	46.7	16.2	3.4	Fernandes et al 2015	American Journal of Biological Anthropology 158:2 (2015): 325–340	https://doi.org/10.1002/ajpa.22788
821	Roe deer	Capreolus capreolus	KIA 46920	Ostorf	Germany	dentine	Neolithic			-21.7	5.2	49.1	17.2	3.3	Fernandes et al 2015	American Journal of Biological Anthropology 158:2 (2015): 325–340	https://doi.org/10.1002/ajpa.22788
822	Roe deer	Capreolus capreolus	No 505 season 1881	Riņņukalns	Latvia	bone	ca. 3500 cal BC			-20.3	9.3			3.4	Meadows et al 2016	Journal of Archaeological Science: Reports 6 (2016): 678–689	https://doi.org/10.1016/j.jasrep.2015.10.024
823	Roe deer	Capreolus capreolus		Nida	Lithuania	bone	Neolithic			-21	6.1	44.3	15.9	3.3	Piličiauskas et al 2017a	Journal of Archaological Science: Reports 14 (2017): 530–542	https://doi.org/10.1016/j.jasrep.2017.06.004
824	Roe deer	Capreolus capreolus		Šventoji 43	Lithuania	bone	Subneolithic			-23.5	4.5	40.9	14.8	3.2	Piličiauskas et al 2017b	Archaeological and Anthropological Sciences 9:7 (2017): 1421–1437	https://doi.org/10.1007/s12520-017-0463-z
825	Red deer	Cervus elaphus	36	Žemaitiškė 1	Lithuania	bone	Late neolithic			-24.1	4			3.5	Antanaitis-Jacobs et al 2009	Archaeologia Baltica 12 (2019): 12–30
826	Red deer	Cervus elaphus	6919	Turlojiškė	Lithuania	bone	Bronze			-22.5	5.5			3.4	Antanaitis-Jacobs et al 2009	Archaeologia Baltica 12 (2019): 12–30
827	Red deer	Cervus elaphus		Žemaitiškė 2	Lithuania	bone	Subneolithic			-22.3	5.4	44.6	16.3	3.2	Piličiauskas et al 2017a	Journal of Archaological Science: Reports 14 (2017): 530–542	https://doi.org/10.1016/j.jasrep.2017.06.004
828	Red deer	Cervus elaphus		Žemaitiškė 2	Lithuania	bone	Subneolithic			-23.2	4.2	38.4	14	3.2	Piličiauskas et al 2017a	Journal of Archaological Science: Reports 14 (2017): 530–542	https://doi.org/10.1016/j.jasrep.2017.06.004
829	Red deer	Cervus elaphus	ŽPVR 36	The lower castle of Vilnius and The Palace of the Grand Dukes of Lithuania; Vilnius	Lithuania	bone	16–17th C AD			-22.3	3.6	32.1	11.7	3.2	Simčenka et al 2020	Archaeological and Anthropological Sciences 12 (2020): 1–14	https://doi.org/10.1007/s12520-020-01063-9
830	Red deer	Cervus elaphus	AAR-8611	Argus	Denmark	bone	Mesolithic or neolithic			-22.6	4.9			3.3	Fischer et al 2007	Journal of Archaeological Science 34 (2007): 2125–2150	https://doi.org/10.1016/j.jas.2007.02.028
831	Red deer	Cervus elaphus	AAR-8611-2	Argus	Denmark	bone	Mesolithic or neolithic			-23.6	4.6			3.5	Fischer et al 2007	Journal of Archaeological Science 34 (2007): 2125–2150	https://doi.org/10.1016/j.jas.2007.02.028
832	Red deer	Cervus elaphus	AAR-8611-3	Argus	Denmark	bone	Mesolithic or neolithic			-21.5	6			3.3	Fischer et al 2007	Journal of Archaeological Science 34 (2007): 2125–2150	https://doi.org/10.1016/j.jas.2007.02.028
833	Red deer	Cervus elaphus	AAR-8658-1/1922	Holmegård I	Denmark	bone	Mesolithic or neolithic			-22.7	4.7			3.4	Fischer et al 2007	Journal of Archaeological Science 34 (2007): 2125–2150	https://doi.org/10.1016/j.jas.2007.02.028
834	Red deer	Cervus elaphus	AAR-8658-2/1922	Holmegård I	Denmark	bone	Mesolithic or neolithic			-22.9	4.6			3.3	Fischer et al 2007	Journal of Archaeological Science 34 (2007): 2125–2150	https://doi.org/10.1016/j.jas.2007.02.028
835	Red deer	Cervus elaphus	K-4881/BCH198: 37a+b	Åkonge	Denmark	bone		5060	65	-22.5	4.6			3.2	Fischer et al 2007	Journal of Archaeological Science 34 (2007): 2125–2150	https://doi.org/10.1016/j.jas.2007.02.028
836	Red deer	Cervus elaphus	K-4882/BCH198: 17a+b	Åkonge	Denmark	bone		5070	65	-22.8	5.4			3.2	Fischer et al 2007	Journal of Archaeological Science 34 (2007): 2125–2150	https://doi.org/10.1016/j.jas.2007.02.028
837	Red deer	Cervus elaphus	K-4883/BCH198: 26a+b	Åkonge	Denmark	bone		5010	65	-22.6	4.5			3.2	Fischer et al 2007	Journal of Archaeological Science 34 (2007): 2125–2150	https://doi.org/10.1016/j.jas.2007.02.028
838	Red deer	Cervus elaphus	K-4884/BCH198: 19a+b	Åkonge	Denmark	bone		4990	65	-22.1	4.8			3.2	Fischer et al 2007	Journal of Archaeological Science 34 (2007): 2125–2150	https://doi.org/10.1016/j.jas.2007.02.028
839	Red deer	Cervus elaphus	K-4885/BCH198: 43a+b	Åkonge	Denmark	bone		4950	60	-23	5			3.2	Fischer et al 2007	Journal of Archaeological Science 34 (2007): 2125–2150	https://doi.org/10.1016/j.jas.2007.02.028
840	Red deer	Cervus elaphus	K-4886/BCH198: 10a+b	Åkonge	Denmark	bone		4990	65	-22.6	4.2			3.2	Fischer et al 2007	Journal of Archaeological Science 34 (2007): 2125–2150	https://doi.org/10.1016/j.jas.2007.02.028
841	Red deer	Cervus elaphus	Poz-12127/BCH195: 12+26	Krabbesholm	Denmark	bone		5147	36	-22.3	3.1			3.2	Fischer et al 2007	Journal of Archaeological Science 34 (2007): 2125–2150	https://doi.org/10.1016/j.jas.2007.02.028
842	Red deer	Cervus elaphus	KJGCol-10	Ertebølle	Denmark	bone	EBK			-21.5	4.1			3.4	Gron & Rowley-Conwy 2017	The Holocene 27:1 (2017): 98–109	https://doi.org/10.1177/0959683616652705
843	Red deer	Cervus elaphus	KJGCol-11	Ertebølle	Denmark	bone	EBK			-22.1	4.3			3.32	Gron & Rowley-Conwy 2017	The Holocene 27:1 (2017): 98–109	https://doi.org/10.1177/0959683616652705
844	Red deer	Cervus elaphus	KJGCol-12	Ertebølle	Denmark	bone	EBK			-21.7	4.3			3.18	Gron & Rowley-Conwy 2017	The Holocene 27:1 (2017): 98–109	https://doi.org/10.1177/0959683616652705
845	Red deer	Cervus elaphus	268278	Fårevejle	Denmark	bone	EBK			-22.1	4.3			3.53	Gron & Rowley-Conwy 2017	The Holocene 27:1 (2017): 98–109	https://doi.org/10.1177/0959683616652705
846	Red deer	Cervus elaphus	268279	Fårevejle	Denmark	bone	EBK			-22.8	4.4			3.5	Gron & Rowley-Conwy 2017	The Holocene 27:1 (2017): 98–109	https://doi.org/10.1177/0959683616652705
847	Red deer	Cervus elaphus	268281	Fårevejle	Denmark	bone	EBK			-23.2	4.1			3.55	Gron & Rowley-Conwy 2017	The Holocene 27:1 (2017): 98–109	https://doi.org/10.1177/0959683616652705
848	Red deer	Cervus elaphus	268288	Havnø	Denmark	bone	EBK/ENI			-22.6	4			3.48	Gron & Rowley-Conwy 2017	The Holocene 27:1 (2017): 98–109	https://doi.org/10.1177/0959683616652705
849	Red deer	Cervus elaphus	284458	Havnø	Denmark	bone	EBK/ENI			-21.6	4.6			3.4	Gron & Rowley-Conwy 2017	The Holocene 27:1 (2017): 98–109	https://doi.org/10.1177/0959683616652705
850	Red deer	Cervus elaphus	284459	Havnø	Denmark	bone	EBK/ENI			-21.9	3.5			3.58	Gron & Rowley-Conwy 2017	The Holocene 27:1 (2017): 98–109	https://doi.org/10.1177/0959683616652705
851	Red deer	Cervus elaphus	284460	Havnø	Denmark	bone	EBK/ENI			-21.8	3.4			3.3	Gron & Rowley-Conwy 2017	The Holocene 27:1 (2017): 98–109	https://doi.org/10.1177/0959683616652705
852	Red deer	Cervus elaphus	284471	Havnø	Denmark	bone	EBK/ENI			-21.5	4.5			3.37	Gron & Rowley-Conwy 2017	The Holocene 27:1 (2017): 98–109	https://doi.org/10.1177/0959683616652705
853	Red deer	Cervus elaphus	284472	Havnø	Denmark	bone	EBK/ENI			-21.8	4.6			3.56	Gron & Rowley-Conwy 2017	The Holocene 27:1 (2017): 98–109	https://doi.org/10.1177/0959683616652705
854	Red deer	Cervus elaphus	284473	Havnø	Denmark	bone	EBK/ENI			-23.2	4.7			3.3	Gron & Rowley-Conwy 2017	The Holocene 27:1 (2017): 98–109	https://doi.org/10.1177/0959683616652705
855	Red deer	Cervus elaphus	284474	Havnø	Denmark	bone	EBK/ENI			-21.4	3.6			3.39	Gron & Rowley-Conwy 2017	The Holocene 27:1 (2017): 98–109	https://doi.org/10.1177/0959683616652705
856	Red deer	Cervus elaphus	KJGCol-13	Krabbesholm II	Denmark	bone	EBK/ENI			-23.6	5.4			3.16	Gron & Rowley-Conwy 2017	The Holocene 27:1 (2017): 98–109	https://doi.org/10.1177/0959683616652705
857	Red deer	Cervus elaphus	268296	Smakkerup Huse	Denmark	bone	EBK			-23.6	5.2			3.3	Gron & Rowley-Conwy 2017	The Holocene 27:1 (2017): 98–109	https://doi.org/10.1177/0959683616652705
858	Red deer	Cervus elaphus	268297	Smakkerup Huse	Denmark	bone	EBK			-22.5	4.4			3.33	Gron & Rowley-Conwy 2017	The Holocene 27:1 (2017): 98–109	https://doi.org/10.1177/0959683616652705
859	Red deer	Cervus elaphus	268298	Smakkerup Huse	Denmark	bone	EBK			-22.5	4.2			3.27	Gron & Rowley-Conwy 2017	The Holocene 27:1 (2017): 98–109	https://doi.org/10.1177/0959683616652705
860	Red deer	Cervus elaphus	KJGCol-59	Thygeslund	Denmark	bone	EBK/ENI			-21.8	4.5			3.19	Gron & Rowley-Conwy 2017	The Holocene 27:1 (2017): 98–109	https://doi.org/10.1177/0959683616652705
861	Red deer	Cervus elaphus	KJGCol-16	Visborg	Denmark	bone	EBK/ENI			-22.2	3.9			3.23	Gron & Rowley-Conwy 2017	The Holocene 27:1 (2017): 98–109	https://doi.org/10.1177/0959683616652705
862	Red deer	Cervus elaphus	AGE06	Ageröd I Munkarp Skåne	Sweden	bone	Neolithic early Atlantic			-22.9	3.4			3.3	Lidén et al 2004	Antiquity 78: 299 (2004): 23–33	https://doi.org/10.1017/S0003598X00092899
863	Red deer	Cervus elaphus	AGE21	Ageröd I Munkarp Skåne	Sweden	bone	Neolithic early Atlantic			-22	4.8			3.3	Lidén et al 2004	Antiquity 78: 299 (2004): 23–33	https://doi.org/10.1017/S0003598X00092899
864	Red deer	Cervus elaphus	AGE26	Ageröd I Munkarp Skåne	Sweden	bone	Neolithic early Atlantic			-22.8	2.9			3.6	Lidén et al 2004	Antiquity 78: 299 (2004): 23–33	https://doi.org/10.1017/S0003598X00092899
865	Red deer	Cervus elaphus	20	Ageröd V	Sweden	bone	MM			-22.7	3.6	42.9	15.1	3.326	Boethius & Ahlström 2018	Journal of Archaeological Science 93 (2018): 196–210	https://doi.org/10.1016/j.jas.2018.02.018
866	Red deer	Cervus elaphus	37	Tågerup 1:1	Sweden	bone	MM			-23.5	4	42.6	15	3.325	Boethius & Ahlström 2018	Journal of Archaeological Science 93 (2018): 196–210	https://doi.org/10.1016/j.jas.2018.02.018
867	Red deer	Cervus elaphus	145	Balltorp	Sweden	bone	EM			-22	3.4	36.4	12.3	3.461	Boethius & Ahlström 2018	Journal of Archaeological Science 93 (2018): 196–210	https://doi.org/10.1016/j.jas.2018.02.018
868	Red deer	Cervus elaphus	151	Balltorp	Sweden	bone	EM			-21.8	6.3	42.9	15	3.338	Boethius & Ahlström 2018	Journal of Archaeological Science 93 (2018): 196–210	https://doi.org/10.1016/j.jas.2018.02.018
869	Red deer	Cervus elaphus	155	Balltorp	Sweden	bone	EM			-21.6	4	38.6	13.1	3.438	Boethius & Ahlström 2018	Journal of Archaeological Science 93 (2018): 196–210	https://doi.org/10.1016/j.jas.2018.02.018
870	Red deer	Cervus elaphus	158	Almeö 96A	Sweden	bone	EM			-21.4	4.3	43	15.3	3.291	Boethius & Ahlström 2018	Journal of Archaeological Science 93 (2018): 196–210	https://doi.org/10.1016/j.jas.2018.02.018
871	Red deer	Cervus elaphus	163	Almeö 96A	Sweden	bone	EM			-21.8	4.3	42.8	15.1	3.301	Boethius & Ahlström 2018	Journal of Archaeological Science 93 (2018): 196–210	https://doi.org/10.1016/j.jas.2018.02.018
872	Red deer	Cervus elaphus	165	Almeö 96A	Sweden	bone	EM			-21	4.1	44.3	15.3	3.385	Boethius & Ahlström 2018	Journal of Archaeological Science 93 (2018): 196–210	https://doi.org/10.1016/j.jas.2018.02.018
873	Red deer	Cervus elaphus	190	Segebro	Sweden	bone	MM			-22.4	3.8	43	15.7	3.191	Boethius & Ahlström 2018	Journal of Archaeological Science 93 (2018): 196–210	https://doi.org/10.1016/j.jas.2018.02.018
874	Red deer	Cervus elaphus	194	Segebro	Sweden	bone	MM			-22.8	4.7	43.1	15.3	3.291	Boethius & Ahlström 2018	Journal of Archaeological Science 93 (2018): 196–210	https://doi.org/10.1016/j.jas.2018.02.018
875	Red deer	Cervus elaphus	207	Ageröd I:C	Sweden	bone	EM			-23.5	2.9	43.8	14.4	3.543	Boethius & Ahlström 2018	Journal of Archaeological Science 93 (2018): 196–210	https://doi.org/10.1016/j.jas.2018.02.018
876	Red deer	Cervus elaphus	225	Segebro	Sweden	NA	MM			-22.8	3.6	43.5	14.3	3.536	Boethius & Ahlström 2018	Journal of Archaeological Science 93 (2018): 196–210	https://doi.org/10.1016/j.jas.2018.02.018
877	Red deer	Cervus elaphus	295	Huseby klev	Sweden	bone	EM			-21.2	2.5	43.5	15.6	3.258	Boethius & Ahlström 2018	Journal of Archaeological Science 93 (2018): 196–210	https://doi.org/10.1016/j.jas.2018.02.018
878	Red deer	Cervus elaphus	296	Huseby klev	Sweden	bone	EM			-21.4	2.4	43.6	14.9	3.426	Boethius & Ahlström 2018	Journal of Archaeological Science 93 (2018): 196–210	https://doi.org/10.1016/j.jas.2018.02.018
879	Red deer	Cervus elaphus	322	Huseby klev	Sweden	bone	EM			-22	2.9	39.4	12.6	3.636	Boethius & Ahlström 2018	Journal of Archaeological Science 93 (2018): 196–210	https://doi.org/10.1016/j.jas.2018.02.018
880	Red deer	Cervus elaphus	MOT 036	Motala Strandvägen	Sweden	bone	Mesolithic	6518	120	-21.8	3.9			3.7	Eriksson et al 2018	Journal of Archaeological Science: Reports 17 (2018): 904–918	https://doi.org/10.1016/j.jasrep.2016.05.052
881	Red deer	Cervus elaphus	FJE05	Fröjel	Sweden	antler	Viking Age			-21.5	5.3			3	Schyman 2012	Schyman J Masters thesis 2012
882	Red deer	Cervus elaphus	FJE11	Fröjel	Sweden	antler	Viking Age			-21.5	3.5			3	Schyman 2012	Schyman J Masters thesis 2012
883	Red deer	Cervus elaphus	VBY01	Visby	Sweden	antler	Viking Age			-22.5	5.1			3.2	Schyman 2012	Schyman J Masters thesis 2012
884	Red deer	Cervus elaphus	MKA 64	Motala Kanaljorden	Sweden	antler	Mesolithic	6839	44	-21.7	2.7	40.8	14.2	3.3	Eriksson et al 2018	Journal of Archaeological Science: Reports 17 (2018): 904–918	https://doi.org/10.1016/j.jasrep.2016.05.052
885	Red deer	Cervus elaphus	MOT 012	Motala Strandvägen	Sweden	dentine	Mesolithic			-20.5	14	38.3	13.8	3.2	Eriksson et al 2018	Journal of Archaeological Science: Reports 17 (2018): 904–918	https://doi.org/10.1016/j.jasrep.2016.05.052
886	Red deer	Cervus elaphus	MOT 043	Motala Strandvägen	Sweden	dentine	Mesolithic	6521	124	-21.8	5.6	36.3	12.1	3.5	Eriksson et al 2018	Journal of Archaeological Science: Reports 17 (2018): 904–918	https://doi.org/10.1016/j.jasrep.2016.05.052
887	Red deer	Cervus elaphus	MOT 101	Motala Strandvägen	Sweden	dentine	Mesolithic			-21.9	6.1	38.7	13.6	3.3	Eriksson et al 2018	Journal of Archaeological Science: Reports 17 (2018): 904–918	https://doi.org/10.1016/j.jasrep.2016.05.052
888	Red deer	Cervus elaphus	MOT 102	Motala Strandvägen	Sweden	dentine	Mesolithic			-23.2	3.5	36.3	11.5		Eriksson et al 2018	Journal of Archaeological Science: Reports 17 (2018): 904–918	https://doi.org/10.1016/j.jasrep.2016.05.052
889	Red deer	Cervus elaphus	KIA 46912	Ostorf	Germany	dentine	Neolithic			-23	5.4	49.9	17.5	3.3	Fernandes et al 2015	American Journal of Biological Anthropology 158:2 (2015): 325–340	https://doi.org/10.1002/ajpa.22788
890	Red deer	Cervus sp.	81-05	Kałdus	Poland	bone	Medieval			-22.8	3.8	32	11.2	3.3	Reitsema et al 2017	Journal of Anthropological Archaeology 45 (2017): 38–52	https://doi.org/10.1016/j.jaa.2016.11.001
891	Red deer	Cervus sp.	781-02	Kałdus	Poland	bone	Medieval			-21.5	4.4	41.4	14.7	3.3	Reitsema et al 2017	Journal of Anthropological Archaeology 45 (2017): 38–52	https://doi.org/10.1016/j.jaa.2016.11.001
892	Red deer	Cervus sp.	810-02	Kałdus	Poland	bone	Medieval			-21.8	4.2	31.6	11	3.4	Reitsema et al 2017	Journal of Anthropological Archaeology 45 (2017): 38–52	https://doi.org/10.1016/j.jaa.2016.11.001
